# Supplementary material for: Modelling polymorphs of metal–organic frameworks: a systematic study of diamondoid zinc imidazolates
Source: Royal Society of Chemistry journal article supplement (doi:10.1039/b926717d), 2010-01-01
Supplement: b926717d.pdf [file b926717d.pdf]

```
data_dia C2
_audit_creation_date          2009-12-07
_audit_creation_method        'Igor Baburin'
_chemical_formula_moiety
;
dia C2
;
_chemical_formula_sum          'C6 H6 N4 Zn1'
_citation_special_details
;
File: diac2.cif.
;
_cell_length_a                 17.6347
_cell_length_b                 9.8367
_cell_length_c                 9.8784
_cell_angle_alpha              90
_cell_angle_beta               121.91
_cell_angle_gamma              90
_cell_volume                   1454.622
_cell_formula_units_Z          4
_symmetry_space_group_name_H-M 'C 2'
_symmetry_Int_Tables_number    5
_refine_ls_R_factor_all        0
loop_
_symmetry_equiv_pos_site_id
_symmetry_equiv_pos_as_xyz
1 x,y,z
2 -x,y,-z
3 1/2+x,1/2+y,z
4 1/2-x,1/2+y,-z
loop_
_atom_site_label
_atom_site_type_symbol
_atom_site_symmetry_multiplicity
_atom_site_fract_x
_atom_site_fract_y
_atom_site_fract_z
_atom_site_occupancy
H1 H 4 0.15566 0.89354 0.67123 1
H2 H 4 0.27097 0.11608 0.78742 1
H3 H 4 0.24325 0.98321 0.35611 1
H4 H 2 0.50000 0.38418 0.00000 1
H5 H 2 0.50000 0.34528 0.50000 1
H6 H 4 0.44018 0.97766 0.83566 1
H7 H 4 0.56266 0.93917 0.45463 1
C1 C 4 0.18969 0.94629 0.62114 1
C2 C 4 0.24709 0.05673 0.67901 1
C3 C 4 0.23454 0.98956 0.45745 1
C4 C 4 0.47049 0.06250 0.91831 1
C5 C 2 0.50000 0.27318 0.00000 1
C6 C 4 0.53128 0.02412 0.47766 1
C7 C 2 0.50000 0.23426 0.50000 1
N1 N 4 0.18157 0.90403 0.47983 1
N2 N 4 0.27560 0.08363 0.57500 1
N3 N 4 0.45167 0.19647 0.86647 1
N4 N 4 0.55110 0.15797 0.46391 1
Zn1 Zn 4 0.37352 0.22411 0.62475 1
#End of data
```

```
data_dia Cc
_audit_creation_date          2009-12-07
_audit_creation_method        'Igor Baburin'
_chemical_formula_moiety
;
dia Cc
;
_chemical_formula_sum          'C6 H6 N4 Zn1'
_citation_special_details
;
File: diacc.cif.
;
_cell_length_a                 13.9069
_cell_length_b                 14.0549
_cell_length_c                 9.861
_cell_angle_alpha              90
_cell_angle_beta               133.64
_cell_angle_gamma              90
_cell_volume                   1394.864
_cell_formula_units_Z          4
_symmetry_space_group_name_H-M 'C c'
_symmetry_Int_Tables_number    9
_refine_ls_R_factor_all        0
loop_
_symmetry_equiv_pos_site_id
_symmetry_equiv_pos_as_xyz
1 x,y,z
2 x,-y,1/2+z
3 1/2+x,1/2+y,z
4 1/2+x,1/2-y,1/2+z
loop_
_atom_site_label
_atom_site_type_symbol
_atom_site_symmetry_multiplicity
_atom_site_fract_x
_atom_site_fract_y
_atom_site_fract_z
_atom_site_occupancy
H1 H 4 0.86774 0.55160 0.54822 1
H2 H 4 0.52487 0.57210 0.32725 1
H3 H 4 0.29878 0.68811 0.09763 1
H4 H 4 0.58333 0.81230 0.63612 1
H5 H 4 0.18191 0.09608 0.19009 1
H6 H 4 0.17444 0.20833 0.94995 1
C1 C 4 0.71653 0.36225 0.50640 1
C2 C 4 0.72043 0.41808 0.62615 1
C3 C 4 0.81614 0.49586 0.55440 1
C4 C 4 0.50392 0.63954 0.35728 1
C5 C 4 0.39176 0.69685 0.24353 1
C6 C 4 0.53667 0.76238 0.52048 1
N1 N 4 0.78424 0.50286 0.65670 1
N2 N 4 0.27730 0.91198 0.46104 1
N3 N 4 0.59562 0.68154 0.53295 1
N4 N 4 0.41309 0.77480 0.34802 1
Zn1 Zn 4 0.77626 0.62471 0.76051 1
#End of data
```

```
data_dia Fdd2
_audit_creation_date          2009-12-07
_audit_creation_method        'Igor Baburin'
_chemical_formula_moiety
;
dia Fdd2
;
_chemical_formula_sum          'C6 H6 N4 Zn1'
_citation_special_details
;
File: dia_Fdd2SL.cif.
;
_cell_length_a                 14.0004
_cell_length_b                 14.2968
_cell_length_c                 14.418
_cell_angle_alpha              90
_cell_angle_beta               90
_cell_angle_gamma              90
_cell_volume                   2885.92
_cell_formula_units_Z          8
_symmetry_space_group_name_H-M 'F d d 2'
_symmetry_Int_Tables_number    43
_refine_ls_R_factor_all        0
loop_
_symmetry_equiv_pos_site_id
_symmetry_equiv_pos_as_xyz
1 x,y,z
2 -x,-y,z
3 1/4-x,1/4+y,1/4+z
4 1/4+x,1/4-y,1/4+z
5 x,1/2+y,1/2+z
6 1/2+x,y,1/2+z
7 1/2+x,1/2+y,z
8 -x,1/2-y,1/2+z
9 1/2-x,-y,1/2+z
10 1/2-x,1/2-y,z
11 1/4-x,3/4+y,3/4+z
12 3/4-x,1/4+y,3/4+z
13 3/4-x,3/4+y,1/4+z
14 1/4+x,3/4-y,3/4+z
15 3/4+x,1/4-y,3/4+z
16 3/4+x,3/4-y,1/4+z
loop_
_atom_site_label
_atom_site_type_symbol
_atom_site_symmetry_multiplicity
_atom_site_fract_x
_atom_site_fract_y
_atom_site_fract_z
_atom_site_occupancy
H1 H 16 0.71886 0.53290 0.86929 1
H2 H 16 0.82828 0.65159 0.98002 1
H3 H 16 0.55834 0.61104 0.10586 1
C1 C 16 0.70167 0.56610 0.93531 1
C2 C 16 0.75599 0.62517 0.99031 1
C3 C 16 0.61715 0.60595 0.05635 1
N1 N 16 0.61341 0.55381 0.97762 1
N2 N 16 0.70205 0.65037 0.06703 1
Zn1 Zn 8 0.25000 0.75000 0.65935 1
#End of data
```

```
data_dia I4122
_audit_creation_date          2009-12-07
_audit_creation_method        'Igor Baburin'
_chemical_formula_moiety
;
dia I4122
;
_chemical_formula_sum          'C6 H6 N4 Zn1'
_citation_special_details
;
File: diai4122.cif.
;
_cell_length_a                 9.3279
_cell_length_b                 9.3279
_cell_length_c                 16.96
_cell_angle_alpha              90
_cell_angle_beta               90
_cell_angle_gamma              90
_cell_volume                   1475.685
_cell_formula_units_Z          4
_symmetry_space_group_name_H-M 'I 41 2 2'
_symmetry_Int_Tables_number    98
_refine_ls_R_factor_all        0
loop_
_symmetry_equiv_pos_site_id
_symmetry_equiv_pos_as_xyz
1 x,y,z
2 -x,-y,z
3 x,1/2-y,1/4-z
4 -x,1/2+y,1/4-z
5 -y,-x,-z
6 y,x,-z
7 y,1/2-x,1/4+z
8 -y,1/2+x,1/4+z
9 1/2+x,1/2+y,1/2+z
10 1/2-x,1/2-y,1/2+z
11 1/2+x,-y,3/4-z
12 1/2-x,y,3/4-z
13 1/2-y,1/2-x,1/2-z
14 1/2+y,1/2+x,1/2-z
15 1/2+y,-x,3/4+z
16 1/2-y,x,3/4+z
loop_
_atom_site_label
_atom_site_type_symbol
_atom_site_symmetry_multiplicity
_atom_site_fract_x
_atom_site_fract_y
_atom_site_fract_z
_atom_site_occupancy
H1 H 16 0.23417 0.64905 0.56452 1
H2 H 8 0.33732 0.25000 0.62500 1
C1 C 16 0.32360 0.69969 0.59509 1
C2 C 8 0.54568 0.75000 0.62500 1
N1 N 16 0.46493 0.66853 0.57565 1
Zn1 Zn 4 0.50000 0.50000 0.50000 1
#End of data
```

```
data_dia I41
_audit_creation_date          2009-12-07
_audit_creation_method        'Igor Baburin'
_chemical_formula_moiety
;
dia I41
;
_chemical_formula_sum          'C6 H6 N4 Zn1'
_citation_special_details
;
File: diai41.cif.
;
_cell_length_a                 10.0942
_cell_length_b                 10.0942
_cell_length_c                 15.2564
_cell_angle_alpha              90
_cell_angle_beta               90
_cell_angle_gamma              90
_cell_volume                   1554.518
_cell_formula_units_Z          4
_symmetry_space_group_name_H-M 'I 41'
_symmetry_Int_Tables_number    80
_refine_ls_R_factor_all        0
loop_
_symmetry_equiv_pos_site_id
_symmetry_equiv_pos_as_xyz
1 x,y,z
2 -x,-y,z
3 -y,1/2+x,1/4+z
4 y,1/2-x,1/4+z
5 1/2+x,1/2+y,1/2+z
6 1/2-x,1/2-y,1/2+z
7 1/2-y,x,3/4+z
8 1/2+y,-x,3/4+z
loop_
_atom_site_label
_atom_site_type_symbol
_atom_site_symmetry_multiplicity
_atom_site_fract_x
_atom_site_fract_y
_atom_site_fract_z
_atom_site_occupancy
H1 H 8 0.32766 0.24916 0.74528 1
H2 H 8 0.84073 0.97002 0.13638 1
H3 H 8 0.82299 0.10446 0.79220 1
C1 C 8 0.22704 0.96938 0.83262 1
C2 C 8 0.38709 0.26655 0.68682 1
C3 C 8 0.89317 0.87585 0.13240 1
N1 N 8 0.47513 0.17197 0.65536 1
N2 N 8 0.98420 0.85069 0.06609 1
Zn1 Zn 4 0.00000 0.50000 0.22212 1
#End of data
```

```
data_dia I-42d
_audit_creation_date          2009-12-07
_audit_creation_method        'Igor Baburin'
_chemical_formula_moiety
;
dia I-42d
;
_chemical_formula_sum          'C6 H6 N4 Zn1'
_citation_special_details
;
File: diai42d.cif.
;
_cell_length_a                 9.8488
_cell_length_b                 9.8488
_cell_length_c                 14.4373
_cell_angle_alpha              90
_cell_angle_beta               90
_cell_angle_gamma              90
_cell_volume                   1400.402
_cell_formula_units_Z          4
_symmetry_space_group_name_H-M 'I -4 2 d'
_symmetry_Int_Tables_number    122
_refine_ls_R_factor_all        0
loop_
_symmetry_equiv_pos_site_id
_symmetry_equiv_pos_as_xyz
1 x,y,z
2 -x,-y,z
3 x,1/2-y,1/4-z
4 -x,1/2+y,1/4-z
5 y,1/2+x,1/4+z
6 -y,1/2-x,1/4+z
7 -y,x,-z
8 y,-x,-z
9 1/2+x,1/2+y,1/2+z
10 1/2-x,1/2-y,1/2+z
11 1/2+x,-y,3/4-z
12 1/2-x,y,3/4-z
13 1/2+y,x,3/4+z
14 1/2-y,-x,3/4+z
15 1/2-y,1/2+x,1/2-z
16 1/2+y,1/2-x,1/2-z
loop_
_atom_site_label
_atom_site_type_symbol
_atom_site_symmetry_multiplicity
_atom_site_fract_x
_atom_site_fract_y
_atom_site_fract_z
_atom_site_occupancy
H1 H 16 0.63629 0.28600 0.81688 1
H2 H 8 0.88037 0.25000 0.12500 1
C1 C 16 0.69369 0.20141 0.84594 1
C2 C 8 0.99126 0.25000 0.12500 1
N1 N 16 0.65858 0.06765 0.82764 1
Zn1 Zn 4 0.00000 0.00000 0.00000 1
#End of data
```

```
data_dia Ima2
_audit_creation_date          2009-12-07
_audit_creation_method        'Igor Baburin'
_chemical_formula_moiety
;
dia Ima2
;
_chemical_formula_sum          'C6 H6 N4 Zn1'
_citation_special_details
;
File: diaima2.cif.
;
_cell_length_a                 10.4847
_cell_length_b                 14.9471
_cell_length_c                 10.5487
_cell_angle_alpha              90
_cell_angle_beta               90
_cell_angle_gamma              90
_cell_volume                   1653.149
_cell_formula_units_Z          4
_symmetry_space_group_name_H-M 'I m a 2'
_symmetry_Int_Tables_number    46
_refine_ls_R_factor_all        0
loop_
_symmetry_equiv_pos_site_id
_symmetry_equiv_pos_as_xyz
1 x,y,z
2 -x,-y,z
3 1/2-x,y,z
4 1/2+x,-y,z
5 1/2+x,1/2+y,1/2+z
6 1/2-x,1/2-y,1/2+z
7 -x,1/2+y,1/2+z
8 x,1/2-y,1/2+z
loop_
_atom_site_label
_atom_site_type_symbol
_atom_site_symmetry_multiplicity
_atom_site_fract_x
_atom_site_fract_y
_atom_site_fract_z
_atom_site_occupancy
H1 H 8 0.40860 0.43570 0.49058 1
H2 H 4 0.50000 0.50000 0.87020 1
H3 H 4 0.25000 0.16748 0.69729 1
H4 H 4 0.25000 0.05975 0.90619 1
H5 H 4 0.25000 0.33101 0.02238 1
C1 C 8 0.45137 0.46926 0.57086 1
C2 C 4 0.50000 0.50000 0.76674 1
C3 C 4 0.25000 0.18631 0.79664 1
C4 C 4 0.25000 0.13248 0.90284 1
C5 C 4 0.25000 0.27067 0.96444 1
N1 N 8 0.41801 0.44999 0.69501 1
N2 N 4 0.25000 0.27463 0.83549 1
N3 N 4 0.25000 0.18582 0.01138 1
Zn1 Zn 4 0.25000 0.37487 0.70470 1
#End of data
```

```
data_dia P212121
_audit_creation_date          2009-12-07
_audit_creation_method        'Igor Baburin'
_chemical_formula_moiety
;
dia P212121
;
_chemical_formula_sum          'C6 H6 N4 Zn1'
_citation_special_details
;
File: diap212121.cif.
;
_cell_length_a                 9.5495
_cell_length_b                 10.1421
_cell_length_c                 12.9073
_cell_angle_alpha              90
_cell_angle_beta               90
_cell_angle_gamma              90
_cell_volume                   1250.098
_cell_formula_units_Z          4
_symmetry_space_group_name_H-M 'P 21 21 21'
_symmetry_Int_Tables_number    19
_refine_ls_R_factor_all        0
loop_
_symmetry_equiv_pos_site_id
_symmetry_equiv_pos_as_xyz
1 x,y,z
2 1/2-x,-y,1/2+z
3 1/2+x,1/2-y,-z
4 -x,1/2+y,1/2-z
loop_
_atom_site_label
_atom_site_type_symbol
_atom_site_symmetry_multiplicity
_atom_site_fract_x
_atom_site_fract_y
_atom_site_fract_z
_atom_site_occupancy
H1 H 4 0.44093 0.58970 0.12515 1
H2 H 4 0.66937 0.66878 0.24405 1
H3 H 4 0.73282 0.78646 0.93289 1
H4 H 4 0.22032 0.80491 0.28277 1
H5 H 4 0.90104 0.52812 0.21614 1
H6 H 4 0.27898 0.56884 0.38452 1
C1 C 4 0.53519 0.64292 0.10205 1
C2 C 4 0.64950 0.68128 0.16141 1
C3 C 4 0.68441 0.74396 0.00183 1
C4 C 4 0.19110 0.59523 0.33469 1
C5 C 4 0.16158 0.71266 0.28385 1
C6 C 4 0.99557 0.57160 0.24927 1
N1 N 4 0.55784 0.68352 0.00075 1
N2 N 4 0.74435 0.74506 0.09705 1
N3 N 4 0.08512 0.50609 0.31244 1
N4 N 4 0.03694 0.69710 0.22975 1
Zn1 Zn 4 0.93631 0.82097 0.12986 1
#End of data
```



```
data_P3121
_audit_creation_date          2010-03-02
_audit_creation_method        'Igor Baburin'
_chemical_formula_moiety
;
dia P3121
;
_chemical_formula_sum          'C6 H6 N4 Zn1'
_citation_special_details
;
File: diadfinalsym.cif.
;
_cell_length_a                 10.0927
_cell_length_b                 10.0927
_cell_length_c                 24.9858
_cell_angle_alpha              90
_cell_angle_beta               90
_cell_angle_gamma              120
_cell_volume                   2204.137
_cell_formula_units_Z          6
_symmetry_space_group_name_H-M 'P 31 2 1'
_symmetry_Int_Tables_number    152
_refine_ls_R_factor_all        0
loop_
_symmetry_equiv_pos_site_id
_symmetry_equiv_pos_as_xyz
1 x,y,z
2 -y,x-y,1/3+z
3 -x+y,-x,2/3+z
4 x-y,-y,2/3-z
5 -x,-x+y,1/3-z
6 y,x,-z
loop_
_atom_site_label
_atom_site_type_symbol
_atom_site_symmetry_multiplicity
_atom_site_fract_x
_atom_site_fract_y
_atom_site_fract_z
_atom_site_occupancy
H1 H 6 0.08588 0.08043 0.94409 1
H2 H 3 0.52082 0.00000 0.33333 1
H3 H 6 0.84477 0.32776 0.17990 1
H4 H 3 0.00000 0.00950 0.16667 1
H5 H 6 0.88919 0.48382 0.90348 1
H6 H 6 0.18575 0.49533 0.78180 1
H7 H 6 0.04323 0.33740 0.93987 1
C1 C 6 0.16667 0.16511 0.97215 1
C2 C 3 0.62903 0.00000 0.33333 1
C3 C 6 0.92307 0.28434 0.17328 1
C4 C 3 0.00000 0.11770 0.16667 1
C5 C 6 0.97267 0.46357 0.88298 1
C6 C 6 0.04977 0.39125 0.90137 1
C7 C 6 0.12610 0.47198 0.82005 1
N1 N 6 0.29730 0.29571 0.95459 1
N2 N 6 0.87464 0.12968 0.17744 1
N3 N 6 0.02111 0.51458 0.83118 1
N4 N 6 0.14741 0.39682 0.86120 1
Zn1 Zn 6 0.97429 0.66391 0.79292 1
#End of data_P3121
```

```
data_dia P41212 - ..2
_audit_creation_date          2009-12-07
_audit_creation_method        'Igor Baburin'
_chemical_formula_moiety
;
dia P41212 - ..2
;
_chemical_formula_sum          'C6 H6 N4 Zn1'
_citation_special_details
;
File: diap41212sm.cif.
;
_cell_length_a                 10.3414
_cell_length_b                 10.3414
_cell_length_c                 11.8156
_cell_angle_alpha              90
_cell_angle_beta               90
_cell_angle_gamma              90
_cell_volume                   1263.614
_cell_formula_units_Z          4
_symmetry_space_group_name_H-M 'P 41 21 2'
_symmetry_Int_Tables_number    92
_refine_ls_R_factor_all        0
loop_
_symmetry_equiv_pos_site_id
_symmetry_equiv_pos_as_xyz
1 x,y,z
2 -x,-y,1/2+z
3 1/2+x,1/2-y,3/4-z
4 1/2-x,1/2+y,1/4-z
5 -y,-x,1/2-z
6 y,x,-z
7 1/2+y,1/2-x,3/4+z
8 1/2-y,1/2+x,1/4+z
loop_
_atom_site_label
_atom_site_type_symbol
_atom_site_symmetry_multiplicity
_atom_site_fract_x
_atom_site_fract_y
_atom_site_fract_z
_atom_site_occupancy
H1 H 8 0.81101 0.80041 0.78366 1
H2 H 8 0.76565 0.56437 0.89005 1
H3 H 8 0.71127 0.52123 0.53694 1
C1 C 8 0.78280 0.70762 0.74741 1
C2 C 8 0.75944 0.59038 0.80073 1
C3 C 8 0.73075 0.56512 0.61923 1
N1 N 8 0.76429 0.69118 0.63196 1
N2 N 8 0.72623 0.50021 0.71880 1
Zn1 Zn 4 0.80969 0.80969 0.50000 1
#End of data
```

```
data_dia P41212
_audit_creation_date          2009-12-07
_audit_creation_method        'Igor Baburin'
_chemical_formula_moiety
;
dia P41212
;
_chemical_formula_sum          'C6 H6 N4 Zn1'
_citation_special_details
;
File: P41212_.cif.
;
_cell_length_a                 13.9293
_cell_length_b                 13.9293
_cell_length_c                 15.2321
_cell_angle_alpha              90
_cell_angle_beta               90
_cell_angle_gamma              90
_cell_volume                   2955.414
_cell_formula_units_Z          8
_symmetry_space_group_name_H-M 'P 41 21 2'
_symmetry_Int_Tables_number    92
_refine_ls_R_factor_all        0
loop_
_symmetry_equiv_pos_site_id
_symmetry_equiv_pos_as_xyz
1 x,y,z
2 -x,-y,1/2+z
3 1/2+x,1/2-y,3/4-z
4 1/2-x,1/2+y,1/4-z
5 -y,-x,1/2-z
6 y,x,-z
7 1/2+y,1/2-x,3/4+z
8 1/2-y,1/2+x,1/4+z
loop_
_atom_site_label
_atom_site_type_symbol
_atom_site_symmetry_multiplicity
_atom_site_fract_x
_atom_site_fract_y
_atom_site_fract_z
_atom_site_occupancy
H1 H 8 0.61369 0.86003 0.46690 1
H2 H 8 0.52954 0.72884 0.35128 1
H3 H 8 0.57276 0.46920 0.93850 1
H4 H 4 0.72408 0.72408 0.00000 1
H5 H 8 0.45833 0.41428 0.28992 1
H6 H 4 0.68085 0.31915 0.75000 1
H7 H 8 0.67821 0.94088 0.20570 1
C1 C 8 0.61517 0.85708 0.39535 1
C2 C 8 0.57297 0.79226 0.33819 1
C3 C 8 0.64897 0.90051 0.26100 1
C4 C 8 0.58932 0.53760 0.96947 1
C5 C 4 0.66868 0.66868 0.00000 1
C6 C 8 0.44788 0.48848 0.26932 1
C7 C 4 0.62538 0.37462 0.75000 1
N1 N 8 0.66343 0.92560 0.34612 1
N2 N 8 0.59445 0.82009 0.25273 1
N3 N 8 0.67223 0.58852 0.94905 1
N4 N 8 0.36111 0.53550 0.28230 1
Zn1 Zn 8 0.52860 0.75195 0.15043 1
#End of data
```

```
data_dia P41
_audit_creation_date          2009-12-07
_audit_creation_method        'Igor Baburin'
_chemical_formula_moiety
;
dia P41
;
_chemical_formula_sum          'C6 H6 N4 Zn1'
_citation_special_details
;
File: diap41.cif.
;
_cell_length_a                 9.8691
_cell_length_b                 9.8691
_cell_length_c                 13.2008
_cell_angle_alpha              90
_cell_angle_beta               90
_cell_angle_gamma              90
_cell_volume                   1285.746
_cell_formula_units_Z          4
_symmetry_space_group_name_H-M 'P 41'
_symmetry_Int_Tables_number    76
_refine_ls_R_factor_all        0
loop_
_symmetry_equiv_pos_site_id
_symmetry_equiv_pos_as_xyz
1 x,y,z
2 -x,-y,1/2+z
3 -y,x,1/4+z
4 y,-x,3/4+z
loop_
_atom_site_label
_atom_site_type_symbol
_atom_site_symmetry_multiplicity
_atom_site_fract_x
_atom_site_fract_y
_atom_site_fract_z
_atom_site_occupancy
H1 H 4 0.89431 0.54062 0.55826 1
H2 H 4 0.66427 0.60451 0.44438 1
H3 H 4 0.98999 0.85527 0.35246 1
H4 H 4 0.71256 0.58968 0.89865 1
H5 H 4 0.65606 0.82460 0.00975 1
H6 H 4 0.80948 0.52370 0.20717 1
C1 C 4 0.88001 0.61623 0.49898 1
C2 C 4 0.76599 0.64764 0.44221 1
C3 C 4 0.93222 0.77829 0.39326 1
C4 C 4 0.72463 0.61072 0.97928 1
C5 C 4 0.69625 0.72706 0.03448 1
C6 C 4 0.77565 0.57372 0.13782 1
N1 N 4 0.98522 0.69949 0.46765 1
N2 N 4 0.79972 0.75087 0.37525 1
N3 N 4 0.77498 0.51364 0.04534 1
N4 N 4 0.72899 0.70296 0.13513 1
Zn1 Zn 4 0.68268 0.81789 0.25893 1
#End of data
```

```
data_dia P4322
_audit_creation_date          2009-12-07
_audit_creation_method        'Igor Baburin'
_chemical_formula_moiety
;
dia P4322
;
_chemical_formula_sum          'C6 H6 N4 Zn1'
_citation_special_details
;
File: diap4322.cif.
;
_cell_length_a                 9.8724
_cell_length_b                 9.8724
_cell_length_c                 15.5143
_cell_angle_alpha              90
_cell_angle_beta               90
_cell_angle_gamma              90
_cell_volume                   1512.09
_cell_formula_units_Z          4
_symmetry_space_group_name_H-M 'P 43 2 2'
_symmetry_Int_Tables_number    95
_refine_ls_R_factor_all        0
loop_
_symmetry_equiv_pos_site_id
_symmetry_equiv_pos_as_xyz
1 x,y,z
2 -x,-y,1/2+z
3 x,-y,1/2-z
4 -x,y,-z
5 -y,-x,3/4-z
6 y,x,1/4-z
7 y,-x,1/4+z
8 -y,x,3/4+z
loop_
_atom_site_label
_atom_site_type_symbol
_atom_site_symmetry_multiplicity
_atom_site_fract_x
_atom_site_fract_y
_atom_site_fract_z
_atom_site_occupancy
H1 H 4 0.59784 0.50000 0.75000 1
H2 H 8 0.99841 0.88596 0.69761 1
H3 H 4 0.59336 0.00000 0.75000 1
H4 H 8 0.00259 0.59819 0.68516 1
C1 C 8 0.91828 0.54840 0.71768 1
C2 C 4 0.70833 0.50000 0.75000 1
C3 C 8 0.91364 0.94273 0.72430 1
C4 C 4 0.70400 0.00000 0.75000 1
N1 N 8 0.78472 0.57881 0.69714 1
N2 N 8 0.78030 0.90702 0.70728 1
Zn1 Zn 4 0.74575 0.25425 0.87500 1
#End of data
```

```
data_dia Pna21
_audit_creation_date          2009-12-07
_audit_creation_method        'Igor Baburin'
_chemical_formula_moiety
;
dia Pna21
;
_chemical_formula_sum          'C6 H6 N4 Zn1'
_citation_special_details
;
File: diapna21.cif.
;
_cell_length_a                 10.0637
_cell_length_b                 13.211
_cell_length_c                 10.3254
_cell_angle_alpha              90
_cell_angle_beta               90
_cell_angle_gamma              90
_cell_volume                   1372.778
_cell_formula_units_Z          4
_symmetry_space_group_name_H-M 'P n a 21'
_symmetry_Int_Tables_number    33
_refine_ls_R_factor_all        0
loop_
_symmetry_equiv_pos_site_id
_symmetry_equiv_pos_as_xyz
1 x,y,z
2 -x,-y,1/2+z
3 1/2-x,1/2+y,1/2+z
4 1/2+x,1/2-y,z
loop_
_atom_site_label
_atom_site_type_symbol
_atom_site_symmetry_multiplicity
_atom_site_fract_x
_atom_site_fract_y
_atom_site_fract_z
_atom_site_occupancy
H1 H 4 0.55446 0.92489 0.45941 1
H2 H 4 0.40280 0.13050 0.73649 1
H3 H 4 0.44173 0.23182 0.50298 1
H4 H 4 0.75994 0.81281 0.81272 1
H5 H 4 0.69240 0.54805 0.59169 1
H6 H 4 0.46326 0.66839 0.58865 1
C1 C 4 0.51872 0.99516 0.50274 1
C2 C 4 0.44058 0.10220 0.64439 1
C3 C 4 0.45989 0.15287 0.52824 1
C4 C 4 0.71040 0.75697 0.75153 1
C5 C 4 0.67247 0.62100 0.63717 1
C6 C 4 0.55914 0.68084 0.63525 1
N1 N 4 0.47839 0.00204 0.62780 1
N2 N 4 0.50937 0.08437 0.43836 1
N3 N 4 0.76809 0.66971 0.71124 1
N4 N 4 0.58379 0.76716 0.70806 1
Zn1 Zn 4 0.45511 0.88184 0.74915 1
#End of data
```

```
data_dia Pnc2
_audit_creation_date          2009-12-07
_audit_creation_method        'Igor Baburin'
_chemical_formula_moiety
;
dia Pnc2
;
_chemical_formula_sum          'C6 H6 N4 Zn1'
_citation_special_details
;
File: diapnc2.cif.
;
_cell_length_a                 9.8932
_cell_length_b                 14.905
_cell_length_c                 10.0067
_cell_angle_alpha              90
_cell_angle_beta               90
_cell_angle_gamma              90
_cell_volume                   1475.569
_cell_formula_units_Z          4
_symmetry_space_group_name_H-M 'P n c 2'
_symmetry_Int_Tables_number    30
_refine_ls_R_factor_all        0
loop_
_symmetry_equiv_pos_site_id
_symmetry_equiv_pos_as_xyz
1 x,y,z
2 -x,-y,z
3 -x,1/2+y,1/2+z
4 x,1/2-y,1/2+z
loop_
_atom_site_label
_atom_site_type_symbol
_atom_site_symmetry_multiplicity
_atom_site_fract_x
_atom_site_fract_y
_atom_site_fract_z
_atom_site_occupancy
H1 H 4 0.89165 0.44006 0.76959 1
H2 H 2 0.00000 0.50000 0.16862 1
H3 H 4 0.39759 0.56433 0.77060 1
H4 H 2 0.50000 0.50000 0.17013 1
H5 H 4 0.98672 0.24419 0.45124 1
H6 H 4 0.99230 0.35649 0.22895 1
H7 H 4 0.59804 0.25016 0.27525 1
C1 C 4 0.94567 0.47060 0.85298 1
C2 C 2 0.00000 0.50000 0.05951 1
C3 C 4 0.44955 0.53223 0.85400 1
C4 C 2 0.50000 0.50000 0.06105 1
C5 C 4 0.90608 0.26276 0.38234 1
C6 C 4 0.90855 0.31900 0.27226 1
C7 C 4 0.70482 0.26423 0.29306 1
N1 N 4 0.91129 0.45211 0.98454 1
N2 N 4 0.41798 0.55271 0.98575 1
N3 N 4 0.77668 0.22798 0.39514 1
N4 N 4 0.78020 0.32023 0.21585 1
Zn1 Zn 4 0.74717 0.37316 0.03237 1
#End of data
```

**basis**



**Wyckoff positions compatible with the embeddings of the diamond net with one crystallographic kind of a node\***

| Space group  | Wyckoff position     | Space group  | Wyckoff position     |
|--------------|----------------------|--------------|----------------------|
| $P\bar{1}$   | $2i$                 | $P4_12_12$   | $4a$ (..2)           |
| $C2$         | $4c$                 | $P4_12_12$   | $8b$                 |
| $Cc$         | $4a$                 | $P4_322$     | $4c$ (..2)           |
| $P2/c$       | $4g$                 | $P4_32_12$   | $4a$ (..2)           |
| $P2_1/c$     | $4e$                 | $P4_32_12$   | $8b$                 |
| $C2/c$       | $4e$ (..2)           | $I4_122$     | $4a$ (2.22)          |
| $C2/c$       | $8f$                 | $I4_1md$     | $4a$ (2mm.)          |
| $C2/m$       | $4i$ (.m.)           | $I\bar{4}2d$ | $4a$ ( $\bar{4}$ ..) |
| $P222_1$     | $4e$                 | $I4_1/amd$   | $4a$ ( $\bar{4}m2$ ) |
| $P2_12_12_1$ | $4a$                 | $R\bar{3}$   | $6c$ (3.)            |
| $I2_12_12_1$ | $4a$ (2..)           | $P3_121$     | $6c$                 |
| $Pnc2$       | $4c$                 | $P3_221$     | $6c$                 |
| $Pna2_1$     | $4a$                 | $R32$        | $6c$ (3.)            |
| $Fdd2$       | $8a$ (..2)           | $R\bar{3}m$  | $6c$ (3m)            |
| $Ima2$       | $4b$ (m..)           | $R\bar{3}c$  | $12c$ (3.)           |
| $Pnna$       | $4c$ (..2)           | $Fd\bar{3}$  | $8a$ (23.)           |
| $Pnna$       | $8e$                 | $F4_132$     | $8a$ (23.)           |
| $Pmna$       | $4h$ (m..)           | $P4_332$     | $8c$ (.3.)           |
| $Pbcn$       | $8d$                 | $P4_132$     | $8c$ (.3.)           |
| $Pnma$       | $4c$ (.m.)           | $Fd\bar{3}m$ | $8a$ ( $\bar{4}3m$ ) |
| $Fddd$       | $8a$ (222)           |              |                      |
| $Imma$       | $4e$ (mm2)           |              |                      |
| $P4_1$       | $4a$                 |              |                      |
| $P4_3$       | $4a$                 |              |                      |
| $I4_1$       | $4a$ (2..)           |              |                      |
| $I4_1/a$     | $4a$ ( $\bar{4}$ ..) |              |                      |
| $P4_122$     | $4c$ (..2)           |              |                      |

\* Only one Wyckoff position out of a Wyckoff set is given; for enantiomorphic pairs of space groups information is given twice. For special positions oriented site-symmetry symbols are given in parentheses.

```
data_C6 H6 N4 Zn/Aea2 Pnc2
_audit_creation_date          2009-12-07
_audit_creation_method        'Igor Baburin'
_chemical_formula_moiety
;
C6 H6 N4 Zn/Aea2 Pnc2
;
_chemical_formula_sum          'C6 H6 N4 Zn1'
_citation_special_details
;
File: Aea2.cif.
;
_cell_length_a                 13.1893
_cell_length_b                 10.8884
_cell_length_c                 11.0019
_cell_angle_alpha              90
_cell_angle_beta               90
_cell_angle_gamma              90
_cell_volume                   1579.987
_cell_formula_units_Z          8
_symmetry_space_group_name_H-M 'P 1'
_symmetry_Int_Tables_number    1
_refine_ls_R_factor_all        0
loop_
_symmetry_equiv_pos_site_id
_symmetry_equiv_pos_as_xyz
1 x,y,z
loop_
_atom_site_label
_atom_site_type_symbol
_atom_site_symmetry_multiplicity
_atom_site_fract_x
_atom_site_fract_y
_atom_site_fract_z
_atom_site_occupancy
H1 H 1 0.25325 0.89740 0.77869 1
H2 H 1 0.33186 0.53296 0.69257 1
H3 H 1 0.23850 0.53739 0.92075 1
H4 H 1 0.50000 0.00000 0.66864 1
H5 H 1 0.55289 0.11208 0.30744 1
H6 H 1 0.50000 0.50000 0.66648 1
H7 H 1 0.44996 0.61347 0.30549 1
H8 H 1 0.55004 0.38653 0.30549 1
H9 H 1 0.05004 0.11347 0.30549 1
H10 H 1 0.94996 0.88653 0.30549 1
H11 H 1 0.00000 0.00000 0.66648 1
H12 H 1 0.44711 0.88792 0.30744 1
H13 H 1 0.94711 0.61208 0.30744 1
H14 H 1 0.05289 0.38792 0.30744 1
H15 H 1 0.00000 0.50000 0.66864 1
H16 H 1 0.76150 0.46261 0.92075 1
H17 H 1 0.26150 0.03739 0.92075 1
H18 H 1 0.73849 0.96261 0.92074 1
H19 H 1 0.66815 0.46704 0.69257 1
H20 H 1 0.16815 0.03296 0.69257 1
H21 H 1 0.83185 0.96704 0.69257 1
H22 H 1 0.74675 0.10260 0.77869 1
H23 H 1 0.24675 0.39740 0.77869 1
H24 H 1 0.75326 0.60260 0.77869 1
H25 H 1 0.75325 0.10260 0.27869 1
H26 H 1 0.24675 0.89740 0.27869 1
H27 H 1 0.74675 0.60260 0.27869 1
H28 H 1 0.83186 0.46704 0.19257 1
H29 H 1 0.16814 0.53296 0.19257 1
H30 H 1 0.66815 0.96704 0.19257 1
```

|     |   |   |         |         |         |   |
|-----|---|---|---------|---------|---------|---|
| H31 | H | 1 | 0.73850 | 0.46261 | 0.42075 | 1 |
| H32 | H | 1 | 0.26150 | 0.53739 | 0.42075 | 1 |
| H33 | H | 1 | 0.76150 | 0.96261 | 0.42075 | 1 |
| H34 | H | 1 | 0.00000 | 0.00000 | 0.16864 | 1 |
| H35 | H | 1 | 0.05289 | 0.88792 | 0.80744 | 1 |
| H36 | H | 1 | 0.94711 | 0.11208 | 0.80744 | 1 |
| H37 | H | 1 | 0.44711 | 0.38792 | 0.80744 | 1 |
| H38 | H | 1 | 0.00000 | 0.50000 | 0.16648 | 1 |
| H39 | H | 1 | 0.94996 | 0.38653 | 0.80549 | 1 |
| H40 | H | 1 | 0.05004 | 0.61347 | 0.80549 | 1 |
| H41 | H | 1 | 0.55004 | 0.88653 | 0.80549 | 1 |
| H42 | H | 1 | 0.44996 | 0.11347 | 0.80549 | 1 |
| H43 | H | 1 | 0.50000 | 0.00000 | 0.16648 | 1 |
| H44 | H | 1 | 0.55289 | 0.61208 | 0.80744 | 1 |
| H45 | H | 1 | 0.50000 | 0.50000 | 0.16864 | 1 |
| H46 | H | 1 | 0.23850 | 0.03739 | 0.42075 | 1 |
| H47 | H | 1 | 0.33185 | 0.03296 | 0.19257 | 1 |
| H48 | H | 1 | 0.25325 | 0.39740 | 0.27869 | 1 |
| C1  | C | 1 | 0.25930 | 0.79820 | 0.78591 | 1 |
| C2  | C | 1 | 0.30079 | 0.60924 | 0.74444 | 1 |
| C3  | C | 1 | 0.25416 | 0.61177 | 0.85724 | 1 |
| C4  | C | 1 | 0.50000 | 0.00000 | 0.57012 | 1 |
| C5  | C | 1 | 0.52656 | 0.05491 | 0.38238 | 1 |
| C6  | C | 1 | 0.50000 | 0.50000 | 0.56784 | 1 |
| C7  | C | 1 | 0.47560 | 0.55648 | 0.38083 | 1 |
| C8  | C | 1 | 0.52441 | 0.44352 | 0.38083 | 1 |
| C9  | C | 1 | 0.02441 | 0.05648 | 0.38083 | 1 |
| C10 | C | 1 | 0.97560 | 0.94352 | 0.38083 | 1 |
| C11 | C | 1 | 0.00000 | 0.00000 | 0.56784 | 1 |
| C12 | C | 1 | 0.47344 | 0.94509 | 0.38238 | 1 |
| C13 | C | 1 | 0.97344 | 0.55490 | 0.38238 | 1 |
| C14 | C | 1 | 0.02656 | 0.44509 | 0.38238 | 1 |
| C15 | C | 1 | 0.00000 | 0.50000 | 0.57012 | 1 |
| C16 | C | 1 | 0.74584 | 0.38823 | 0.85724 | 1 |
| C17 | C | 1 | 0.24584 | 0.11177 | 0.85724 | 1 |
| C18 | C | 1 | 0.75416 | 0.88823 | 0.85724 | 1 |
| C19 | C | 1 | 0.69921 | 0.39076 | 0.74443 | 1 |
| C20 | C | 1 | 0.19921 | 0.10924 | 0.74444 | 1 |
| C21 | C | 1 | 0.80079 | 0.89076 | 0.74443 | 1 |
| C22 | C | 1 | 0.74070 | 0.20180 | 0.78590 | 1 |
| C23 | C | 1 | 0.24070 | 0.29820 | 0.78591 | 1 |
| C24 | C | 1 | 0.75930 | 0.70180 | 0.78591 | 1 |
| C25 | C | 1 | 0.75930 | 0.20180 | 0.28591 | 1 |
| C26 | C | 1 | 0.24070 | 0.79820 | 0.28591 | 1 |
| C27 | C | 1 | 0.74070 | 0.70180 | 0.28591 | 1 |
| C28 | C | 1 | 0.80079 | 0.39076 | 0.24444 | 1 |
| C29 | C | 1 | 0.19921 | 0.60924 | 0.24444 | 1 |
| C30 | C | 1 | 0.69921 | 0.89076 | 0.24444 | 1 |
| C31 | C | 1 | 0.75416 | 0.38823 | 0.35724 | 1 |
| C32 | C | 1 | 0.24584 | 0.61177 | 0.35724 | 1 |
| C33 | C | 1 | 0.74584 | 0.88823 | 0.35724 | 1 |
| C34 | C | 1 | 0.00000 | 0.00000 | 0.07012 | 1 |
| C35 | C | 1 | 0.02656 | 0.94509 | 0.88238 | 1 |
| C36 | C | 1 | 0.97344 | 0.05490 | 0.88238 | 1 |
| C37 | C | 1 | 0.47344 | 0.44509 | 0.88238 | 1 |
| C38 | C | 1 | 0.00000 | 0.50000 | 0.06784 | 1 |
| C39 | C | 1 | 0.97560 | 0.44352 | 0.88083 | 1 |
| C40 | C | 1 | 0.02441 | 0.55648 | 0.88083 | 1 |
| C41 | C | 1 | 0.52440 | 0.94352 | 0.88083 | 1 |
| C42 | C | 1 | 0.47559 | 0.05648 | 0.88083 | 1 |
| C43 | C | 1 | 0.50000 | 0.00000 | 0.06784 | 1 |
| C44 | C | 1 | 0.52656 | 0.55490 | 0.88238 | 1 |
| C45 | C | 1 | 0.50000 | 0.50000 | 0.07012 | 1 |
| C46 | C | 1 | 0.25416 | 0.11177 | 0.35724 | 1 |
| C47 | C | 1 | 0.30079 | 0.10924 | 0.24444 | 1 |

```
C48 C 1 0.25930 0.29820 0.28591 1
N1 N 1 0.30487 0.72786 0.69927 1
N2 N 1 0.22631 0.73173 0.88320 1
N3 N 1 0.54416 0.08928 0.50164 1
N4 N 1 0.45919 0.59235 0.50014 1
N5 N 1 0.54081 0.40765 0.50014 1
N6 N 1 0.04081 0.09235 0.50014 1
N7 N 1 0.95919 0.90765 0.50014 1
N8 N 1 0.45584 0.91073 0.50164 1
N9 N 1 0.95584 0.58927 0.50164 1
N10 N 1 0.04416 0.41072 0.50164 1
N11 N 1 0.77369 0.26827 0.88320 1
N12 N 1 0.27369 0.23173 0.88320 1
N13 N 1 0.72631 0.76827 0.88320 1
N14 N 1 0.69513 0.27214 0.69927 1
N15 N 1 0.19513 0.22786 0.69927 1
N16 N 1 0.80487 0.77214 0.69927 1
N17 N 1 0.80487 0.27214 0.19927 1
N18 N 1 0.19513 0.72786 0.19927 1
N19 N 1 0.69513 0.77214 0.19927 1
N20 N 1 0.72631 0.26827 0.38320 1
N21 N 1 0.27369 0.73173 0.38320 1
N22 N 1 0.77369 0.76827 0.38320 1
N23 N 1 0.04416 0.91072 0.00164 1
N24 N 1 0.95584 0.08927 0.00164 1
N25 N 1 0.45584 0.41072 0.00164 1
N26 N 1 0.95919 0.40765 0.00014 1
N27 N 1 0.04081 0.59235 0.00014 1
N28 N 1 0.54081 0.90765 0.00014 1
N29 N 1 0.45919 0.09235 0.00014 1
N30 N 1 0.54416 0.58927 0.00164 1
N31 N 1 0.22631 0.23173 0.38320 1
N32 N 1 0.30487 0.22786 0.19927 1
Zn1 Zn 1 0.37303 0.75438 0.53355 1
Zn2 Zn 1 0.62697 0.24562 0.53355 1
Zn3 Zn 1 0.12697 0.25438 0.53355 1
Zn4 Zn 1 0.87303 0.74562 0.53355 1
Zn5 Zn 1 0.87303 0.24562 0.03355 1
Zn6 Zn 1 0.12697 0.75438 0.03355 1
Zn7 Zn 1 0.62697 0.74562 0.03355 1
Zn8 Zn 1 0.37303 0.25438 0.03355 1
#End of data
```

```
data_C6 H6 N4 Zn/C2/c_Cc
_audit_creation_date          2009-12-07
_audit_creation_method        'Igor Baburin'
_chemical_formula_moiety
;
C6 H6 N4 Zn/C2/c_Cc
;
_chemical_formula_sum          'C6 H6 N4 Zn1'
_citation_special_details
;
File: dia_C2cfin.cif.
;
_cell_length_a                 15.0523
_cell_length_b                 14.1537
_cell_length_c                 10.6863
_cell_angle_alpha              90
_cell_angle_beta               137.96
_cell_angle_gamma              90
_cell_volume                   1524.571
_cell_formula_units_Z          8
_symmetry_space_group_name_H-M 'P 1'
_symmetry_Int_Tables_number    1
_refine_ls_R_factor_all        0
loop_
_symmetry_equiv_pos_site_id
_symmetry_equiv_pos_as_xyz
1 x,y,z
loop_
_atom_site_label
_atom_site_type_symbol
_atom_site_symmetry_multiplicity
_atom_site_fract_x
_atom_site_fract_y
_atom_site_fract_z
_atom_site_occupancy
H1 H 1 0.65542 0.67922 0.87089 1
H2 H 1 0.65946 0.58102 0.10001 1
H3 H 1 0.11658 0.32112 0.66020 1
H4 H 1 0.79234 0.18622 0.14282 1
H5 H 1 0.00999 0.06521 0.36980 1
H6 H 1 0.39320 0.06522 0.57745 1
H7 H 1 0.60686 0.06523 0.92258 1
H8 H 1 0.60685 0.93479 0.42258 1
H9 H 1 0.39319 0.93478 0.07745 1
H10 H 1 0.99005 0.06522 0.13022 1
H11 H 1 0.99005 0.93479 0.63022 1
H12 H 1 0.00999 0.93479 0.86980 1
H13 H 1 0.20771 0.18622 0.35720 1
H14 H 1 0.20771 0.81379 0.85720 1
H15 H 1 0.79233 0.81378 0.64282 1
H16 H 1 0.88346 0.32113 0.83982 1
H17 H 1 0.88346 0.67888 0.33982 1
H18 H 1 0.11658 0.67888 0.16020 1
H19 H 1 0.34058 0.58102 0.40001 1
H20 H 1 0.34058 0.41899 0.89999 1
H21 H 1 0.65944 0.41899 0.60000 1
H22 H 1 0.34462 0.67922 0.62912 1
H23 H 1 0.34462 0.32078 0.12912 1
H24 H 1 0.65541 0.32079 0.37088 1
H25 H 1 0.15540 0.82079 0.37086 1
H26 H 1 0.84463 0.82078 0.12913 1
H27 H 1 0.84464 0.17922 0.62914 1
H28 H 1 0.15944 0.91899 0.59998 1
H29 H 1 0.84059 0.91899 0.90001 1
H30 H 1 0.84060 0.08102 0.40002 1
```

|     |   |   |         |         |         |   |
|-----|---|---|---------|---------|---------|---|
| H31 | H | 1 | 0.61658 | 0.17888 | 0.16020 | 1 |
| H32 | H | 1 | 0.38347 | 0.17889 | 0.33982 | 1 |
| H33 | H | 1 | 0.38346 | 0.82113 | 0.83982 | 1 |
| H34 | H | 1 | 0.29234 | 0.31378 | 0.64283 | 1 |
| H35 | H | 1 | 0.70771 | 0.31378 | 0.85721 | 1 |
| H36 | H | 1 | 0.70771 | 0.68622 | 0.35719 | 1 |
| H37 | H | 1 | 0.50999 | 0.43479 | 0.86981 | 1 |
| H38 | H | 1 | 0.49005 | 0.43479 | 0.63022 | 1 |
| H39 | H | 1 | 0.49005 | 0.56521 | 0.13021 | 1 |
| H40 | H | 1 | 0.89319 | 0.43478 | 0.07745 | 1 |
| H41 | H | 1 | 0.10685 | 0.43478 | 0.42258 | 1 |
| H42 | H | 1 | 0.10686 | 0.56523 | 0.92258 | 1 |
| H43 | H | 1 | 0.89320 | 0.56522 | 0.57745 | 1 |
| H44 | H | 1 | 0.50999 | 0.56522 | 0.36980 | 1 |
| H45 | H | 1 | 0.29234 | 0.68622 | 0.14282 | 1 |
| H46 | H | 1 | 0.61658 | 0.82112 | 0.66020 | 1 |
| H47 | H | 1 | 0.15945 | 0.08102 | 0.10000 | 1 |
| H48 | H | 1 | 0.15541 | 0.17922 | 0.87088 | 1 |
| C1  | C | 1 | 0.05813 | 0.26816 | 0.54894 | 1 |
| C2  | C | 1 | 0.89180 | 0.19658 | 0.28425 | 1 |
| C3  | C | 1 | 0.00049 | 0.13656 | 0.39715 | 1 |
| C4  | C | 1 | 0.32919 | 0.01192 | 0.55299 | 1 |
| C5  | C | 1 | 0.20866 | 0.93528 | 0.56320 | 1 |
| C6  | C | 1 | 0.20675 | 0.88598 | 0.44908 | 1 |
| C7  | C | 1 | 0.79328 | 0.88598 | 0.05093 | 1 |
| C8  | C | 1 | 0.79329 | 0.11403 | 0.55093 | 1 |
| C9  | C | 1 | 0.20676 | 0.11402 | 0.94910 | 1 |
| C10 | C | 1 | 0.79137 | 0.93527 | 0.93681 | 1 |
| C11 | C | 1 | 0.79137 | 0.06473 | 0.43682 | 1 |
| C12 | C | 1 | 0.20868 | 0.06473 | 0.06320 | 1 |
| C13 | C | 1 | 0.67086 | 0.01193 | 0.94703 | 1 |
| C14 | C | 1 | 0.67086 | 0.98809 | 0.44703 | 1 |
| C15 | C | 1 | 0.32919 | 0.98808 | 0.05299 | 1 |
| C16 | C | 1 | 0.99955 | 0.13656 | 0.10287 | 1 |
| C17 | C | 1 | 0.99955 | 0.86344 | 0.60287 | 1 |
| C18 | C | 1 | 0.00049 | 0.86344 | 0.89715 | 1 |
| C19 | C | 1 | 0.10825 | 0.19659 | 0.21577 | 1 |
| C20 | C | 1 | 0.10824 | 0.80342 | 0.71577 | 1 |
| C21 | C | 1 | 0.89180 | 0.80342 | 0.78425 | 1 |
| C22 | C | 1 | 0.94191 | 0.26816 | 0.95109 | 1 |
| C23 | C | 1 | 0.94191 | 0.73185 | 0.45109 | 1 |
| C24 | C | 1 | 0.05813 | 0.73185 | 0.04893 | 1 |
| C25 | C | 1 | 0.55814 | 0.23184 | 0.04893 | 1 |
| C26 | C | 1 | 0.44191 | 0.23185 | 0.45109 | 1 |
| C27 | C | 1 | 0.44191 | 0.76816 | 0.95109 | 1 |
| C28 | C | 1 | 0.39180 | 0.30342 | 0.78425 | 1 |
| C29 | C | 1 | 0.60825 | 0.30342 | 0.71577 | 1 |
| C30 | C | 1 | 0.60825 | 0.69659 | 0.21576 | 1 |
| C31 | C | 1 | 0.50049 | 0.36345 | 0.89715 | 1 |
| C32 | C | 1 | 0.49955 | 0.36345 | 0.60288 | 1 |
| C33 | C | 1 | 0.49955 | 0.63656 | 0.10287 | 1 |
| C34 | C | 1 | 0.82919 | 0.48808 | 0.05300 | 1 |
| C35 | C | 1 | 0.17086 | 0.48808 | 0.44703 | 1 |
| C36 | C | 1 | 0.17086 | 0.51193 | 0.94703 | 1 |
| C37 | C | 1 | 0.70868 | 0.56473 | 0.06321 | 1 |
| C38 | C | 1 | 0.29136 | 0.56473 | 0.43680 | 1 |
| C39 | C | 1 | 0.29136 | 0.43527 | 0.93679 | 1 |
| C40 | C | 1 | 0.70676 | 0.61403 | 0.94911 | 1 |
| C41 | C | 1 | 0.29328 | 0.61403 | 0.55091 | 1 |
| C42 | C | 1 | 0.29327 | 0.38598 | 0.05091 | 1 |
| C43 | C | 1 | 0.70675 | 0.38597 | 0.44910 | 1 |
| C44 | C | 1 | 0.70867 | 0.43527 | 0.56320 | 1 |
| C45 | C | 1 | 0.82919 | 0.51192 | 0.55300 | 1 |
| C46 | C | 1 | 0.50049 | 0.63656 | 0.39714 | 1 |
| C47 | C | 1 | 0.39180 | 0.69659 | 0.28425 | 1 |

C48 C 1 0.55813 0.76816 0.54893 1  
N1 N 1 0.92830 0.27990 0.38142 1  
N2 N 1 0.10608 0.18219 0.56418 1  
N3 N 1 0.78338 0.43473 0.44273 1  
N4 N 1 0.28683 0.01524 0.62963 1  
N5 N 1 0.71320 0.01524 0.87038 1  
N6 N 1 0.71321 0.98477 0.37039 1  
N7 N 1 0.28684 0.98477 0.12964 1  
N8 N 1 0.21666 0.43474 0.05729 1  
N9 N 1 0.21666 0.56528 0.55729 1  
N10 N 1 0.78338 0.56527 0.94273 1  
N11 N 1 0.89397 0.18220 0.93585 1  
N12 N 1 0.89397 0.81782 0.43584 1  
N13 N 1 0.10607 0.81781 0.06418 1  
N14 N 1 0.07174 0.27991 0.11861 1  
N15 N 1 0.07174 0.72010 0.61861 1  
N16 N 1 0.92830 0.72009 0.88141 1  
N17 N 1 0.42830 0.22009 0.88142 1  
N18 N 1 0.57174 0.22010 0.61861 1  
N19 N 1 0.57174 0.77991 0.11861 1  
N20 N 1 0.60608 0.31781 0.06418 1  
N21 N 1 0.39397 0.31781 0.43584 1  
N22 N 1 0.39397 0.68220 0.93584 1  
N23 N 1 0.28338 0.06527 0.94273 1  
N24 N 1 0.71667 0.06527 0.55730 1  
N25 N 1 0.71666 0.93474 0.05730 1  
N26 N 1 0.78684 0.48477 0.12965 1  
N27 N 1 0.21321 0.48477 0.37038 1  
N28 N 1 0.21320 0.51524 0.87038 1  
N29 N 1 0.78683 0.51524 0.62964 1  
N30 N 1 0.28337 0.93473 0.44272 1  
N31 N 1 0.60607 0.68219 0.56418 1  
N32 N 1 0.42830 0.77991 0.38141 1  
Zn1 Zn 1 0.29155 0.11748 0.77129 1  
Zn2 Zn 1 0.70849 0.11748 0.72873 1  
Zn3 Zn 1 0.70849 0.88253 0.22873 1  
Zn4 Zn 1 0.29155 0.88253 0.27129 1  
Zn5 Zn 1 0.79155 0.38252 0.27130 1  
Zn6 Zn 1 0.20849 0.38253 0.22873 1  
Zn7 Zn 1 0.20849 0.61748 0.72872 1  
Zn8 Zn 1 0.79155 0.61748 0.77129 1  
#End of data

```
data_C6 H6 N4 Zn/ I41acd/I4122
_audit_creation_date          2009-12-07
_audit_creation_method        'Igor Baburin'
_chemical_formula_moiety
;
C6 H6 N4 Zn/ I41cd/I41
;
_chemical_formula_sum          'C6 H6 N4 Zn1'
_citation_special_details
;
File: I41acd_I4122.cif.
;
_cell_length_a                 10.8324
_cell_length_b                 10.8324
_cell_length_c                 13.9715
_cell_angle_alpha              90
_cell_angle_beta               90
_cell_angle_gamma              90
_cell_volume                   1639.428
_cell_formula_units_Z          8
_symmetry_space_group_name_H-M 'P 1'
_symmetry_Int_Tables_number    1
_refine_ls_R_factor_all        0
loop_
_symmetry_equiv_pos_site_id
_symmetry_equiv_pos_as_xyz
1 x,y,z
loop_
_atom_site_label
_atom_site_type_symbol
_atom_site_symmetry_multiplicity
_atom_site_fract_x
_atom_site_fract_y
_atom_site_fract_z
_atom_site_occupancy
H1 H 1 0.22205 0.86516 0.57940 1
H2 H 1 0.77756 0.13485 0.57941 1
H3 H 1 0.22245 0.63549 0.67077 1
H4 H 1 0.77771 0.36453 0.67080 1
H5 H 1 0.13531 0.77751 0.42076 1
H6 H 1 0.86439 0.22219 0.42079 1
H7 H 1 0.86523 0.27762 0.82944 1
H8 H 1 0.13484 0.72208 0.82941 1
H9 H 1 0.27770 0.13541 0.67077 1
H10 H 1 0.72239 0.86436 0.67074 1
H11 H 1 0.77778 0.86518 0.07939 1
H12 H 1 0.22231 0.13482 0.07937 1
H13 H 1 0.36520 0.22221 0.82937 1
H14 H 1 0.63478 0.77771 0.82940 1
H15 H 1 0.13553 0.22225 0.92075 1
H16 H 1 0.86446 0.77758 0.92079 1
H17 H 1 0.14432 0.24979 0.62448 1
H18 H 1 0.85556 0.74945 0.62455 1
H19 H 1 0.75027 0.14433 0.87433 1
H20 H 1 0.24986 0.85554 0.87431 1
H21 H 1 0.35556 0.75035 0.62429 1
H22 H 1 0.64433 0.25000 0.62434 1
H23 H 1 0.14434 0.74951 0.12434 1
H24 H 1 0.85556 0.24988 0.12442 1
H25 H 1 0.74969 0.35554 0.37437 1
H26 H 1 0.25000 0.64433 0.37435 1
H27 H 1 0.35556 0.25000 0.12443 1
H28 H 1 0.64434 0.75043 0.12453 1
H29 H 1 0.74984 0.85553 0.37446 1
H30 H 1 0.24947 0.14433 0.37459 1
```



|     |   |   |         |         |         |   |
|-----|---|---|---------|---------|---------|---|
| H31 | H | 1 | 0.75000 | 0.64433 | 0.87439 | 1 |
| H32 | H | 1 | 0.36443 | 0.27760 | 0.42070 | 1 |
| H33 | H | 1 | 0.63541 | 0.72225 | 0.42077 | 1 |
| H34 | H | 1 | 0.13474 | 0.27767 | 0.32934 | 1 |
| H35 | H | 1 | 0.86511 | 0.72220 | 0.32943 | 1 |
| H36 | H | 1 | 0.72212 | 0.63469 | 0.57936 | 1 |
| H37 | H | 1 | 0.27758 | 0.36509 | 0.57939 | 1 |
| H38 | H | 1 | 0.22221 | 0.36449 | 0.17074 | 1 |
| H39 | H | 1 | 0.77755 | 0.63550 | 0.17077 | 1 |
| H40 | H | 1 | 0.63471 | 0.22225 | 0.32942 | 1 |
| H41 | H | 1 | 0.36497 | 0.77775 | 0.32936 | 1 |
| H42 | H | 1 | 0.36452 | 0.72237 | 0.92076 | 1 |
| H43 | H | 1 | 0.63554 | 0.27764 | 0.92082 | 1 |
| H44 | H | 1 | 0.27747 | 0.86438 | 0.17075 | 1 |
| H45 | H | 1 | 0.72216 | 0.13534 | 0.17078 | 1 |
| H46 | H | 1 | 0.27784 | 0.63469 | 0.07939 | 1 |
| H47 | H | 1 | 0.72234 | 0.36502 | 0.07943 | 1 |
| H48 | H | 1 | 0.25036 | 0.35553 | 0.87455 | 1 |
| C1  | C | 1 | 0.14570 | 0.80716 | 0.60263 | 1 |
| C2  | C | 1 | 0.95547 | 0.74967 | 0.62472 | 1 |
| C3  | C | 1 | 0.04441 | 0.24976 | 0.62469 | 1 |
| C4  | C | 1 | 0.25000 | 0.95546 | 0.87457 | 1 |
| C5  | C | 1 | 0.75011 | 0.04441 | 0.87458 | 1 |
| C6  | C | 1 | 0.85404 | 0.19268 | 0.60263 | 1 |
| C7  | C | 1 | 0.14589 | 0.69311 | 0.64736 | 1 |
| C8  | C | 1 | 0.85412 | 0.30673 | 0.64736 | 1 |
| C9  | C | 1 | 0.19298 | 0.85402 | 0.39735 | 1 |
| C10 | C | 1 | 0.80663 | 0.14576 | 0.39737 | 1 |
| C11 | C | 1 | 0.80732 | 0.35407 | 0.85263 | 1 |
| C12 | C | 1 | 0.19281 | 0.64571 | 0.85262 | 1 |
| C13 | C | 1 | 0.35411 | 0.19317 | 0.64731 | 1 |
| C14 | C | 1 | 0.64587 | 0.80672 | 0.64730 | 1 |
| C15 | C | 1 | 0.85417 | 0.80720 | 0.10259 | 1 |
| C16 | C | 1 | 0.14583 | 0.19267 | 0.10257 | 1 |
| C17 | C | 1 | 0.30730 | 0.14577 | 0.85256 | 1 |
| C18 | C | 1 | 0.69273 | 0.85412 | 0.85259 | 1 |
| C19 | C | 1 | 0.19325 | 0.14579 | 0.89730 | 1 |
| C20 | C | 1 | 0.80678 | 0.85406 | 0.89733 | 1 |
| C21 | C | 1 | 0.30671 | 0.35407 | 0.39728 | 1 |
| C22 | C | 1 | 0.69312 | 0.64579 | 0.39732 | 1 |
| C23 | C | 1 | 0.19265 | 0.35410 | 0.35255 | 1 |
| C24 | C | 1 | 0.80718 | 0.64576 | 0.35260 | 1 |
| C25 | C | 1 | 0.64574 | 0.69267 | 0.60256 | 1 |
| C26 | C | 1 | 0.35406 | 0.30723 | 0.60257 | 1 |
| C27 | C | 1 | 0.14578 | 0.30673 | 0.14730 | 1 |
| C28 | C | 1 | 0.85405 | 0.69316 | 0.14732 | 1 |
| C29 | C | 1 | 0.69257 | 0.14579 | 0.35263 | 1 |
| C30 | C | 1 | 0.30703 | 0.85414 | 0.35260 | 1 |
| C31 | C | 1 | 0.30687 | 0.64584 | 0.89734 | 1 |
| C32 | C | 1 | 0.69327 | 0.35409 | 0.89736 | 1 |
| C33 | C | 1 | 0.35400 | 0.80676 | 0.14734 | 1 |
| C34 | C | 1 | 0.64575 | 0.19312 | 0.14735 | 1 |
| C35 | C | 1 | 0.35419 | 0.69270 | 0.10260 | 1 |
| C36 | C | 1 | 0.24992 | 0.54441 | 0.37458 | 1 |
| C37 | C | 1 | 0.74984 | 0.45546 | 0.37460 | 1 |
| C38 | C | 1 | 0.45548 | 0.75013 | 0.62454 | 1 |
| C39 | C | 1 | 0.54442 | 0.25000 | 0.62459 | 1 |
| C40 | C | 1 | 0.95548 | 0.24983 | 0.12463 | 1 |
| C41 | C | 1 | 0.04443 | 0.74975 | 0.12458 | 1 |
| C42 | C | 1 | 0.74974 | 0.95545 | 0.37468 | 1 |
| C43 | C | 1 | 0.24966 | 0.04440 | 0.37473 | 1 |
| C44 | C | 1 | 0.25021 | 0.45545 | 0.87471 | 1 |
| C45 | C | 1 | 0.75011 | 0.54441 | 0.87463 | 1 |
| C46 | C | 1 | 0.54442 | 0.75020 | 0.12469 | 1 |
| C47 | C | 1 | 0.45547 | 0.25010 | 0.12466 | 1 |

```
C48 C 1 0.64585 0.30718 0.10263 1
N1 N 1 0.02433 0.84241 0.58622 1
N2 N 1 0.97534 0.15717 0.58621 1
N3 N 1 0.02461 0.65727 0.66341 1
N4 N 1 0.97549 0.34231 0.66340 1
N5 N 1 0.15721 0.97532 0.41342 1
N6 N 1 0.84228 0.02442 0.41341 1
N7 N 1 0.84275 0.47538 0.83617 1
N8 N 1 0.15751 0.52435 0.83621 1
N9 N 1 0.47547 0.15753 0.66331 1
N10 N 1 0.52456 0.84254 0.66328 1
N11 N 1 0.97552 0.84248 0.08611 1
N12 N 1 0.02452 0.15721 0.08615 1
N13 N 1 0.34269 0.02445 0.83610 1
N14 N 1 0.65741 0.97546 0.83611 1
N15 N 1 0.15754 0.02446 0.91330 1
N16 N 1 0.84256 0.97537 0.91333 1
N17 N 1 0.34241 0.47541 0.41329 1
N18 N 1 0.65737 0.52448 0.41333 1
N19 N 1 0.15725 0.47542 0.33611 1
N20 N 1 0.84254 0.52443 0.33614 1
N21 N 1 0.52439 0.65739 0.58609 1
N22 N 1 0.47537 0.34267 0.58612 1
N23 N 1 0.02443 0.34236 0.16334 1
N24 N 1 0.97535 0.65734 0.16332 1
N25 N 1 0.65711 0.02448 0.33620 1
N26 N 1 0.34236 0.97550 0.33621 1
N27 N 1 0.34266 0.52454 0.91340 1
N28 N 1 0.65760 0.47544 0.91337 1
N29 N 1 0.47528 0.84261 0.16339 1
N30 N 1 0.52438 0.15754 0.16337 1
N31 N 1 0.47556 0.65745 0.08619 1
N32 N 1 0.52455 0.34269 0.08619 1
Zn1 Zn 1 0.99986 0.49987 0.24968 1
Zn2 Zn 1 0.49985 0.50000 0.49967 1
Zn3 Zn 1 0.50000 0.00000 0.74966 1
Zn4 Zn 1 0.00000 0.99987 0.99968 1
Zn5 Zn 1 0.99972 0.99979 0.49979 1
Zn6 Zn 1 0.00018 0.49976 0.74975 1
Zn7 Zn 1 0.50021 0.50013 0.99974 1
Zn8 Zn 1 0.49972 0.00009 0.24974 1
#End of data
```

```
data_C6 H6 N4 Zn/dia I41cd Fdd2
_audit_creation_date          2009-12-07
_audit_creation_method        'Igor Baburin'
_chemical_formula_moiety
;
C6 H6 N4 Zn/dia I41cd Fdd2
;
_chemical_formula_sum          'C6 H6 N4 Zn1'
_citation_special_details
;
File: I41cdFdd2.cif.
;
_cell_length_a                 9.9276
_cell_length_b                 9.9276
_cell_length_c                 15.2594
_cell_angle_alpha              90
_cell_angle_beta               90
_cell_angle_gamma              90
_cell_volume                   1503.924
_cell_formula_units_Z          8
_symmetry_space_group_name_H-M 'P 1'
_symmetry_Int_Tables_number    1
_refine_ls_R_factor_all        0
loop_
_symmetry_equiv_pos_site_id
_symmetry_equiv_pos_as_xyz
1 x,y,z
loop_
_atom_site_label
_atom_site_type_symbol
_atom_site_symmetry_multiplicity
_atom_site_fract_x
_atom_site_fract_y
_atom_site_fract_z
_atom_site_occupancy
H1 H 1 0.08240 0.33017 0.58438 1
H2 H 1 0.81574 0.02842 0.49290 1
H3 H 1 0.80905 0.24628 0.37842 1
H4 H 1 0.19095 0.75373 0.37842 1
H5 H 1 0.75367 0.30916 0.62832 1
H6 H 1 0.24633 0.69084 0.62832 1
H7 H 1 0.19095 0.24627 0.87841 1
H8 H 1 0.80905 0.75372 0.87841 1
H9 H 1 0.74633 0.80916 0.62832 1
H10 H 1 0.25367 0.19084 0.62832 1
H11 H 1 0.18426 0.97158 0.49290 1
H12 H 1 0.97160 0.31573 0.74278 1
H13 H 1 0.02840 0.68427 0.74278 1
H14 H 1 0.18426 0.02842 0.99290 1
H15 H 1 0.81574 0.97158 0.99290 1
H16 H 1 0.52840 0.81573 0.74278 1
H17 H 1 0.47160 0.18427 0.74278 1
H18 H 1 0.91760 0.66983 0.58438 1
H19 H 1 0.66993 0.58239 0.83437 1
H20 H 1 0.33007 0.41760 0.83437 1
H21 H 1 0.91760 0.33017 0.08438 1
H22 H 1 0.08240 0.66983 0.08438 1
H23 H 1 0.83007 0.08240 0.83437 1
H24 H 1 0.16993 0.91760 0.83437 1
H25 H 1 0.66993 0.41760 0.33437 1
H26 H 1 0.33007 0.58239 0.33437 1
H27 H 1 0.58240 0.16983 0.58438 1
H28 H 1 0.41760 0.83018 0.58438 1
H29 H 1 0.83007 0.91760 0.33437 1
H30 H 1 0.16993 0.08240 0.33437 1
```

|     |   |   |         |         |         |   |
|-----|---|---|---------|---------|---------|---|
| H31 | H | 1 | 0.41760 | 0.16983 | 0.08438 | 1 |
| H32 | H | 1 | 0.97160 | 0.68428 | 0.24278 | 1 |
| H33 | H | 1 | 0.02840 | 0.31573 | 0.24278 | 1 |
| H34 | H | 1 | 0.31574 | 0.47158 | 0.49290 | 1 |
| H35 | H | 1 | 0.68426 | 0.52842 | 0.49290 | 1 |
| H36 | H | 1 | 0.52840 | 0.18427 | 0.24278 | 1 |
| H37 | H | 1 | 0.47160 | 0.81573 | 0.24278 | 1 |
| H38 | H | 1 | 0.68426 | 0.47158 | 0.99290 | 1 |
| H39 | H | 1 | 0.75367 | 0.69084 | 0.12832 | 1 |
| H40 | H | 1 | 0.24633 | 0.30916 | 0.12832 | 1 |
| H41 | H | 1 | 0.30905 | 0.25373 | 0.37842 | 1 |
| H42 | H | 1 | 0.69095 | 0.74627 | 0.37842 | 1 |
| H43 | H | 1 | 0.74633 | 0.19084 | 0.12832 | 1 |
| H44 | H | 1 | 0.25367 | 0.80915 | 0.12833 | 1 |
| H45 | H | 1 | 0.69095 | 0.25372 | 0.87842 | 1 |
| H46 | H | 1 | 0.30905 | 0.74627 | 0.87842 | 1 |
| H47 | H | 1 | 0.31574 | 0.52842 | 0.99290 | 1 |
| H48 | H | 1 | 0.58240 | 0.83017 | 0.08438 | 1 |
| C1  | C | 1 | 0.00907 | 0.27677 | 0.54403 | 1 |
| C2  | C | 1 | 0.86972 | 0.12397 | 0.49567 | 1 |
| C3  | C | 1 | 0.86626 | 0.23277 | 0.43871 | 1 |
| C4  | C | 1 | 0.13374 | 0.76723 | 0.43871 | 1 |
| C5  | C | 1 | 0.76722 | 0.36632 | 0.68864 | 1 |
| C6  | C | 1 | 0.23278 | 0.63368 | 0.68865 | 1 |
| C7  | C | 1 | 0.13374 | 0.23277 | 0.93871 | 1 |
| C8  | C | 1 | 0.86626 | 0.76723 | 0.93871 | 1 |
| C9  | C | 1 | 0.73278 | 0.86632 | 0.68864 | 1 |
| C10 | C | 1 | 0.26722 | 0.13368 | 0.68864 | 1 |
| C11 | C | 1 | 0.13028 | 0.87603 | 0.49567 | 1 |
| C12 | C | 1 | 0.87605 | 0.36972 | 0.74559 | 1 |
| C13 | C | 1 | 0.12394 | 0.63028 | 0.74559 | 1 |
| C14 | C | 1 | 0.13028 | 0.12397 | 0.99567 | 1 |
| C15 | C | 1 | 0.86972 | 0.87603 | 0.99567 | 1 |
| C16 | C | 1 | 0.62394 | 0.86972 | 0.74559 | 1 |
| C17 | C | 1 | 0.37605 | 0.13028 | 0.74559 | 1 |
| C18 | C | 1 | 0.99093 | 0.72323 | 0.54403 | 1 |
| C19 | C | 1 | 0.72328 | 0.50906 | 0.79400 | 1 |
| C20 | C | 1 | 0.27672 | 0.49094 | 0.79400 | 1 |
| C21 | C | 1 | 0.99093 | 0.27677 | 0.04403 | 1 |
| C22 | C | 1 | 0.00907 | 0.72323 | 0.04403 | 1 |
| C23 | C | 1 | 0.77672 | 0.00906 | 0.79400 | 1 |
| C24 | C | 1 | 0.22328 | 0.99094 | 0.79400 | 1 |
| C25 | C | 1 | 0.72328 | 0.49094 | 0.29400 | 1 |
| C26 | C | 1 | 0.27672 | 0.50906 | 0.29400 | 1 |
| C27 | C | 1 | 0.50907 | 0.22323 | 0.54403 | 1 |
| C28 | C | 1 | 0.49093 | 0.77677 | 0.54403 | 1 |
| C29 | C | 1 | 0.77672 | 0.99094 | 0.29400 | 1 |
| C30 | C | 1 | 0.22328 | 0.00906 | 0.29400 | 1 |
| C31 | C | 1 | 0.49093 | 0.22323 | 0.04403 | 1 |
| C32 | C | 1 | 0.87605 | 0.63028 | 0.24559 | 1 |
| C33 | C | 1 | 0.12395 | 0.36972 | 0.24559 | 1 |
| C34 | C | 1 | 0.36972 | 0.37603 | 0.49567 | 1 |
| C35 | C | 1 | 0.63028 | 0.62397 | 0.49567 | 1 |
| C36 | C | 1 | 0.62395 | 0.13028 | 0.24559 | 1 |
| C37 | C | 1 | 0.37605 | 0.86972 | 0.24559 | 1 |
| C38 | C | 1 | 0.63028 | 0.37603 | 0.99567 | 1 |
| C39 | C | 1 | 0.76722 | 0.63368 | 0.18865 | 1 |
| C40 | C | 1 | 0.23278 | 0.36632 | 0.18865 | 1 |
| C41 | C | 1 | 0.36626 | 0.26723 | 0.43871 | 1 |
| C42 | C | 1 | 0.63374 | 0.73277 | 0.43871 | 1 |
| C43 | C | 1 | 0.73278 | 0.13368 | 0.18864 | 1 |
| C44 | C | 1 | 0.26722 | 0.86632 | 0.18865 | 1 |
| C45 | C | 1 | 0.63374 | 0.26723 | 0.93871 | 1 |
| C46 | C | 1 | 0.36626 | 0.73277 | 0.93871 | 1 |
| C47 | C | 1 | 0.36972 | 0.62397 | 0.99567 | 1 |

```
C48 C 1 0.50907 0.77677 0.04403 1
N1 N 1 0.96051 0.15201 0.56241 1
N2 N 1 0.95479 0.32994 0.46983 1
N3 N 1 0.04521 0.67007 0.46983 1
N4 N 1 0.67008 0.45485 0.71980 1
N5 N 1 0.32992 0.54516 0.71980 1
N6 N 1 0.04521 0.32993 0.96983 1
N7 N 1 0.95479 0.67006 0.96983 1
N8 N 1 0.82992 0.95484 0.71980 1
N9 N 1 0.17008 0.04516 0.71980 1
N10 N 1 0.03949 0.84799 0.56241 1
N11 N 1 0.84803 0.46048 0.81236 1
N12 N 1 0.15197 0.53952 0.81236 1
N13 N 1 0.03949 0.15201 0.06241 1
N14 N 1 0.96051 0.84799 0.06241 1
N15 N 1 0.65197 0.96048 0.81236 1
N16 N 1 0.34803 0.03952 0.81236 1
N17 N 1 0.84803 0.53952 0.31236 1
N18 N 1 0.15197 0.46048 0.31236 1
N19 N 1 0.46051 0.34799 0.56241 1
N20 N 1 0.53949 0.65201 0.56241 1
N21 N 1 0.65197 0.03952 0.31236 1
N22 N 1 0.34803 0.96048 0.31236 1
N23 N 1 0.53949 0.34799 0.06241 1
N24 N 1 0.67008 0.54515 0.21980 1
N25 N 1 0.32992 0.45484 0.21980 1
N26 N 1 0.45480 0.17007 0.46983 1
N27 N 1 0.54520 0.82994 0.46983 1
N28 N 1 0.82992 0.04515 0.21980 1
N29 N 1 0.17008 0.95484 0.21980 1
N30 N 1 0.54520 0.17006 0.96983 1
N31 N 1 0.45479 0.82993 0.96983 1
N32 N 1 0.46051 0.65201 0.06241 1
Zn1 Zn 1 0.50000 0.50000 0.15249 1
Zn2 Zn 1 0.50000 0.00000 0.40249 1
Zn3 Zn 1 0.50000 0.50000 0.65249 1
Zn4 Zn 1 0.00000 0.50000 0.40249 1
Zn5 Zn 1 0.50000 0.00000 0.90249 1
Zn6 Zn 1 0.00000 0.00000 0.15249 1
Zn7 Zn 1 0.00000 0.50000 0.90249 1
Zn8 Zn 1 0.00000 0.00000 0.65249 1
#End of data
```

```
data_C6 H6 N4 Zn/I41acd I42d
_audit_creation_date          2009-12-07
_audit_creation_method        'Igor Baburin'
_chemical_formula_moiety
;
C6 H6 N4 Zn/I41acd I42d
;
_chemical_formula_sum          'C6 H6 N4 Zn1'
_citation_special_details
;
File: I42d.cif.
;
_cell_length_a                 10.9995
_cell_length_b                 10.9995
_cell_length_c                 12.616
_cell_angle_alpha              90
_cell_angle_beta               90
_cell_angle_gamma              90
_cell_volume                   1526.397
_cell_formula_units_Z          8
_symmetry_space_group_name_H-M 'P 1'
_symmetry_Int_Tables_number    1
_refine_ls_R_factor_all        0
loop_
_symmetry_equiv_pos_site_id
_symmetry_equiv_pos_as_xyz
1 x,y,z
loop_
_atom_site_label
_atom_site_type_symbol
_atom_site_symmetry_multiplicity
_atom_site_fract_x
_atom_site_fract_y
_atom_site_fract_z
_atom_site_occupancy
H1 H 1 0.36468 0.26583 0.07586 1
H2 H 1 0.24963 0.62685 0.12460 1
H3 H 1 0.74980 0.37286 0.12469 1
H4 H 1 0.37285 0.74966 0.37516 1
H5 H 1 0.62685 0.24961 0.37528 1
H6 H 1 0.63506 0.73386 0.07578 1
H7 H 1 0.86448 0.73385 0.17406 1
H8 H 1 0.13526 0.26585 0.17413 1
H9 H 1 0.73389 0.63507 0.42421 1
H10 H 1 0.26585 0.36476 0.42402 1
H11 H 1 0.26582 0.13536 0.32574 1
H12 H 1 0.73380 0.86446 0.32591 1
H13 H 1 0.63508 0.23380 0.17423 1
H14 H 1 0.36445 0.76577 0.17414 1
H15 H 1 0.63530 0.26576 0.57587 1
H16 H 1 0.36452 0.73385 0.57598 1
H17 H 1 0.76579 0.36439 0.32579 1
H18 H 1 0.23382 0.63495 0.32569 1
H19 H 1 0.73390 0.36459 0.92397 1
H20 H 1 0.26581 0.63536 0.92416 1
H21 H 1 0.76586 0.13495 0.42398 1
H22 H 1 0.23394 0.86439 0.42394 1
H23 H 1 0.73391 0.13513 0.82580 1
H24 H 1 0.26583 0.86483 0.82598 1
H25 H 1 0.86449 0.23379 0.07593 1
H26 H 1 0.13502 0.76582 0.07587 1
H27 H 1 0.86485 0.26568 0.67395 1
H28 H 1 0.13504 0.73383 0.67411 1
H29 H 1 0.23397 0.36442 0.82606 1
H30 H 1 0.76590 0.63485 0.82600 1
```

|     |   |   |         |         |         |   |
|-----|---|---|---------|---------|---------|---|
| H31 | H | 1 | 0.76576 | 0.86435 | 0.92406 | 1 |
| H32 | H | 1 | 0.23392 | 0.13493 | 0.92418 | 1 |
| H33 | H | 1 | 0.63507 | 0.76578 | 0.67394 | 1 |
| H34 | H | 1 | 0.36458 | 0.23392 | 0.67385 | 1 |
| H35 | H | 1 | 0.13508 | 0.23378 | 0.57573 | 1 |
| H36 | H | 1 | 0.12683 | 0.24987 | 0.37500 | 1 |
| H37 | H | 1 | 0.87287 | 0.74973 | 0.37484 | 1 |
| H38 | H | 1 | 0.37290 | 0.25000 | 0.87465 | 1 |
| H39 | H | 1 | 0.62683 | 0.74972 | 0.87450 | 1 |
| H40 | H | 1 | 0.74966 | 0.87280 | 0.12489 | 1 |
| H41 | H | 1 | 0.24973 | 0.12680 | 0.12500 | 1 |
| H42 | H | 1 | 0.74987 | 0.62672 | 0.62523 | 1 |
| H43 | H | 1 | 0.25000 | 0.37283 | 0.62522 | 1 |
| H44 | H | 1 | 0.12683 | 0.74981 | 0.87487 | 1 |
| H45 | H | 1 | 0.87292 | 0.24972 | 0.87500 | 1 |
| H46 | H | 1 | 0.24991 | 0.87284 | 0.62484 | 1 |
| H47 | H | 1 | 0.75000 | 0.12675 | 0.62485 | 1 |
| H48 | H | 1 | 0.86460 | 0.76572 | 0.57586 | 1 |
| C1  | C | 1 | 0.30635 | 0.34083 | 0.10029 | 1 |
| C2  | C | 1 | 0.24976 | 0.52824 | 0.12469 | 1 |
| C3  | C | 1 | 0.74981 | 0.47147 | 0.12477 | 1 |
| C4  | C | 1 | 0.47146 | 0.74971 | 0.37514 | 1 |
| C5  | C | 1 | 0.52824 | 0.24975 | 0.37520 | 1 |
| C6  | C | 1 | 0.69335 | 0.65888 | 0.10028 | 1 |
| C7  | C | 1 | 0.80620 | 0.65886 | 0.14951 | 1 |
| C8  | C | 1 | 0.19350 | 0.34082 | 0.14952 | 1 |
| C9  | C | 1 | 0.65887 | 0.69332 | 0.39971 | 1 |
| C10 | C | 1 | 0.34085 | 0.30642 | 0.39959 | 1 |
| C11 | C | 1 | 0.34081 | 0.19357 | 0.35035 | 1 |
| C12 | C | 1 | 0.65884 | 0.80616 | 0.35046 | 1 |
| C13 | C | 1 | 0.69332 | 0.15882 | 0.14964 | 1 |
| C14 | C | 1 | 0.30619 | 0.84078 | 0.14961 | 1 |
| C15 | C | 1 | 0.69362 | 0.34071 | 0.60041 | 1 |
| C16 | C | 1 | 0.30625 | 0.65887 | 0.60051 | 1 |
| C17 | C | 1 | 0.84080 | 0.30613 | 0.35030 | 1 |
| C18 | C | 1 | 0.15888 | 0.69326 | 0.35024 | 1 |
| C19 | C | 1 | 0.65890 | 0.30631 | 0.89943 | 1 |
| C20 | C | 1 | 0.34080 | 0.69360 | 0.89956 | 1 |
| C21 | C | 1 | 0.84085 | 0.19326 | 0.39950 | 1 |
| C22 | C | 1 | 0.15891 | 0.80612 | 0.39946 | 1 |
| C23 | C | 1 | 0.65892 | 0.19344 | 0.85025 | 1 |
| C24 | C | 1 | 0.34082 | 0.80647 | 0.85038 | 1 |
| C25 | C | 1 | 0.80618 | 0.15881 | 0.10042 | 1 |
| C26 | C | 1 | 0.19332 | 0.84078 | 0.10042 | 1 |
| C27 | C | 1 | 0.80653 | 0.34070 | 0.64953 | 1 |
| C28 | C | 1 | 0.19336 | 0.65885 | 0.64965 | 1 |
| C29 | C | 1 | 0.15896 | 0.30610 | 0.85047 | 1 |
| C30 | C | 1 | 0.84083 | 0.69323 | 0.85041 | 1 |
| C31 | C | 1 | 0.84078 | 0.80610 | 0.89958 | 1 |
| C32 | C | 1 | 0.15891 | 0.19323 | 0.89967 | 1 |
| C33 | C | 1 | 0.69340 | 0.84076 | 0.64948 | 1 |
| C34 | C | 1 | 0.30630 | 0.15889 | 0.64939 | 1 |
| C35 | C | 1 | 0.19341 | 0.15884 | 0.60024 | 1 |
| C36 | C | 1 | 0.02822 | 0.24978 | 0.37492 | 1 |
| C37 | C | 1 | 0.97149 | 0.74973 | 0.37485 | 1 |
| C38 | C | 1 | 0.47152 | 0.24990 | 0.87470 | 1 |
| C39 | C | 1 | 0.52822 | 0.74983 | 0.87466 | 1 |
| C40 | C | 1 | 0.74968 | 0.97141 | 0.12500 | 1 |
| C41 | C | 1 | 0.24971 | 0.02819 | 0.12500 | 1 |
| C42 | C | 1 | 0.75000 | 0.52811 | 0.62514 | 1 |
| C43 | C | 1 | 0.24990 | 0.47145 | 0.62517 | 1 |
| C44 | C | 1 | 0.02822 | 0.74977 | 0.87500 | 1 |
| C45 | C | 1 | 0.97153 | 0.24972 | 0.87500 | 1 |
| C46 | C | 1 | 0.24990 | 0.97146 | 0.62483 | 1 |
| C47 | C | 1 | 0.75000 | 0.02814 | 0.62488 | 1 |

C48 C 1 0.80630 0.84071 0.60034 1  
N1 N 1 0.34191 0.46008 0.08391 1  
N2 N 1 0.65770 0.53965 0.08395 1  
N3 N 1 0.84187 0.53961 0.16568 1  
N4 N 1 0.15773 0.46006 0.16563 1  
N5 N 1 0.53965 0.65765 0.41600 1  
N6 N 1 0.46012 0.34192 0.41598 1  
N7 N 1 0.46003 0.15775 0.33425 1  
N8 N 1 0.53958 0.84181 0.33424 1  
N9 N 1 0.65762 0.03958 0.16584 1  
N10 N 1 0.34183 0.96003 0.16586 1  
N11 N 1 0.65786 0.45994 0.58430 1  
N12 N 1 0.34199 0.53963 0.58435 1  
N13 N 1 0.96002 0.34185 0.33407 1  
N14 N 1 0.03963 0.65762 0.33400 1  
N15 N 1 0.53965 0.34199 0.91558 1  
N16 N 1 0.46004 0.65780 0.91559 1  
N17 N 1 0.96010 0.15765 0.41575 1  
N18 N 1 0.03968 0.84180 0.41571 1  
N19 N 1 0.53969 0.15777 0.83392 1  
N20 N 1 0.46007 0.84201 0.83394 1  
N21 N 1 0.84179 0.03957 0.08413 1  
N22 N 1 0.15761 0.96002 0.08419 1  
N23 N 1 0.84212 0.45994 0.66585 1  
N24 N 1 0.15775 0.53960 0.66593 1  
N25 N 1 0.03973 0.34180 0.83420 1  
N26 N 1 0.96009 0.65763 0.83415 1  
N27 N 1 0.96000 0.84184 0.91578 1  
N28 N 1 0.03964 0.15759 0.91585 1  
N29 N 1 0.65779 0.96003 0.66567 1  
N30 N 1 0.34200 0.03966 0.66561 1  
N31 N 1 0.15776 0.03959 0.58403 1  
N32 N 1 0.84203 0.95993 0.58410 1  
Zn1 Zn 1 0.99977 0.49971 0.24983 1  
Zn2 Zn 1 0.49976 0.49987 0.99974 1  
Zn3 Zn 1 0.49971 0.99973 0.25010 1  
Zn4 Zn 1 0.49987 0.49974 0.50025 1  
Zn5 Zn 1 0.99966 0.99973 0.00000 1  
Zn6 Zn 1 0.00000 0.49961 0.75010 1  
Zn7 Zn 1 0.99986 0.99964 0.49988 1  
Zn8 Zn 1 0.49985 0.99989 0.74969 1  
#End of data



```
data_C6 H6 N4 Zn/P21212 P212121
_audit_creation_date          2009-12-07
_audit_creation_method        'Igor Baburin'
_chemical_formula_moiety
;
C6 H6 N4 Zn/P21212 P212121
;
_chemical_formula_sum          'C6 H6 N4 Zn1'
_citation_special_details
;
File: P21212.cif.
;
_cell_length_a                 10.939
_cell_length_b                 10.116
_cell_length_c                 7.1148
_cell_angle_alpha              90
_cell_angle_beta               90
_cell_angle_gamma              90
_cell_volume                   787.3161
_cell_formula_units_Z          4
_symmetry_space_group_name_H-M 'P 1'
_symmetry_Int_Tables_number    1
_refine_ls_R_factor_all        0
loop_
_symmetry_equiv_pos_site_id
_symmetry_equiv_pos_as_xyz
1 x,y,z
loop_
_atom_site_label
_atom_site_type_symbol
_atom_site_symmetry_multiplicity
_atom_site_fract_x
_atom_site_fract_y
_atom_site_fract_z
_atom_site_occupancy
H1 H 1 0.43596 0.33395 0.52841 1
H2 H 1 0.56403 0.66604 0.52841 1
H3 H 1 0.93596 0.16604 0.47157 1
H4 H 1 0.40945 0.53923 0.78895 1
H5 H 1 0.59054 0.46077 0.78895 1
H6 H 1 0.90946 0.96077 0.21102 1
H7 H 1 0.14182 0.57825 0.36466 1
H8 H 1 0.85817 0.42175 0.36466 1
H9 H 1 0.64182 0.92175 0.63531 1
H10 H 1 0.49897 0.85710 0.37562 1
H11 H 1 0.50102 0.14290 0.37561 1
H12 H 1 0.99897 0.64290 0.62435 1
H13 H 1 0.27752 0.86002 0.19008 1
H14 H 1 0.72247 0.13997 0.19008 1
H15 H 1 0.77752 0.63997 0.80989 1
H16 H 1 0.54991 0.70449 0.82867 1
H17 H 1 0.45008 0.29551 0.82866 1
H18 H 1 0.04991 0.79550 0.17131 1
H19 H 1 0.95008 0.20448 0.17131 1
H20 H 1 0.22247 0.36003 0.80990 1
H21 H 1 0.00102 0.35710 0.62436 1
H22 H 1 0.35817 0.07825 0.63532 1
H23 H 1 0.09054 0.03922 0.21102 1
H24 H 1 0.06403 0.83395 0.47156 1
C1 C 1 0.36819 0.41264 0.53656 1
C2 C 1 0.63181 0.58735 0.53656 1
C3 C 1 0.86819 0.08735 0.46342 1
C4 C 1 0.35806 0.51694 0.66190 1
C5 C 1 0.64193 0.48306 0.66190 1
C6 C 1 0.85806 0.98306 0.33807 1
```

```
C7 C 1 0.21716 0.53862 0.44817 1
C8 C 1 0.78283 0.46137 0.44817 1
C9 C 1 0.71717 0.96137 0.55181 1
C10 C 1 0.47713 0.82252 0.23463 1
C11 C 1 0.52286 0.17747 0.23463 1
C12 C 1 0.97713 0.67748 0.76534 1
C13 C 1 0.36624 0.82552 0.14083 1
C14 C 1 0.63375 0.17447 0.14083 1
C15 C 1 0.86624 0.67447 0.85914 1
C16 C 1 0.50505 0.74513 0.95251 1
C17 C 1 0.49495 0.25487 0.95251 1
C18 C 1 0.00505 0.75487 0.04746 1
C19 C 1 0.99495 0.24513 0.04746 1
C20 C 1 0.13375 0.32553 0.85914 1
C21 C 1 0.02286 0.32252 0.76534 1
C22 C 1 0.28283 0.03863 0.55181 1
C23 C 1 0.14193 0.01694 0.33807 1
C24 C 1 0.13181 0.91264 0.46342 1
N1 N 1 0.27784 0.42554 0.40197 1
N2 N 1 0.72215 0.57445 0.40197 1
N3 N 1 0.77784 0.07445 0.59800 1
N4 N 1 0.26301 0.59762 0.60533 1
N5 N 1 0.73698 0.40237 0.60533 1
N6 N 1 0.76301 0.90237 0.39464 1
N7 N 1 0.56536 0.77082 0.11547 1
N8 N 1 0.43464 0.22917 0.11547 1
N9 N 1 0.06536 0.72918 0.88451 1
N10 N 1 0.38363 0.77653 0.96073 1
N11 N 1 0.61636 0.22346 0.96073 1
N12 N 1 0.88363 0.72346 0.03924 1
N13 N 1 0.11636 0.27653 0.03924 1
N14 N 1 0.93464 0.27082 0.88451 1
N15 N 1 0.23698 0.09762 0.39464 1
N16 N 1 0.22215 0.92554 0.59800 1
Zn1 Zn 1 0.23920 0.76481 0.77587 1
Zn2 Zn 1 0.76079 0.23519 0.77587 1
Zn3 Zn 1 0.73920 0.73519 0.22410 1
Zn4 Zn 1 0.26079 0.26481 0.22410 1
#End of data
```

```
data_C6 H6 N4 Zn/P41212 - P212121
_audit_creation_date          2009-12-07
_audit_creation_method        'Igor Baburin'
_chemical_formula_moiety
;
C6 H6 N4 Zn/P41212 - P212121
;
_chemical_formula_sum          'C6 H6 N4 Zn1'
_citation_special_details
;
File: P41212P212121.cif.
;
_cell_length_a                 10.6305
_cell_length_b                 10.6305
_cell_length_c                 13.5254
_cell_angle_alpha              90
_cell_angle_beta               90
_cell_angle_gamma              90
_cell_volume                   1528.472
_cell_formula_units_Z          8
_symmetry_space_group_name_H-M 'P 1'
_symmetry_Int_Tables_number    1
_refine_ls_R_factor_all        0
loop_
_symmetry_equiv_pos_site_id
_symmetry_equiv_pos_as_xyz
1 x,y,z
loop_
_atom_site_label
_atom_site_type_symbol
_atom_site_symmetry_multiplicity
_atom_site_fract_x
_atom_site_fract_y
_atom_site_fract_z
_atom_site_occupancy
H1 H 1 0.46542 0.05068 0.98127 1
H2 H 1 0.03456 0.94933 0.48128 1
H3 H 1 0.53453 0.55075 0.51881 1
H4 H 1 0.96545 0.44924 0.01881 1
H5 H 1 0.69926 0.28459 0.76876 1
H6 H 1 0.80073 0.71540 0.26876 1
H7 H 1 0.19931 0.21539 0.23132 1
H8 H 1 0.25198 0.02805 0.86493 1
H9 H 1 0.24801 0.97194 0.36493 1
H10 H 1 0.74797 0.52818 0.63516 1
H11 H 1 0.75201 0.47182 0.13516 1
H12 H 1 0.72190 0.49802 0.88511 1
H13 H 1 0.77809 0.50197 0.38512 1
H14 H 1 0.22199 0.00196 0.11497 1
H15 H 1 0.22298 0.35523 0.04102 1
H16 H 1 0.27701 0.64477 0.54102 1
H17 H 1 0.77707 0.85516 0.45886 1
H18 H 1 0.72291 0.14483 0.95886 1
H19 H 1 0.39479 0.52705 0.70891 1
H20 H 1 0.10520 0.47294 0.20891 1
H21 H 1 0.89472 0.97301 0.29100 1
H22 H 1 0.74768 0.89074 0.69634 1
H23 H 1 0.75230 0.10925 0.19634 1
H24 H 1 0.25233 0.39052 0.80336 1
H25 H 1 0.24765 0.60948 0.30336 1
H26 H 1 0.85958 0.00233 0.05324 1
H27 H 1 0.64040 0.99767 0.55324 1
H28 H 1 0.35935 0.49769 0.94645 1
H29 H 1 0.77231 0.11713 0.80013 1
H30 H 1 0.72768 0.88286 0.30013 1
```

|     |   |   |         |         |         |   |
|-----|---|---|---------|---------|---------|---|
| H31 | H | 1 | 0.22771 | 0.61691 | 0.69957 | 1 |
| H32 | H | 1 | 0.27228 | 0.38309 | 0.19957 | 1 |
| H33 | H | 1 | 0.63317 | 0.97775 | 0.94946 | 1 |
| H34 | H | 1 | 0.86681 | 0.02224 | 0.44946 | 1 |
| H35 | H | 1 | 0.13295 | 0.52229 | 0.05024 | 1 |
| H36 | H | 1 | 0.13217 | 0.96143 | 0.75213 | 1 |
| H37 | H | 1 | 0.36781 | 0.03856 | 0.25213 | 1 |
| H38 | H | 1 | 0.86779 | 0.46161 | 0.74808 | 1 |
| H39 | H | 1 | 0.63219 | 0.53838 | 0.24808 | 1 |
| H40 | H | 1 | 0.78830 | 0.61779 | 0.99817 | 1 |
| H41 | H | 1 | 0.71169 | 0.38221 | 0.49817 | 1 |
| H42 | H | 1 | 0.28848 | 0.88218 | 0.00207 | 1 |
| H43 | H | 1 | 0.21151 | 0.11781 | 0.50207 | 1 |
| H44 | H | 1 | 0.36703 | 0.47771 | 0.55024 | 1 |
| H45 | H | 1 | 0.14063 | 0.50230 | 0.44645 | 1 |
| H46 | H | 1 | 0.60526 | 0.02698 | 0.79101 | 1 |
| H47 | H | 1 | 0.27800 | 0.99802 | 0.61497 | 1 |
| H48 | H | 1 | 0.30068 | 0.78460 | 0.73132 | 1 |
| C1  | C | 1 | 0.38388 | 0.11229 | 0.97596 | 1 |
| C2  | C | 1 | 0.11609 | 0.88770 | 0.47596 | 1 |
| C3  | C | 1 | 0.61608 | 0.61235 | 0.52408 | 1 |
| C4  | C | 1 | 0.88390 | 0.38764 | 0.02409 | 1 |
| C5  | C | 1 | 0.63768 | 0.36613 | 0.77407 | 1 |
| C6  | C | 1 | 0.86231 | 0.63386 | 0.27407 | 1 |
| C7  | C | 1 | 0.13772 | 0.13387 | 0.22597 | 1 |
| C8  | C | 1 | 0.27580 | 0.09994 | 0.91913 | 1 |
| C9  | C | 1 | 0.22418 | 0.90005 | 0.41914 | 1 |
| C10 | C | 1 | 0.72416 | 0.60002 | 0.58091 | 1 |
| C11 | C | 1 | 0.77582 | 0.39997 | 0.08091 | 1 |
| C12 | C | 1 | 0.65001 | 0.47422 | 0.83090 | 1 |
| C13 | C | 1 | 0.84998 | 0.52578 | 0.33090 | 1 |
| C14 | C | 1 | 0.15007 | 0.02578 | 0.16915 | 1 |
| C15 | C | 1 | 0.25979 | 0.26914 | 0.00871 | 1 |
| C16 | C | 1 | 0.24019 | 0.73085 | 0.50871 | 1 |
| C17 | C | 1 | 0.74022 | 0.76913 | 0.49124 | 1 |
| C18 | C | 1 | 0.75976 | 0.23086 | 0.99124 | 1 |
| C19 | C | 1 | 0.48085 | 0.49024 | 0.74127 | 1 |
| C20 | C | 1 | 0.01913 | 0.50975 | 0.24127 | 1 |
| C21 | C | 1 | 0.98083 | 0.00979 | 0.25869 | 1 |
| C22 | C | 1 | 0.83122 | 0.93889 | 0.72348 | 1 |
| C23 | C | 1 | 0.66877 | 0.06110 | 0.22348 | 1 |
| C24 | C | 1 | 0.16879 | 0.43875 | 0.77633 | 1 |
| C25 | C | 1 | 0.33119 | 0.56124 | 0.27633 | 1 |
| C26 | C | 1 | 0.81130 | 0.91880 | 0.02625 | 1 |
| C27 | C | 1 | 0.68868 | 0.08120 | 0.52625 | 1 |
| C28 | C | 1 | 0.31117 | 0.58121 | 0.97356 | 1 |
| C29 | C | 1 | 0.84334 | 0.05066 | 0.77524 | 1 |
| C30 | C | 1 | 0.65664 | 0.94934 | 0.27524 | 1 |
| C31 | C | 1 | 0.15667 | 0.55051 | 0.72457 | 1 |
| C32 | C | 1 | 0.34332 | 0.44947 | 0.22457 | 1 |
| C33 | C | 1 | 0.69954 | 0.90669 | 0.97450 | 1 |
| C34 | C | 1 | 0.80045 | 0.09330 | 0.47449 | 1 |
| C35 | C | 1 | 0.19940 | 0.59333 | 0.02531 | 1 |
| C36 | C | 1 | 0.03033 | 0.97303 | 0.75210 | 1 |
| C37 | C | 1 | 0.46965 | 0.02697 | 0.25209 | 1 |
| C38 | C | 1 | 0.96964 | 0.47308 | 0.74799 | 1 |
| C39 | C | 1 | 0.53034 | 0.52690 | 0.24799 | 1 |
| C40 | C | 1 | 0.77687 | 0.71964 | 0.99803 | 1 |
| C41 | C | 1 | 0.72311 | 0.28035 | 0.49803 | 1 |
| C42 | C | 1 | 0.27695 | 0.78035 | 0.00207 | 1 |
| C43 | C | 1 | 0.22304 | 0.21965 | 0.50206 | 1 |
| C44 | C | 1 | 0.30059 | 0.40666 | 0.52532 | 1 |
| C45 | C | 1 | 0.18882 | 0.41878 | 0.47356 | 1 |
| C46 | C | 1 | 0.51916 | 0.99020 | 0.75869 | 1 |
| C47 | C | 1 | 0.34992 | 0.97421 | 0.66915 | 1 |

C48 C 1 0.36227 0.86612 0.72597 1  
N1 N 1 0.37408 0.22041 0.03282 1  
N2 N 1 0.12590 0.77958 0.53282 1  
N3 N 1 0.62592 0.72041 0.46716 1  
N4 N 1 0.87406 0.27958 0.96716 1  
N5 N 1 0.52959 0.37595 0.71718 1  
N6 N 1 0.97040 0.62404 0.21718 1  
N7 N 1 0.02958 0.12406 0.28281 1  
N8 N 1 0.19632 0.19979 0.94042 1  
N9 N 1 0.30366 0.80020 0.44042 1  
N10 N 1 0.80368 0.69982 0.55956 1  
N11 N 1 0.69630 0.30017 0.05957 1  
N12 N 1 0.55018 0.55371 0.80959 1  
N13 N 1 0.94981 0.44628 0.30959 1  
N14 N 1 0.05020 0.94631 0.19041 1  
N15 N 1 0.95033 0.88998 0.70860 1  
N16 N 1 0.54965 0.11001 0.20860 1  
N17 N 1 0.04965 0.38998 0.79138 1  
N18 N 1 0.45033 0.61002 0.29138 1  
N19 N 1 0.86003 0.79965 0.04138 1  
N20 N 1 0.63996 0.20034 0.54138 1  
N21 N 1 0.36002 0.70034 0.95861 1  
N22 N 1 0.96958 0.07235 0.79392 1  
N23 N 1 0.53040 0.92763 0.29392 1  
N24 N 1 0.03041 0.57234 0.70606 1  
N25 N 1 0.46957 0.42766 0.20606 1  
N26 N 1 0.67766 0.78043 0.95607 1  
N27 N 1 0.82233 0.21957 0.45607 1  
N28 N 1 0.17765 0.71957 0.04392 1  
N29 N 1 0.32233 0.28042 0.54392 1  
N30 N 1 0.13996 0.29965 0.45861 1  
N31 N 1 0.44979 0.05368 0.69041 1  
N32 N 1 0.47041 0.87593 0.78281 1  
Zn1 Zn 1 0.02210 0.22813 0.87288 1  
Zn2 Zn 1 0.47790 0.77186 0.37287 1  
Zn3 Zn 1 0.97790 0.72813 0.62712 1  
Zn4 Zn 1 0.52210 0.27187 0.12712 1  
Zn5 Zn 1 0.52187 0.72788 0.87713 1  
Zn6 Zn 1 0.97811 0.27213 0.37713 1  
Zn7 Zn 1 0.02188 0.77215 0.12287 1  
Zn8 Zn 1 0.47809 0.22782 0.62288 1  
#End of data

```
data_C6 H6 N4 Zn/P41212 P41
_audit_creation_date          2009-12-07
_audit_creation_method        'Igor Baburin'
_chemical_formula_moiety
;
C6 H6 N4 Zn/P41212 P41
;
_chemical_formula_sum          'C6 H6 N4 Zn1'
_citation_special_details
;
File: P41212_P41.cif.
;
_cell_length_a                 10.1602
_cell_length_b                 10.1602
_cell_length_c                 14.9787
_cell_angle_alpha              90
_cell_angle_beta               90
_cell_angle_gamma              90
_cell_volume                   1546.246
_cell_formula_units_Z          8
_symmetry_space_group_name_H-M 'P 1'
_symmetry_Int_Tables_number    1
_refine_ls_R_factor_all        0
loop_
_symmetry_equiv_pos_site_id
_symmetry_equiv_pos_as_xyz
1 x,y,z
loop_
_atom_site_label
_atom_site_type_symbol
_atom_site_symmetry_multiplicity
_atom_site_fract_x
_atom_site_fract_y
_atom_site_fract_z
_atom_site_occupancy
H1 H 1 0.39088 0.50775 0.06136 1
H2 H 1 0.60912 0.49225 0.56136 1
H3 H 1 0.10912 0.00776 0.18864 1
H4 H 1 0.89088 0.99224 0.68865 1
H5 H 1 0.49225 0.60912 0.43864 1
H6 H 1 0.50775 0.39088 0.93864 1
H7 H 1 0.99224 0.89088 0.31135 1
H8 H 1 0.59912 0.51741 0.18001 1
H9 H 1 0.40088 0.48259 0.68001 1
H10 H 1 0.90088 0.01741 0.06999 1
H11 H 1 0.09912 0.98259 0.56999 1
H12 H 1 0.48259 0.40088 0.31999 1
H13 H 1 0.51741 0.59912 0.81999 1
H14 H 1 0.98259 0.09912 0.43001 1
H15 H 1 0.52314 0.90220 0.08380 1
H16 H 1 0.47687 0.09780 0.58381 1
H17 H 1 0.97686 0.40220 0.16619 1
H18 H 1 0.02314 0.59780 0.66620 1
H19 H 1 0.09780 0.47687 0.41619 1
H20 H 1 0.90220 0.52314 0.91620 1
H21 H 1 0.59780 0.02314 0.33381 1
H22 H 1 0.85510 0.52731 0.53608 1
H23 H 1 0.14490 0.47269 0.03608 1
H24 H 1 0.64490 0.02731 0.71392 1
H25 H 1 0.35509 0.97269 0.21392 1
H26 H 1 0.47269 0.14490 0.96392 1
H27 H 1 0.52731 0.85510 0.46392 1
H28 H 1 0.97269 0.35509 0.78608 1
H29 H 1 0.84028 0.75222 0.43041 1
H30 H 1 0.15972 0.24778 0.93041 1
```

|     |   |   |         |         |         |   |
|-----|---|---|---------|---------|---------|---|
| H31 | H | 1 | 0.65972 | 0.25221 | 0.81959 | 1 |
| H32 | H | 1 | 0.34028 | 0.74779 | 0.31959 | 1 |
| H33 | H | 1 | 0.24778 | 0.15972 | 0.06959 | 1 |
| H34 | H | 1 | 0.75222 | 0.84028 | 0.56959 | 1 |
| H35 | H | 1 | 0.74779 | 0.34028 | 0.68041 | 1 |
| H36 | H | 1 | 0.72014 | 0.42191 | 0.27917 | 1 |
| H37 | H | 1 | 0.27987 | 0.57808 | 0.77917 | 1 |
| H38 | H | 1 | 0.77987 | 0.92191 | 0.97083 | 1 |
| H39 | H | 1 | 0.22013 | 0.07809 | 0.47083 | 1 |
| H40 | H | 1 | 0.57808 | 0.27987 | 0.22083 | 1 |
| H41 | H | 1 | 0.42191 | 0.72014 | 0.72083 | 1 |
| H42 | H | 1 | 0.07809 | 0.22013 | 0.52917 | 1 |
| H43 | H | 1 | 0.92192 | 0.77987 | 0.02917 | 1 |
| H44 | H | 1 | 0.25222 | 0.65972 | 0.18041 | 1 |
| H45 | H | 1 | 0.02731 | 0.64490 | 0.28608 | 1 |
| H46 | H | 1 | 0.40220 | 0.97686 | 0.83381 | 1 |
| H47 | H | 1 | 0.01741 | 0.90088 | 0.93001 | 1 |
| H48 | H | 1 | 0.00776 | 0.10912 | 0.81135 | 1 |
| C1  | C | 1 | 0.44875 | 0.59188 | 0.08352 | 1 |
| C2  | C | 1 | 0.55125 | 0.40812 | 0.58352 | 1 |
| C3  | C | 1 | 0.05125 | 0.09189 | 0.16648 | 1 |
| C4  | C | 1 | 0.94875 | 0.90812 | 0.66648 | 1 |
| C5  | C | 1 | 0.40812 | 0.55125 | 0.41648 | 1 |
| C6  | C | 1 | 0.59188 | 0.44875 | 0.91648 | 1 |
| C7  | C | 1 | 0.90812 | 0.94875 | 0.33352 | 1 |
| C8  | C | 1 | 0.55286 | 0.59666 | 0.14275 | 1 |
| C9  | C | 1 | 0.44715 | 0.40334 | 0.64275 | 1 |
| C10 | C | 1 | 0.94714 | 0.09667 | 0.10725 | 1 |
| C11 | C | 1 | 0.05286 | 0.90333 | 0.60726 | 1 |
| C12 | C | 1 | 0.40333 | 0.44714 | 0.35725 | 1 |
| C13 | C | 1 | 0.59666 | 0.55286 | 0.85725 | 1 |
| C14 | C | 1 | 0.90333 | 0.05286 | 0.39274 | 1 |
| C15 | C | 1 | 0.51582 | 0.79594 | 0.09394 | 1 |
| C16 | C | 1 | 0.48418 | 0.20406 | 0.59394 | 1 |
| C17 | C | 1 | 0.98418 | 0.29594 | 0.15606 | 1 |
| C18 | C | 1 | 0.01582 | 0.70406 | 0.65606 | 1 |
| C19 | C | 1 | 0.20406 | 0.48418 | 0.40606 | 1 |
| C20 | C | 1 | 0.79594 | 0.51582 | 0.90606 | 1 |
| C21 | C | 1 | 0.70406 | 0.01582 | 0.34394 | 1 |
| C22 | C | 1 | 0.82344 | 0.53846 | 0.46694 | 1 |
| C23 | C | 1 | 0.17656 | 0.46154 | 0.96694 | 1 |
| C24 | C | 1 | 0.67656 | 0.03845 | 0.78306 | 1 |
| C25 | C | 1 | 0.32344 | 0.96155 | 0.28306 | 1 |
| C26 | C | 1 | 0.46154 | 0.17656 | 0.03306 | 1 |
| C27 | C | 1 | 0.53846 | 0.82344 | 0.53306 | 1 |
| C28 | C | 1 | 0.96155 | 0.32344 | 0.71694 | 1 |
| C29 | C | 1 | 0.81564 | 0.65058 | 0.41433 | 1 |
| C30 | C | 1 | 0.18436 | 0.34942 | 0.91433 | 1 |
| C31 | C | 1 | 0.68436 | 0.15058 | 0.83567 | 1 |
| C32 | C | 1 | 0.31564 | 0.84942 | 0.33567 | 1 |
| C33 | C | 1 | 0.34942 | 0.18436 | 0.08567 | 1 |
| C34 | C | 1 | 0.65058 | 0.81564 | 0.58567 | 1 |
| C35 | C | 1 | 0.84942 | 0.31564 | 0.66433 | 1 |
| C36 | C | 1 | 0.75065 | 0.48273 | 0.33553 | 1 |
| C37 | C | 1 | 0.24936 | 0.51727 | 0.83553 | 1 |
| C38 | C | 1 | 0.74936 | 0.98273 | 0.91447 | 1 |
| C39 | C | 1 | 0.25064 | 0.01727 | 0.41447 | 1 |
| C40 | C | 1 | 0.51727 | 0.24936 | 0.16447 | 1 |
| C41 | C | 1 | 0.48273 | 0.75065 | 0.66447 | 1 |
| C42 | C | 1 | 0.01727 | 0.25064 | 0.58553 | 1 |
| C43 | C | 1 | 0.98273 | 0.74936 | 0.08553 | 1 |
| C44 | C | 1 | 0.15058 | 0.68436 | 0.16433 | 1 |
| C45 | C | 1 | 0.03846 | 0.67656 | 0.21694 | 1 |
| C46 | C | 1 | 0.29594 | 0.98418 | 0.84394 | 1 |
| C47 | C | 1 | 0.09667 | 0.94714 | 0.89275 | 1 |

C48 C 1 0.09188 0.05125 0.83352 1  
N1 N 1 0.42526 0.71840 0.05245 1  
N2 N 1 0.57475 0.28160 0.55246 1  
N3 N 1 0.07474 0.21840 0.19755 1  
N4 N 1 0.92526 0.78160 0.69755 1  
N5 N 1 0.28160 0.57475 0.44754 1  
N6 N 1 0.71840 0.42525 0.94755 1  
N7 N 1 0.78160 0.92526 0.30245 1  
N8 N 1 0.59578 0.72584 0.14946 1  
N9 N 1 0.40423 0.27415 0.64946 1  
N10 N 1 0.90422 0.22585 0.10054 1  
N11 N 1 0.09578 0.77415 0.60054 1  
N12 N 1 0.27415 0.40423 0.35054 1  
N13 N 1 0.72585 0.59578 0.85054 1  
N14 N 1 0.77415 0.09578 0.39946 1  
N15 N 1 0.78109 0.43167 0.41667 1  
N16 N 1 0.21891 0.56833 0.91667 1  
N17 N 1 0.71891 0.93167 0.83333 1  
N18 N 1 0.28108 0.06833 0.33333 1  
N19 N 1 0.56833 0.21891 0.08333 1  
N20 N 1 0.43167 0.78109 0.58325 1  
N21 N 1 0.06833 0.28108 0.66667 1  
N22 N 1 0.76893 0.61514 0.33065 1  
N23 N 1 0.23107 0.38485 0.83065 1  
N24 N 1 0.73107 0.11514 0.91935 1  
N25 N 1 0.26893 0.88486 0.41935 1  
N26 N 1 0.38485 0.23107 0.16935 1  
N27 N 1 0.61514 0.76893 0.66935 1  
N28 N 1 0.88486 0.26893 0.58065 1  
N29 N 1 0.11515 0.73107 0.08065 1  
N30 N 1 0.93167 0.71892 0.16667 1  
N31 N 1 0.22585 0.90422 0.89946 1  
N32 N 1 0.21840 0.07474 0.80245 1  
Zn1 Zn 1 0.75354 0.75663 0.22931 1  
Zn2 Zn 1 0.24646 0.24336 0.72931 1  
Zn3 Zn 1 0.74645 0.25664 0.02069 1  
Zn4 Zn 1 0.25354 0.74337 0.52069 1  
Zn5 Zn 1 0.24336 0.24646 0.27069 1  
Zn6 Zn 1 0.75663 0.75354 0.77069 1  
Zn7 Zn 1 0.74337 0.25354 0.47931 1  
Zn8 Zn 1 0.25664 0.74645 0.97931 1  
#End of data



```
data_C6 H6 N4 Zn/P42 I41
_audit_creation_date          2009-12-07
_audit_creation_method        'Igor Baburin'
_chemical_formula_moiety
;
C6 H6 N4 Zn/P42 I41
;
_chemical_formula_sum          'C6 H6 N4 Zn1'
_citation_special_details
;
File: P42_I41.cif.
;
_cell_length_a                 7.3214
_cell_length_b                 7.3214
_cell_length_c                 7.3889
_cell_angle_alpha              90
_cell_angle_beta               90
_cell_angle_gamma              90
_cell_volume                   396.0665
_cell_formula_units_Z          2
_symmetry_space_group_name_H-M 'P 1'
_symmetry_Int_Tables_number    1
_refine_ls_R_factor_all        0
loop_
_symmetry_equiv_pos_site_id
_symmetry_equiv_pos_as_xyz
1 x,y,z
loop_
_atom_site_label
_atom_site_type_symbol
_atom_site_symmetry_multiplicity
_atom_site_fract_x
_atom_site_fract_y
_atom_site_fract_z
_atom_site_occupancy
H1 H 1 0.72492 0.57875 0.46938 1
H2 H 1 0.27508 0.42125 0.46938 1
H3 H 1 0.57875 0.27508 0.96938 1
H4 H 1 0.88061 0.88729 0.00945 1
H5 H 1 0.11939 0.11271 0.00945 1
H6 H 1 0.88729 0.11939 0.50945 1
H7 H 1 0.66567 0.10238 0.23316 1
H8 H 1 0.33433 0.89762 0.23316 1
H9 H 1 0.10238 0.33433 0.73316 1
H10 H 1 0.89762 0.66567 0.73316 1
H11 H 1 0.11271 0.88061 0.50945 1
H12 H 1 0.42125 0.72492 0.96938 1
C1 C 1 0.73816 0.69321 0.37548 1
C2 C 1 0.26184 0.30679 0.37548 1
C3 C 1 0.69321 0.26184 0.87548 1
C4 C 1 0.81654 0.85423 0.13831 1
C5 C 1 0.18346 0.14577 0.13831 1
C6 C 1 0.85423 0.18346 0.63831 1
C7 C 1 0.70987 0.96154 0.25018 1
C8 C 1 0.29013 0.03846 0.25018 1
C9 C 1 0.96154 0.29013 0.75018 1
C10 C 1 0.03846 0.70987 0.75018 1
C11 C 1 0.14577 0.81654 0.63831 1
C12 C 1 0.30679 0.73816 0.87548 1
N1 N 1 0.83545 0.68368 0.21834 1
N2 N 1 0.16455 0.31632 0.21834 1
N3 N 1 0.68368 0.16455 0.71834 1
N4 N 1 0.65942 0.85959 0.40064 1
N5 N 1 0.34058 0.14041 0.40064 1
N6 N 1 0.85959 0.34058 0.90064 1
```

```
N7 N 1 0.14041 0.65942 0.90064 1  
N8 N 1 0.31632 0.83545 0.71834 1  
Zn1 Zn 1 0.00000 0.50000 0.09239 1  
Zn2 Zn 1 0.50000 0.00000 0.59239 1  
#End of data
```

```
data_C6 H6 N4 Zn/P42 P41
_audit_creation_date          2009-12-07
_audit_creation_method        'Igor Baburin'
_chemical_formula_moiety
;
C6 H6 N4 Zn/P42 P41
;
_chemical_formula_sum          'C6 H6 N4 Zn1'
_citation_special_details
;
File: P42_P41.cif.
;
_cell_length_a                 10.354
_cell_length_b                 10.354
_cell_length_c                 7.3889
_cell_angle_alpha              90
_cell_angle_beta               90
_cell_angle_gamma              90
_cell_volume                   792.1294
_cell_formula_units_Z          4
_symmetry_space_group_name_H-M 'P 1'
_symmetry_Int_Tables_number    1
_refine_ls_R_factor_all        0
loop_
_symmetry_equiv_pos_site_id
_symmetry_equiv_pos_as_xyz
1 x,y,z
loop_
_atom_site_label
_atom_site_type_symbol
_atom_site_symmetry_multiplicity
_atom_site_fract_x
_atom_site_fract_y
_atom_site_fract_z
_atom_site_occupancy
H1 H 1 0.71572 0.88655 0.26623 1
H2 H 1 0.28429 0.11339 0.26623 1
H3 H 1 0.88657 0.28426 0.76625 1
H4 H 1 0.50125 0.88381 0.49097 1
H5 H 1 0.49876 0.11613 0.49097 1
H6 H 1 0.88383 0.49875 0.99097 1
H7 H 1 0.42612 0.65167 0.03072 1
H8 H 1 0.57389 0.34828 0.03071 1
H9 H 1 0.65170 0.57386 0.53070 1
H10 H 1 0.38409 0.99420 0.99007 1
H11 H 1 0.61592 0.00574 0.99007 1
H12 H 1 0.99424 0.61589 0.49007 1
H13 H 1 0.38116 0.77860 0.76750 1
H14 H 1 0.61884 0.22135 0.76750 1
H15 H 1 0.77862 0.61882 0.26751 1
H16 H 1 0.15202 0.07211 0.53054 1
H17 H 1 0.84800 0.92783 0.53053 1
H18 H 1 0.07215 0.84796 0.03053 1
H19 H 1 0.92785 0.15198 0.03053 1
H20 H 1 0.22138 0.38112 0.26751 1
H21 H 1 0.00577 0.38405 0.49008 1
H22 H 1 0.34831 0.42608 0.53070 1
H23 H 1 0.11616 0.50119 0.99097 1
H24 H 1 0.11343 0.71568 0.76625 1
C1 C 1 0.62367 0.83726 0.24946 1
C2 C 1 0.37634 0.16267 0.24947 1
C3 C 1 0.83729 0.37632 0.74947 1
C4 C 1 0.51695 0.83565 0.36186 1
C5 C 1 0.48306 0.16429 0.36186 1
C6 C 1 0.83567 0.48304 0.86185 1
```

```
C7 C 1 0.47628 0.71592 0.12452 1
C8 C 1 0.52372 0.28402 0.12452 1
C9 C 1 0.71596 0.52370 0.62451 1
C10 C 1 0.33507 0.97893 0.86150 1
C11 C 1 0.66494 0.02101 0.86150 1
C12 C 1 0.97896 0.66491 0.36150 1
C13 C 1 0.33392 0.87164 0.75020 1
C14 C 1 0.66607 0.12831 0.75020 1
C15 C 1 0.87167 0.66606 0.25019 1
C16 C 1 0.21539 0.02099 0.62454 1
C17 C 1 0.78462 0.97895 0.62454 1
C18 C 1 0.02103 0.78458 0.12454 1
C19 C 1 0.97897 0.21536 0.12454 1
C20 C 1 0.12833 0.33388 0.25020 1
C21 C 1 0.02104 0.33503 0.36150 1
C22 C 1 0.28405 0.47625 0.62451 1
C23 C 1 0.16432 0.51690 0.86186 1
C24 C 1 0.16271 0.62363 0.74948 1
N1 N 1 0.59834 0.76103 0.09890 1
N2 N 1 0.40167 0.23891 0.09889 1
N3 N 1 0.76106 0.40164 0.59890 1
N4 N 1 0.42278 0.75903 0.28201 1
N5 N 1 0.57722 0.24090 0.28201 1
N6 N 1 0.75906 0.57720 0.78200 1
N7 N 1 0.26015 0.07429 0.78128 1
N8 N 1 0.73986 0.92565 0.78128 1
N9 N 1 0.07433 0.73982 0.28127 1
N10 N 1 0.25777 0.89788 0.59989 1
N11 N 1 0.74223 0.10207 0.59988 1
N12 N 1 0.89791 0.74221 0.09988 1
N13 N 1 0.10210 0.25773 0.09988 1
N14 N 1 0.92568 0.26012 0.28128 1
N15 N 1 0.24094 0.42274 0.78200 1
N16 N 1 0.23895 0.59831 0.59890 1
Zn1 Zn 1 0.24843 0.74843 0.40761 1
Zn2 Zn 1 0.75158 0.25151 0.40761 1
Zn3 Zn 1 0.74847 0.75155 0.90760 1
Zn4 Zn 1 0.25154 0.24839 0.90761 1
#End of data
```

```
data_C6 H6 N4 Zn/Pbca P212121
_audit_creation_date          2009-12-07
_audit_creation_method        'Igor Baburin'
_chemical_formula_moiety
;
C6 H6 N4 Zn/Pbca P212121
;
_chemical_formula_sum          'C6 H6 N4 Zn1'
_citation_special_details
;
File: Pbca_P212121.cif.
;
_cell_length_a                 10.3908
_cell_length_b                 9.8596
_cell_length_c                 14.353
_cell_angle_alpha              90
_cell_angle_beta               90
_cell_angle_gamma              90
_cell_volume                   1470.452
_cell_formula_units_Z          8
_symmetry_space_group_name_H-M 'P 1'
_symmetry_Int_Tables_number    1
_refine_ls_R_factor_all        0
loop_
_symmetry_equiv_pos_site_id
_symmetry_equiv_pos_as_xyz
1 x,y,z
loop_
_atom_site_label
_atom_site_type_symbol
_atom_site_symmetry_multiplicity
_atom_site_fract_x
_atom_site_fract_y
_atom_site_fract_z
_atom_site_occupancy
H1 H 1 0.28514 0.73544 0.22185 1
H2 H 1 0.21486 0.26455 0.72186 1
H3 H 1 0.78516 0.76452 0.77815 1
H4 H 1 0.71484 0.23547 0.27815 1
H5 H 1 0.71483 0.26453 0.77815 1
H6 H 1 0.78516 0.73547 0.27815 1
H7 H 1 0.21486 0.23544 0.22186 1
H8 H 1 0.30621 0.52553 0.09317 1
H9 H 1 0.19378 0.47446 0.59317 1
H10 H 1 0.80623 0.97444 0.90683 1
H11 H 1 0.69376 0.02555 0.40683 1
H12 H 1 0.69378 0.47443 0.90683 1
H13 H 1 0.80623 0.52556 0.40683 1
H14 H 1 0.19378 0.02553 0.09317 1
H15 H 1 0.61146 0.49745 0.28730 1
H16 H 1 0.88853 0.50255 0.78730 1
H17 H 1 0.11145 0.00258 0.71268 1
H18 H 1 0.38855 0.99742 0.21267 1
H19 H 1 0.38855 0.50258 0.71268 1
H20 H 1 0.11144 0.49741 0.21268 1
H21 H 1 0.88853 0.99744 0.28730 1
H22 H 1 0.27569 0.03976 0.84566 1
H23 H 1 0.22431 0.96024 0.34565 1
H24 H 1 0.77566 0.46029 0.15429 1
H25 H 1 0.72433 0.53971 0.65429 1
H26 H 1 0.72433 0.96031 0.15431 1
H27 H 1 0.77566 0.03970 0.65429 1
H28 H 1 0.22431 0.53975 0.84564 1
H29 H 1 0.50141 0.08333 0.94430 1
H30 H 1 0.99858 0.91667 0.44430 1
```

|     |   |   |         |         |         |   |
|-----|---|---|---------|---------|---------|---|
| H31 | H | 1 | 0.00139 | 0.41667 | 0.05564 | 1 |
| H32 | H | 1 | 0.49860 | 0.58324 | 0.55565 | 1 |
| H33 | H | 1 | 0.49863 | 0.91667 | 0.05564 | 1 |
| H34 | H | 1 | 0.00138 | 0.08324 | 0.55564 | 1 |
| H35 | H | 1 | 0.99860 | 0.58333 | 0.94430 | 1 |
| H36 | H | 1 | 0.21123 | 0.34224 | 0.04936 | 1 |
| H37 | H | 1 | 0.28876 | 0.65776 | 0.54936 | 1 |
| H38 | H | 1 | 0.71125 | 0.15770 | 0.95066 | 1 |
| H39 | H | 1 | 0.78874 | 0.84230 | 0.45066 | 1 |
| H40 | H | 1 | 0.78873 | 0.65770 | 0.95066 | 1 |
| H41 | H | 1 | 0.71126 | 0.34229 | 0.45066 | 1 |
| H42 | H | 1 | 0.28875 | 0.84224 | 0.04936 | 1 |
| H43 | H | 1 | 0.21123 | 0.15775 | 0.54936 | 1 |
| H44 | H | 1 | 0.50141 | 0.41667 | 0.44430 | 1 |
| H45 | H | 1 | 0.27569 | 0.46023 | 0.34565 | 1 |
| H46 | H | 1 | 0.61147 | 0.00256 | 0.78730 | 1 |
| H47 | H | 1 | 0.30622 | 0.97446 | 0.59318 | 1 |
| H48 | H | 1 | 0.28513 | 0.76455 | 0.72186 | 1 |
| C1  | C | 1 | 0.35685 | 0.65494 | 0.21663 | 1 |
| C2  | C | 1 | 0.14314 | 0.34505 | 0.71663 | 1 |
| C3  | C | 1 | 0.85686 | 0.84503 | 0.78337 | 1 |
| C4  | C | 1 | 0.64313 | 0.15496 | 0.28337 | 1 |
| C5  | C | 1 | 0.64313 | 0.34504 | 0.78337 | 1 |
| C6  | C | 1 | 0.85686 | 0.65496 | 0.28337 | 1 |
| C7  | C | 1 | 0.14314 | 0.15494 | 0.21663 | 1 |
| C8  | C | 1 | 0.36495 | 0.54763 | 0.15420 | 1 |
| C9  | C | 1 | 0.13504 | 0.45236 | 0.65420 | 1 |
| C10 | C | 1 | 0.86497 | 0.95234 | 0.84579 | 1 |
| C11 | C | 1 | 0.63503 | 0.04766 | 0.34579 | 1 |
| C12 | C | 1 | 0.63503 | 0.45234 | 0.84580 | 1 |
| C13 | C | 1 | 0.86497 | 0.54765 | 0.34579 | 1 |
| C14 | C | 1 | 0.13504 | 0.04763 | 0.15420 | 1 |
| C15 | C | 1 | 0.52412 | 0.53247 | 0.25263 | 1 |
| C16 | C | 1 | 0.97587 | 0.46752 | 0.75264 | 1 |
| C17 | C | 1 | 0.02411 | 0.96753 | 0.74735 | 1 |
| C18 | C | 1 | 0.47588 | 0.03247 | 0.24735 | 1 |
| C19 | C | 1 | 0.47588 | 0.46752 | 0.74734 | 1 |
| C20 | C | 1 | 0.02411 | 0.53247 | 0.24734 | 1 |
| C21 | C | 1 | 0.97587 | 0.03248 | 0.25264 | 1 |
| C22 | C | 1 | 0.29517 | 0.11059 | 0.90230 | 1 |
| C23 | C | 1 | 0.20482 | 0.88940 | 0.40230 | 1 |
| C24 | C | 1 | 0.79515 | 0.38945 | 0.09766 | 1 |
| C25 | C | 1 | 0.70483 | 0.61055 | 0.59766 | 1 |
| C26 | C | 1 | 0.70484 | 0.88945 | 0.09767 | 1 |
| C27 | C | 1 | 0.79516 | 0.11055 | 0.59766 | 1 |
| C28 | C | 1 | 0.20483 | 0.61059 | 0.90229 | 1 |
| C29 | C | 1 | 0.40774 | 0.13125 | 0.95236 | 1 |
| C30 | C | 1 | 0.09226 | 0.86873 | 0.45236 | 1 |
| C31 | C | 1 | 0.90772 | 0.36879 | 0.04760 | 1 |
| C32 | C | 1 | 0.59226 | 0.63120 | 0.54760 | 1 |
| C33 | C | 1 | 0.59229 | 0.86878 | 0.04761 | 1 |
| C34 | C | 1 | 0.90772 | 0.13120 | 0.54760 | 1 |
| C35 | C | 1 | 0.09227 | 0.63127 | 0.95235 | 1 |
| C36 | C | 1 | 0.26027 | 0.26677 | 0.00684 | 1 |
| C37 | C | 1 | 0.23972 | 0.73322 | 0.50684 | 1 |
| C38 | C | 1 | 0.76027 | 0.23320 | 0.99316 | 1 |
| C39 | C | 1 | 0.73972 | 0.76679 | 0.49315 | 1 |
| C40 | C | 1 | 0.73972 | 0.73320 | 0.99316 | 1 |
| C41 | C | 1 | 0.76027 | 0.26679 | 0.49316 | 1 |
| C42 | C | 1 | 0.23973 | 0.76677 | 0.00684 | 1 |
| C43 | C | 1 | 0.26027 | 0.23322 | 0.50684 | 1 |
| C44 | C | 1 | 0.40773 | 0.36873 | 0.45236 | 1 |
| C45 | C | 1 | 0.29516 | 0.38940 | 0.40230 | 1 |
| C46 | C | 1 | 0.52412 | 0.96752 | 0.75264 | 1 |
| C47 | C | 1 | 0.36496 | 0.95236 | 0.65420 | 1 |

C48 C 1 0.35685 0.84505 0.71663 1  
N1 N 1 0.45847 0.64522 0.27887 1  
N2 N 1 0.04153 0.35478 0.77887 1  
N3 N 1 0.95846 0.85477 0.72112 1  
N4 N 1 0.54153 0.14522 0.22112 1  
N5 N 1 0.54154 0.35477 0.72112 1  
N6 N 1 0.95846 0.64522 0.22112 1  
N7 N 1 0.04153 0.14522 0.27887 1  
N8 N 1 0.47108 0.46941 0.17759 1  
N9 N 1 0.02891 0.53057 0.67759 1  
N10 N 1 0.97108 0.03058 0.82240 1  
N11 N 1 0.52892 0.96941 0.32240 1  
N12 N 1 0.52891 0.53057 0.82239 1  
N13 N 1 0.97108 0.46941 0.32240 1  
N14 N 1 0.02891 0.96942 0.17759 1  
N15 N 1 0.20168 0.19721 0.93724 1  
N16 N 1 0.29831 0.80278 0.43723 1  
N17 N 1 0.70169 0.30279 0.06275 1  
N18 N 1 0.79829 0.69721 0.56275 1  
N19 N 1 0.79830 0.80279 0.06276 1  
N20 N 1 0.70169 0.19721 0.56275 1  
N21 N 1 0.29831 0.69720 0.93723 1  
N22 N 1 0.38522 0.23009 0.01940 1  
N23 N 1 0.11477 0.76990 0.51940 1  
N24 N 1 0.88522 0.26991 0.98058 1  
N25 N 1 0.61478 0.73008 0.48058 1  
N26 N 1 0.61478 0.76991 0.98058 1  
N27 N 1 0.88521 0.23008 0.48058 1  
N28 N 1 0.11478 0.73010 0.01940 1  
N29 N 1 0.38522 0.26989 0.51940 1  
N30 N 1 0.20168 0.30278 0.43723 1  
N31 N 1 0.47109 0.03057 0.67760 1  
N32 N 1 0.45846 0.85477 0.77887 1  
Zn1 Zn 1 0.51846 0.28769 0.11644 1  
Zn2 Zn 1 0.98152 0.71230 0.61646 1  
Zn3 Zn 1 0.01844 0.21231 0.88355 1  
Zn4 Zn 1 0.48159 0.78768 0.38358 1  
Zn5 Zn 1 0.48149 0.71229 0.88351 1  
Zn6 Zn 1 0.01844 0.28768 0.38356 1  
Zn7 Zn 1 0.98151 0.78769 0.11646 1  
Zn8 Zn 1 0.51848 0.21231 0.61646 1  
#End of data

```
data_C6 H6 N4 Zn/Pca21 Pna21
_audit_creation_date          2009-12-07
_audit_creation_method        'Igor Baburin'
_chemical_formula_moiety
;
C6 H6 N4 Zn/Pca21 Pna21
;
_chemical_formula_sum          'C6 H6 N4 Zn1'
_citation_special_details
;
File: Pca21.cif.
;
_cell_length_a                 10.1762
_cell_length_b                 7.4976
_cell_length_c                 10.0167
_cell_angle_alpha              90
_cell_angle_beta               90
_cell_angle_gamma              90
_cell_volume                   764.2449
_cell_formula_units_Z          4
_symmetry_space_group_name_H-M 'P 1'
_symmetry_Int_Tables_number    1
_refine_ls_R_factor_all        0
loop_
_symmetry_equiv_pos_site_id
_symmetry_equiv_pos_as_xyz
1 x,y,z
loop_
_atom_site_label
_atom_site_type_symbol
_atom_site_symmetry_multiplicity
_atom_site_fract_x
_atom_site_fract_y
_atom_site_fract_z
_atom_site_occupancy
H1 H 1 0.11928 0.91377 0.58030 1
H2 H 1 0.88072 0.08623 0.08030 1
H3 H 1 0.38072 0.91377 0.08031 1
H4 H 1 0.79793 0.26803 0.57678 1
H5 H 1 0.20207 0.73198 0.07678 1
H6 H 1 0.70206 0.26803 0.07678 1
H7 H 1 0.77811 0.03663 0.35713 1
H8 H 1 0.22189 0.96337 0.85713 1
H9 H 1 0.72189 0.03664 0.85713 1
H10 H 1 0.70945 0.40468 0.89370 1
H11 H 1 0.29055 0.59533 0.39370 1
H12 H 1 0.79055 0.40467 0.39370 1
H13 H 1 0.78139 0.81379 0.61265 1
H14 H 1 0.21861 0.18621 0.11265 1
H15 H 1 0.71861 0.81379 0.11265 1
H16 H 1 0.00556 0.60201 0.63624 1
H17 H 1 0.99444 0.39799 0.13625 1
H18 H 1 0.49444 0.60201 0.13625 1
H19 H 1 0.50556 0.39799 0.63625 1
H20 H 1 0.28139 0.18622 0.61265 1
H21 H 1 0.20945 0.59532 0.89369 1
H22 H 1 0.27811 0.96337 0.35713 1
H23 H 1 0.29794 0.73198 0.57678 1
H24 H 1 0.61928 0.08624 0.58031 1
C1 C 1 0.02862 0.97844 0.54887 1
C2 C 1 0.97138 0.02156 0.04887 1
C3 C 1 0.47138 0.97844 0.04887 1
C4 C 1 0.86164 0.15941 0.54417 1
C5 C 1 0.13836 0.84059 0.04418 1
C6 C 1 0.63836 0.15941 0.04418 1
```



```
C7 C 1 0.85301 0.04591 0.43479 1
C8 C 1 0.14699 0.95409 0.93479 1
C9 C 1 0.64698 0.04591 0.93480 1
C10 C 1 0.76113 0.48789 0.82173 1
C11 C 1 0.23887 0.51212 0.32173 1
C12 C 1 0.73887 0.48789 0.32172 1
C13 C 1 0.79987 0.69843 0.67617 1
C14 C 1 0.20013 0.30157 0.17617 1
C15 C 1 0.70013 0.69844 0.17617 1
C16 C 1 0.91130 0.59296 0.68741 1
C17 C 1 0.08870 0.40704 0.18742 1
C18 C 1 0.58869 0.59296 0.18742 1
C19 C 1 0.41130 0.40703 0.68741 1
C20 C 1 0.29987 0.30157 0.67617 1
C21 C 1 0.26112 0.51213 0.82173 1
C22 C 1 0.35302 0.95409 0.43480 1
C23 C 1 0.36164 0.84059 0.54418 1
C24 C 1 0.52861 0.02156 0.54887 1
N1 N 1 0.97342 0.11639 0.61608 1
N2 N 1 0.02658 0.88361 0.11608 1
N3 N 1 0.52658 0.11639 0.11609 1
N4 N 1 0.95970 0.93074 0.43809 1
N5 N 1 0.04030 0.06926 0.93809 1
N6 N 1 0.54030 0.93074 0.93810 1
N7 N 1 0.70476 0.63142 0.76178 1
N8 N 1 0.29525 0.36857 0.26178 1
N9 N 1 0.79524 0.63142 0.26178 1
N10 N 1 0.88667 0.45894 0.78006 1
N11 N 1 0.11333 0.54107 0.28006 1
N12 N 1 0.61333 0.45893 0.28006 1
N13 N 1 0.38667 0.54106 0.78006 1
N14 N 1 0.20476 0.36858 0.76178 1
N15 N 1 0.45970 0.06926 0.43810 1
N16 N 1 0.47342 0.88361 0.61609 1
Zn1 Zn 1 0.02173 0.25582 0.78943 1
Zn2 Zn 1 0.97827 0.74418 0.28942 1
Zn3 Zn 1 0.47827 0.25582 0.28943 1
Zn4 Zn 1 0.52173 0.74418 0.78943 1
#End of data
```

```
data_C6 H6 N4 Zn/Pc_Cc
_audit_creation_date          2009-12-07
_audit_creation_method       'Igor Baburin'
_chemical_formula_moiety
;
C6 H6 N4 Zn/Pc_Cc
;
_chemical_formula_sum         'C6 H6 N4 Zn1'
_citation_special_details
;
File: dia_Pcfin.cif.
;
_cell_length_a                6.9018
_cell_length_b                7.5408
_cell_length_c                10.1759
_cell_angle_alpha             90
_cell_angle_beta              133.92
_cell_angle_gamma             90
_cell_volume                  381.4798
_cell_formula_units_Z         2
_symmetry_space_group_name_H-M 'P 1'
_symmetry_Int_Tables_number   1
_refine_ls_R_factor_all       0
loop_
_symmetry_equiv_pos_site_id
_symmetry_equiv_pos_as_xyz
1 x,y,z
loop_
_atom_site_label
_atom_site_type_symbol
_atom_site_symmetry_multiplicity
_atom_site_fract_x
_atom_site_fract_y
_atom_site_fract_z
_atom_site_occupancy
H1 H 1 0.20892 0.69577 0.35685 1
H2 H 1 0.23782 0.90602 0.59511 1
H3 H 1 0.17861 0.40279 0.19078 1
H4 H 1 0.67382 0.54630 0.63587 1
H5 H 1 0.09905 0.78535 0.85173 1
H6 H 1 0.80098 0.90614 0.08112 1
H7 H 1 0.80098 0.09386 0.58112 1
H8 H 1 0.09905 0.21466 0.35173 1
H9 H 1 0.67382 0.45370 0.13587 1
H10 H 1 0.17861 0.59722 0.69078 1
H11 H 1 0.23783 0.09399 0.09511 1
H12 H 1 0.20892 0.30424 0.85685 1
C1 C 1 0.10040 0.47346 0.06864 1
C2 C 1 0.84390 0.54942 0.78313 1
C3 C 1 0.05663 0.66784 0.89059 1
C4 C 1 0.64413 0.98649 0.05299 1
C5 C 1 0.35108 0.08578 0.05695 1
C6 C 1 0.33660 0.19006 0.93813 1
C7 C 1 0.33660 0.80995 0.43813 1
C8 C 1 0.35108 0.91423 0.55695 1
C9 C 1 0.64413 0.01351 0.55298 1
C10 C 1 0.05663 0.33217 0.39059 1
C11 C 1 0.84390 0.45059 0.28313 1
C12 C 1 0.10040 0.52654 0.56864 1
N1 N 1 0.87126 0.42617 0.89635 1
N2 N 1 0.21946 0.61920 0.07201 1
N3 N 1 0.52402 0.12714 0.93650 1
N4 N 1 0.54601 0.95679 0.12957 1
N5 N 1 0.54600 0.04322 0.62958 1
N6 N 1 0.52402 0.87286 0.43650 1
```

```
N7 N 1 0.21946 0.38080 0.57201 1  
N8 N 1 0.87126 0.57384 0.39635 1  
Zn1 Zn 1 0.57382 0.75679 0.27989 1  
Zn2 Zn 1 0.57382 0.24321 0.77989 1  
#End of data
```

```
data_C6 H6 N4 Zn/Pnn2 Fdd2
_audit_creation_date          2009-12-07
_audit_creation_method        'Igor Baburin'
_chemical_formula_moiety
;
C6 H6 N4 Zn/Pnn2 Fdd2
;
_chemical_formula_sum          'C6 H6 N4 Zn1'
_citation_special_details
;
File: Pnn2.cif.
;
_cell_length_a                 6.5134
_cell_length_b                 7.8129
_cell_length_c                 7.7192
_cell_angle_alpha              90
_cell_angle_beta               90
_cell_angle_gamma              90
_cell_volume                   392.8189
_cell_formula_units_Z          2
_symmetry_space_group_name_H-M 'P 1'
_symmetry_Int_Tables_number    1
_refine_ls_R_factor_all        0
loop_
_symmetry_equiv_pos_site_id
_symmetry_equiv_pos_as_xyz
1 x,y,z
loop_
_atom_site_label
_atom_site_type_symbol
_atom_site_symmetry_multiplicity
_atom_site_fract_x
_atom_site_fract_y
_atom_site_fract_z
_atom_site_occupancy
H1 H 1 0.22772 0.11489 0.70454 1
H2 H 1 0.77228 0.88512 0.70454 1
H3 H 1 0.27228 0.61489 0.20453 1
H4 H 1 0.31442 0.59339 0.46279 1
H5 H 1 0.68558 0.40661 0.46279 1
H6 H 1 0.18558 0.09339 0.96279 1
H7 H 1 0.12114 0.36856 0.23135 1
H8 H 1 0.87886 0.63144 0.23135 1
H9 H 1 0.37886 0.86856 0.73135 1
H10 H 1 0.62114 0.13144 0.73135 1
H11 H 1 0.81442 0.90661 0.96279 1
H12 H 1 0.72772 0.38511 0.20453 1
C1 C 1 0.22892 0.21478 0.60681 1
C2 C 1 0.77108 0.78522 0.60681 1
C3 C 1 0.27108 0.71477 0.10681 1
C4 C 1 0.27037 0.45984 0.47810 1
C5 C 1 0.72963 0.54016 0.47811 1
C6 C 1 0.22963 0.95984 0.97810 1
C7 C 1 0.17420 0.34903 0.36373 1
C8 C 1 0.82580 0.65097 0.36373 1
C9 C 1 0.32580 0.84903 0.86373 1
C10 C 1 0.67421 0.15097 0.86373 1
C11 C 1 0.77037 0.04016 0.97810 1
C12 C 1 0.72891 0.28523 0.10681 1
N1 N 1 0.30792 0.37429 0.63210 1
N2 N 1 0.69208 0.62570 0.63210 1
N3 N 1 0.19209 0.87429 0.13209 1
N4 N 1 0.14617 0.19326 0.44622 1
N5 N 1 0.85383 0.80675 0.44621 1
N6 N 1 0.35382 0.69326 0.94623 1
```

```
N7 N 1 0.64618 0.30674 0.94623 1  
N8 N 1 0.80791 0.12572 0.13209 1  
Zn1 Zn 1 0.50000 0.50000 0.81581 1  
Zn2 Zn 1 0.00000 0.00000 0.31581 1  
#End of data
```

```
data_dia Aea2-Pnc2
_audit_creation_date          2009-12-07
_audit_creation_method        'Igor Baburin'
_chemical_formula_moiety
;
dia Aea2-Pnc2
;
_chemical_formula_sum          'C6 H6 N4 Zn1'
_citation_special_details
;
File: aba2pnc2.cif.
;
_cell_length_a                 13.1893
_cell_length_b                 10.8884
_cell_length_c                 11.0019
_cell_angle_alpha              90
_cell_angle_beta               90
_cell_angle_gamma              90
_cell_volume                   1579.987
_cell_formula_units_Z          8
_symmetry_space_group_name_H-M 'A b a 2'
_symmetry_Int_Tables_number    41
_refine_ls_R_factor_all        0
loop_
_symmetry_equiv_pos_site_id
_symmetry_equiv_pos_as_xyz
1 x,y,z
2 -x,-y,z
3 1/2-x,1/2+y,z
4 1/2+x,1/2-y,z
5 x,1/2+y,1/2+z
6 -x,1/2-y,1/2+z
7 1/2-x,y,1/2+z
8 1/2+x,-y,1/2+z
loop_
_atom_site_label
_atom_site_type_symbol
_atom_site_symmetry_multiplicity
_atom_site_fract_x
_atom_site_fract_y
_atom_site_fract_z
_atom_site_occupancy
H1 H 8 0.24675 0.39740 0.22131 1
H2 H 8 0.16815 0.03296 0.30743 1
H3 H 8 0.26150 0.03739 0.07925 1
H4 H 4 0.00000 0.50000 0.33136 1
H5 H 8 0.94711 0.61208 0.69256 1
H6 H 4 0.00000 0.00000 0.33352 1
H7 H 8 0.05004 0.11347 0.69451 1
C1 C 8 0.24070 0.29820 0.21409 1
C2 C 8 0.19921 0.10924 0.25556 1
C3 C 8 0.24584 0.11177 0.14276 1
C4 C 4 0.00000 0.50000 0.42988 1
C5 C 8 0.97344 0.55490 0.61762 1
C6 C 4 0.00000 0.00000 0.43216 1
C7 C 8 0.02441 0.05648 0.61917 1
N1 N 8 0.19513 0.22786 0.30073 1
N2 N 8 0.27369 0.23173 0.11680 1
N3 N 8 0.95584 0.58927 0.49836 1
N4 N 8 0.04081 0.09235 0.49986 1
Zn1 Zn 8 0.12697 0.25438 0.46645 1
#End of data
```

```
data_dia C2/c Cc
_audit_creation_date          2009-12-07
_audit_creation_method        'Igor Baburin'
_chemical_formula_moiety
;
dia C2/c Cc
;
_chemical_formula_sum          'C6 H6 N4 Zn1'
_citation_special_details
;
File: C2c.cif.
;
_cell_length_a                 14.3357
_cell_length_b                 14.1537
_cell_length_c                 10.0918
_cell_angle_alpha              90
_cell_angle_beta               131.88
_cell_angle_gamma              90
_cell_volume                   1524.573
_cell_formula_units_Z          8
_symmetry_space_group_name_H-M 'C 2/c'
_symmetry_Int_Tables_number    15
_refine_ls_R_factor_all        0
loop_
_symmetry_equiv_pos_site_id
_symmetry_equiv_pos_as_xyz
1 x,y,z
2 -x,y,1/2-z
3 -x,-y,-z
4 x,-y,1/2+z
5 1/2+x,1/2+y,z
6 1/2-x,1/2+y,1/2-z
7 1/2-x,1/2-y,-z
8 1/2+x,1/2-y,1/2+z
loop_
_atom_site_label
_atom_site_type_symbol
_atom_site_symmetry_multiplicity
_atom_site_fract_x
_atom_site_fract_y
_atom_site_fract_z
_atom_site_occupancy
H1 H 8 0.79364 0.07112 0.92710 1
H2 H 8 0.60051 0.93622 0.05822 1
H3 H 8 0.60983 0.81521 0.84988 1
H4 H 8 0.43427 0.81522 0.29113 1
H5 H 8 0.69058 0.33102 0.28117 1
H6 H 8 0.46550 0.42922 0.06013 1
C1 C 8 0.74082 0.01816 0.93273 1
C2 C 8 0.64248 0.94659 0.00073 1
C3 C 8 0.64668 0.88656 0.89622 1
C4 C 8 0.47383 0.76192 0.39469 1
C5 C 8 0.60456 0.68527 0.64592 1
C6 C 8 0.49236 0.63598 0.53564 1
N1 N 8 0.70313 0.02991 0.02487 1
N2 N 8 0.70813 0.93219 0.85210 1
N3 N 8 0.90936 0.18473 0.37602 1
N4 N 8 0.59282 0.76524 0.55602 1
Zn1 Zn 8 0.72976 0.86748 0.68825 1
#End of data
```

```
data_dia I41acd I4122
_audit_creation_date          2009-12-07
_audit_creation_method        'Igor Baburin'
_chemical_formula_moiety
;
dia I41cd I41
;
_chemical_formula_sum          'C6 H6 N4 Zn1'
_citation_special_details
;
File: I41cd.cif.
;
_cell_length_a                 10.8324
_cell_length_b                 10.8324
_cell_length_c                 13.9715
_cell_angle_alpha              90
_cell_angle_beta               90
_cell_angle_gamma              90
_cell_volume                   1639.428
_cell_formula_units_Z          8
_symmetry_space_group_name_H-M 'I 41 c d'
_symmetry_Int_Tables_number    110
_refine_ls_R_factor_all        0
loop_
_symmetry_equiv_pos_site_id
_symmetry_equiv_pos_as_xyz
1 x,y,z
2 -x,-y,z
3 -y,1/2+x,1/4+z
4 y,1/2-x,1/4+z
5 -x,y,1/2+z
6 x,-y,1/2+z
7 1/2+y,x,1/4+z
8 1/2-y,-x,1/4+z
9 1/2+x,1/2+y,1/2+z
10 1/2-x,1/2-y,1/2+z
11 1/2-y,x,3/4+z
12 1/2+y,-x,3/4+z
13 1/2-x,1/2+y,z
14 1/2+x,1/2-y,z
15 y,1/2+x,3/4+z
16 -y,1/2-x,3/4+z
loop_
_atom_site_label
_atom_site_type_symbol
_atom_site_symmetry_multiplicity
_atom_site_fract_x
_atom_site_fract_y
_atom_site_fract_z
_atom_site_occupancy
H1 H 16 0.27768 0.36452 0.32922 1
H2 H 16 0.77771 0.63486 0.92059 1
H3 H 16 0.75027 0.35561 0.12549 1
C1 C 16 0.25000 0.54447 0.12533 1
C2 C 16 0.35414 0.30679 0.35265 1
C3 C 16 0.85415 0.69276 0.89738 1
N1 N 16 0.47547 0.34247 0.33662 1
N2 N 16 0.97547 0.65735 0.91381 1
Zn1 Zn 8 0.00000 0.00000 0.75026 1
#End of data
```



```
data_dia I41cd Fdd2
_audit_creation_date          2009-12-07
_audit_creation_method        'Igor Baburin'
_chemical_formula_moiety
;
dia I41cd Fdd2
;
_chemical_formula_sum          'C6 H6 N4 Zn1'
_citation_special_details
;
File: i41cdfdd2.cif.
;
_cell_length_a                 9.9276
_cell_length_b                 9.9276
_cell_length_c                 15.2594
_cell_angle_alpha              90
_cell_angle_beta               90
_cell_angle_gamma              90
_cell_volume                   1503.924
_cell_formula_units_Z          8
_symmetry_space_group_name_H-M 'I 41 c d'
_symmetry_Int_Tables_number    110
_refine_ls_R_factor_all        0
loop_
_symmetry_equiv_pos_site_id
_symmetry_equiv_pos_as_xyz
1 x,y,z
2 -x,-y,z
3 -y,1/2+x,1/4+z
4 y,1/2-x,1/4+z
5 -x,y,1/2+z
6 x,-y,1/2+z
7 1/2+y,x,1/4+z
8 1/2-y,-x,1/4+z
9 1/2+x,1/2+y,1/2+z
10 1/2-x,1/2-y,1/2+z
11 1/2-y,x,3/4+z
12 1/2+y,-x,3/4+z
13 1/2-x,1/2+y,z
14 1/2+x,1/2-y,z
15 y,1/2+x,3/4+z
16 -y,1/2-x,3/4+z
loop_
_atom_site_label
_atom_site_type_symbol
_atom_site_symmetry_multiplicity
_atom_site_fract_x
_atom_site_fract_y
_atom_site_fract_z
_atom_site_occupancy
H1 H 16 0.24629 0.69092 0.62840 1
H2 H 16 0.02842 0.68426 0.74287 1
H3 H 16 0.33015 0.41760 0.83438 1
C1 C 16 0.23277 0.63373 0.68870 1
C2 C 16 0.12397 0.63028 0.74565 1
C3 C 16 0.27676 0.49093 0.79402 1
N1 N 16 0.32993 0.54519 0.71982 1
N2 N 16 0.15200 0.53950 0.81240 1
Zn1 Zn 8 0.50000 0.00000 0.40249 1
#End of data
```

```
data_dia I41/acd-I-42d
_audit_creation_date          2009-12-07
_audit_creation_method        'Igor Baburin'
_chemical_formula_moiety
;
dia I41/acd-I-42d
;
_chemical_formula_sum          'C6 H6 N4 Zn1'
_citation_special_details
;
File: i41acd_i42d.cif.
;
_cell_length_a                10.9995
_cell_length_b                10.9995
_cell_length_c                12.616
_cell_angle_alpha             90
_cell_angle_beta              90
_cell_angle_gamma             90
_cell_volume                  1526.397
_cell_formula_units_Z         8
_symmetry_space_group_name_H-M 'I 41/a c d'
_symmetry_Int_Tables_number   142
_refine_ls_R_factor_all       0
loop_
_symmetry_equiv_pos_site_id
_symmetry_equiv_pos_as_xyz
1 x,y,z
2 -x,1/2-y,z
3 x,-y,1/2-z
4 1/2-x,y,-z
5 1/4-y,1/4-x,1/4-z
6 3/4+y,1/4+x,1/4-z
7 1/4+y,1/4-x,3/4+z
8 1/4-y,3/4+x,1/4+z
9 -x,-y,-z
10 x,1/2+y,-z
11 -x,y,1/2+z
12 1/2+x,-y,z
13 1/4+y,1/4+x,1/4+z
14 3/4-y,1/4-x,1/4+z
15 1/4-y,1/4+x,3/4-z
16 1/4+y,3/4-x,1/4-z
17 1/2+x,1/2+y,1/2+z
18 1/2-x,-y,1/2+z
19 1/2+x,1/2-y,-z
20 -x,1/2+y,1/2-z
21 3/4-y,3/4-x,3/4-z
22 1/4+y,3/4+x,3/4-z
23 3/4+y,3/4-x,1/4+z
24 3/4-y,1/4+x,3/4+z
25 1/2-x,1/2-y,1/2-z
26 1/2+x,y,1/2-z
27 1/2-x,1/2+y,z
28 x,1/2-y,1/2+z
29 3/4+y,3/4+x,3/4+z
30 1/4-y,3/4-x,3/4+z
31 3/4-y,3/4+x,1/4-z
32 3/4+y,1/4-x,3/4-z
loop_
_atom_site_label
_atom_site_type_symbol
_atom_site_symmetry_multiplicity
_atom_site_fract_x
_atom_site_fract_y
_atom_site_fract_z
```

```
_atom_site_occupancy  
H1 H 32 0.86475 0.98407 0.04911 1  
H2 H 16 0.75000 0.62307 0.00000 1  
C1 C 32 0.80645 0.90907 0.02462 1  
C2 C 16 0.75000 0.72168 0.00000 1  
N1 N 32 0.84211 0.78982 0.04083 1  
Zn1 Zn 8 0.50000 0.75000 0.87500 1  
#End of data
```

```
data_dia P21212-P212121
_audit_creation_date          2009-12-07
_audit_creation_method        'Igor Baburin'
_chemical_formula_moiety
;
dia P21212-P212121
;
_chemical_formula_sum          'C6 H6 N4 Zn1'
_citation_special_details
;
File: p21212p212121.cif.
;
_cell_length_a                 10.116
_cell_length_b                 10.939
_cell_length_c                 7.1148
_cell_angle_alpha              90
_cell_angle_beta               90
_cell_angle_gamma              90
_cell_volume                   787.3161
_cell_formula_units_Z          4
_symmetry_space_group_name_H-M 'P 21 21 2'
_symmetry_Int_Tables_number    18
_refine_ls_R_factor_all        0
loop_
_symmetry_equiv_pos_site_id
_symmetry_equiv_pos_as_xyz
1 x,y,z
2 -x,-y,z
3 1/2+x,1/2-y,-z
4 1/2-x,1/2+y,-z
loop_
_atom_site_label
_atom_site_type_symbol
_atom_site_symmetry_multiplicity
_atom_site_fract_x
_atom_site_fract_y
_atom_site_fract_z
_atom_site_occupancy
H1 H 4 0.83395 0.93597 0.97157 1
H2 H 4 0.03922 0.90946 0.71103 1
H3 H 4 0.07825 0.64183 0.13532 1
H4 H 4 0.35710 0.99898 0.12436 1
H5 H 4 0.36003 0.77753 0.30990 1
H6 H 4 0.20449 0.04992 0.67132 1
C1 C 4 0.91264 0.86819 0.96343 1
C2 C 4 0.01694 0.85807 0.83808 1
C3 C 4 0.03863 0.71717 0.05182 1
C4 C 4 0.32252 0.97714 0.26535 1
C5 C 4 0.32553 0.86625 0.35915 1
C6 C 4 0.24513 0.00505 0.54747 1
N1 N 4 0.92554 0.77785 0.09801 1
N2 N 4 0.09762 0.76302 0.89465 1
N3 N 4 0.27082 0.06536 0.38451 1
N4 N 4 0.27653 0.88364 0.53925 1
Zn1 Zn 4 0.26481 0.73921 0.72411 1
#End of data
```

```
data_dia P41212 P212121
_audit_creation_date          2009-12-07
_audit_creation_method        'Igor Baburin'
_chemical_formula_moiety
;
dia P41212 P212121
;
_chemical_formula_sum          'C6 H6 N4 Zn1'
_citation_special_details
;
File: P41212.cif.
;
_cell_length_a                 10.6306
_cell_length_b                 10.6306
_cell_length_c                 13.5254
_cell_angle_alpha              90
_cell_angle_beta               90
_cell_angle_gamma              90
_cell_volume                   1528.501
_cell_formula_units_Z          8
_symmetry_space_group_name_H-M 'P 41 21 2'
_symmetry_Int_Tables_number    92
_refine_ls_R_factor_all        0
loop_
_symmetry_equiv_pos_site_id
_symmetry_equiv_pos_as_xyz
1 x,y,z
2 -x,-y,1/2+z
3 1/2+x,1/2-y,3/4-z
4 1/2-x,1/2+y,1/4-z
5 -y,-x,1/2-z
6 y,x,-z
7 1/2+y,1/2-x,3/4+z
8 1/2-y,1/2+x,1/4+z
loop_
_atom_site_label
_atom_site_type_symbol
_atom_site_symmetry_multiplicity
_atom_site_fract_x
_atom_site_fract_y
_atom_site_fract_z
_atom_site_occupancy
H1 H 8 0.21540 0.44927 0.39370 1
H2 H 8 0.00198 0.47194 0.51005 1
H3 H 8 0.97300 0.14472 0.33397 1
H4 H 8 0.49769 0.60938 0.67848 1
H5 H 8 0.52228 0.38298 0.57470 1
H6 H 8 0.88219 0.53842 0.62298 1
C1 C 8 0.13388 0.38768 0.39904 1
C2 C 8 0.02579 0.40003 0.45586 1
C3 C 8 0.00979 0.23081 0.36630 1
C4 C 8 0.58121 0.56117 0.65140 1
C5 C 8 0.59333 0.44940 0.59964 1
C6 C 8 0.78035 0.52691 0.62296 1
N1 N 8 0.12406 0.27956 0.34219 1
N2 N 8 0.94631 0.30017 0.43459 1
N3 N 8 0.70035 0.61000 0.66639 1
N4 N 8 0.71958 0.42763 0.58108 1
Zn1 Zn 8 0.77216 0.27186 0.50212 1
#End of data
```

```
data_dia P41212 P41
_audit_creation_date          2009-12-07
_audit_creation_method        'Igor Baburin'
_chemical_formula_moiety
;
dia P41212 P41
;
_chemical_formula_sum          'C6 H6 N4 Zn1'
_citation_special_details
;
File: p41212p41.cif.
;
_cell_length_a                 10.1602
_cell_length_b                 10.1602
_cell_length_c                 14.9787
_cell_angle_alpha              90
_cell_angle_beta               90
_cell_angle_gamma              90
_cell_volume                   1546.246
_cell_formula_units_Z          8
_symmetry_space_group_name_H-M 'P 41 21 2'
_symmetry_Int_Tables_number    92
_refine_ls_R_factor_all        0
loop_
_symmetry_equiv_pos_site_id
_symmetry_equiv_pos_as_xyz
1 x,y,z
2 -x,-y,1/2+z
3 1/2+x,1/2-y,3/4-z
4 1/2-x,1/2+y,1/4-z
5 -y,-x,1/2-z
6 y,x,-z
7 1/2+y,1/2-x,3/4+z
8 1/2-y,1/2+x,1/4+z
loop_
_atom_site_label
_atom_site_type_symbol
_atom_site_symmetry_multiplicity
_atom_site_fract_x
_atom_site_fract_y
_atom_site_fract_z
_atom_site_occupancy
H1 H 8 0.89088 0.99225 0.18864 1
H2 H 8 0.09912 0.98259 0.06999 1
H3 H 8 0.02314 0.59780 0.16620 1
H4 H 8 0.35510 0.97269 0.71392 1
H5 H 8 0.34028 0.74778 0.81959 1
H6 H 8 0.22014 0.07809 0.97083 1
C1 C 8 0.94875 0.90812 0.16648 1
C2 C 8 0.05286 0.90334 0.10725 1
C3 C 8 0.01582 0.70406 0.15606 1
C4 C 8 0.32344 0.96154 0.78306 1
C5 C 8 0.31564 0.84942 0.83567 1
C6 C 8 0.25065 0.01727 0.91447 1
N1 N 8 0.92525 0.78160 0.19755 1
N2 N 8 0.09578 0.77415 0.10054 1
N3 N 8 0.28109 0.06833 0.83333 1
N4 N 8 0.26893 0.88486 0.91935 1
Zn1 Zn 8 0.25354 0.74337 0.02069 1
#End of data
```

```
data_dia P42 I41
_audit_creation_date          2009-12-07
_audit_creation_method        'Igor Baburin'
_chemical_formula_moiety
;
dia P42 I41
;
_chemical_formula_sum          'C6 H6 N4 Zn1'
_citation_special_details
;
File: p42i41.cif.
;
_cell_length_a                 7.3214
_cell_length_b                 7.3214
_cell_length_c                 7.3889
_cell_angle_alpha              90
_cell_angle_beta               90
_cell_angle_gamma              90
_cell_volume                   396.0665
_cell_formula_units_Z          2
_symmetry_space_group_name_H-M 'P 42'
_symmetry_Int_Tables_number    77
_refine_ls_R_factor_all        0
loop_
_symmetry_equiv_pos_site_id
_symmetry_equiv_pos_as_xyz
1 x,y,z
2 -x,-y,z
3 -y,x,1/2+z
4 y,-x,1/2+z
loop_
_atom_site_label
_atom_site_type_symbol
_atom_site_symmetry_multiplicity
_atom_site_fract_x
_atom_site_fract_y
_atom_site_fract_z
_atom_site_occupancy
H1 H 4 0.22492 0.92125 0.53062 1
H2 H 4 0.38061 0.61271 0.99055 1
H3 H 4 0.16567 0.39762 0.76684 1
C1 C 4 0.23816 0.80679 0.62452 1
C2 C 4 0.31654 0.64577 0.86169 1
C3 C 4 0.20987 0.53846 0.74982 1
N1 N 4 0.33545 0.81632 0.78166 1
N2 N 4 0.15942 0.64041 0.59936 1
Zn1 Zn 2 0.50000 0.00000 0.90761 1
#End of data
```

```
data_dia P42 P41
_audit_creation_date          2009-12-07
_audit_creation_method        'Igor Baburin'
_chemical_formula_moiety
;
dia P42 P41
;
_chemical_formula_sum          'C6 H6 N4 Zn1'
_citation_special_details
;
File: p42p41.cif.
;
_cell_length_a                 10.354
_cell_length_b                 10.354
_cell_length_c                 7.3889
_cell_angle_alpha              90
_cell_angle_beta               90
_cell_angle_gamma              90
_cell_volume                   792.1294
_cell_formula_units_Z          4
_symmetry_space_group_name_H-M 'P 42'
_symmetry_Int_Tables_number    77
_refine_ls_R_factor_all        0
loop_
_symmetry_equiv_pos_site_id
_symmetry_equiv_pos_as_xyz
1 x,y,z
2 -x,-y,z
3 -y,x,1/2+z
4 y,-x,1/2+z
loop_
_atom_site_label
_atom_site_type_symbol
_atom_site_symmetry_multiplicity
_atom_site_fract_x
_atom_site_fract_y
_atom_site_fract_z
_atom_site_occupancy
H1 H 4 0.21570 0.38657 0.26625 1
H2 H 4 0.00122 0.38384 0.49097 1
H3 H 4 0.92610 0.15169 0.03070 1
H4 H 4 0.88407 0.49423 0.99007 1
H5 H 4 0.88115 0.27862 0.76751 1
H6 H 4 0.65200 0.57215 0.53053 1
C1 C 4 0.12365 0.33729 0.24947 1
C2 C 4 0.01693 0.33568 0.36186 1
C3 C 4 0.97627 0.21595 0.12451 1
C4 C 4 0.83505 0.47896 0.86150 1
C5 C 4 0.83391 0.37167 0.75020 1
C6 C 4 0.71538 0.52103 0.62454 1
N1 N 4 0.09833 0.26105 0.09890 1
N2 N 4 0.92277 0.25906 0.28200 1
N3 N 4 0.76014 0.57432 0.78128 1
N4 N 4 0.75776 0.39790 0.59988 1
Zn1 Zn 4 0.74841 0.24846 0.40761 1
#End of data
```



```
data_dia Pbca P212121
_audit_creation_date          2009-12-07
_audit_creation_method        'Igor Baburin'
_chemical_formula_moiety
;
dia Pbca P212121
;
_chemical_formula_sum          'C6 H6 N4 Zn1'
_citation_special_details
;
File: pbcap212121.cif.
;
_cell_length_a                 10.3908
_cell_length_b                 9.8596
_cell_length_c                 14.353
_cell_angle_alpha              90
_cell_angle_beta               90
_cell_angle_gamma              90
_cell_volume                   1470.452
_cell_formula_units_Z          8
_symmetry_space_group_name_H-M 'P b c a'
_symmetry_Int_Tables_number    61
_refine_ls_R_factor_all        0
loop_
_symmetry_equiv_pos_site_id
_symmetry_equiv_pos_as_xyz
1 x,y,z
2 1/2-x,-y,1/2+z
3 1/2+x,1/2-y,-z
4 -x,1/2+y,1/2-z
5 -x,-y,-z
6 1/2+x,y,1/2-z
7 1/2-x,1/2+y,z
8 x,1/2-y,1/2+z
loop_
_atom_site_label
_atom_site_type_symbol
_atom_site_symmetry_multiplicity
_atom_site_fract_x
_atom_site_fract_y
_atom_site_fract_z
_atom_site_occupancy
H1 H 8 0.21486 0.23545 0.27814 1
H2 H 8 0.19378 0.02554 0.40683 1
H3 H 8 0.88854 0.99743 0.21270 1
H4 H 8 0.22432 0.53975 0.65434 1
H5 H 8 0.99860 0.58333 0.55569 1
H6 H 8 0.28876 0.84226 0.45064 1
C1 C 8 0.14314 0.15495 0.28337 1
C2 C 8 0.13504 0.04764 0.34580 1
C3 C 8 0.97588 0.03248 0.24736 1
C4 C 8 0.20484 0.61059 0.59769 1
C5 C 8 0.09227 0.63125 0.54763 1
C6 C 8 0.23973 0.76678 0.49316 1
N1 N 8 0.04154 0.14523 0.22113 1
N2 N 8 0.02891 0.96942 0.32240 1
N3 N 8 0.29831 0.69721 0.56277 1
N4 N 8 0.11478 0.73010 0.48060 1
Zn1 Zn 8 0.98152 0.78769 0.38354 1
#End of data
```

```
data_dia Pca21 Pna21
_audit_creation_date          2009-12-07
_audit_creation_method        'Igor Baburin'
_chemical_formula_moiety
;
dia Pca21 Pna21
;
_chemical_formula_sum          'C6 H6 N4 Zn1'
_citation_special_details
;
File: pca21pna21.cif.
;
_cell_length_a                 10.1762
_cell_length_b                 7.4976
_cell_length_c                 10.0167
_cell_angle_alpha              90
_cell_angle_beta               90
_cell_angle_gamma              90
_cell_volume                   764.2449
_cell_formula_units_Z          4
_symmetry_space_group_name_H-M 'P c a 21'
_symmetry_Int_Tables_number    29
_refine_ls_R_factor_all        0
loop_
_symmetry_equiv_pos_site_id
_symmetry_equiv_pos_as_xyz
1 x,y,z
2 -x,-y,1/2+z
3 1/2-x,y,1/2+z
4 1/2+x,-y,z
loop_
_atom_site_label
_atom_site_type_symbol
_atom_site_symmetry_multiplicity
_atom_site_fract_x
_atom_site_fract_y
_atom_site_fract_z
_atom_site_occupancy
H1 H 4 0.38072 0.58624 0.58031 1
H2 H 4 0.70206 0.23198 0.57678 1
H3 H 4 0.72189 0.46337 0.35713 1
H4 H 4 0.79055 0.09532 0.89369 1
H5 H 4 0.71861 0.68621 0.61265 1
H6 H 4 0.49444 0.89799 0.63625 1
C1 C 4 0.47139 0.52156 0.54887 1
C2 C 4 0.63836 0.34059 0.54418 1
C3 C 4 0.64698 0.45409 0.43480 1
C4 C 4 0.73888 0.01212 0.82173 1
C5 C 4 0.70013 0.80157 0.67617 1
C6 C 4 0.58870 0.90703 0.68741 1
N1 N 4 0.52658 0.38361 0.61609 1
N2 N 4 0.54030 0.56926 0.43810 1
N3 N 4 0.79524 0.86858 0.76178 1
N4 N 4 0.61333 0.04106 0.78006 1
Zn1 Zn 4 0.47827 0.24418 0.78943 1
#End of data
```

```
data_dia Pc Cc
_audit_creation_date          2009-12-07
_audit_creation_method        'Igor Baburin'
_chemical_formula_moiety
;
dia Pc Cc
;
_chemical_formula_sum          'C6 H6 N4 Zn1'
_citation_special_details
;
File: PcCC.cif.
;
_cell_length_a                6.9018
_cell_length_b                7.5408
_cell_length_c                9.961
_cell_angle_alpha             90
_cell_angle_beta              132.62
_cell_angle_gamma             90
_cell_volume                  381.4859
_cell_formula_units_Z         2
_symmetry_space_group_name_H-M 'P c'
_symmetry_Int_Tables_number   7
_refine_ls_R_factor_all       0
loop_
_symmetry_equiv_pos_site_id
_symmetry_equiv_pos_as_xyz
1 x,y,z
2 x,-y,1/2+z
loop_
_atom_site_label
_atom_site_type_symbol
_atom_site_symmetry_multiplicity
_atom_site_fract_x
_atom_site_fract_y
_atom_site_fract_z
_atom_site_occupancy
H1 H 2 0.79705 0.09721 0.80922 1
H2 H 2 0.40208 0.95370 0.36413 1
H3 H 2 0.39559 0.71465 0.14827 1
H4 H 2 0.63874 0.59386 0.91888 1
H5 H 2 0.04761 0.59399 0.40489 1
H6 H 2 0.49522 0.80423 0.64315 1
C1 C 2 0.96312 0.02654 0.93136 1
C2 C 2 0.27764 0.95059 0.21687 1
C3 C 2 0.27545 0.83217 0.10941 1
C4 C 2 0.53816 0.51351 0.94702 1
C5 C 2 0.23718 0.41422 0.94305 1
C6 C 2 0.46034 0.30994 0.06187 1
N1 N 2 0.07856 0.07384 0.10365 1
N2 N 2 0.07544 0.88080 0.92799 1
N3 N 2 0.65102 0.37286 0.06350 1
N4 N 2 0.28685 0.54322 0.87042 1
Zn1 Zn 2 0.01404 0.74321 0.72011 1
#End of data
```

```
data_dia Pnn2 Fdd2
_audit_creation_date          2009-12-07
_audit_creation_method        'Igor Baburin'
_chemical_formula_moiety
;
dia Pnn2 Fdd2
;
_chemical_formula_sum          'C6 H6 N4 Zn1'
_citation_special_details
;
File: pnn2fdd2.cif.
;
_cell_length_a                 6.5134
_cell_length_b                 7.8129
_cell_length_c                 7.7192
_cell_angle_alpha              90
_cell_angle_beta               90
_cell_angle_gamma              90
_cell_volume                   392.8189
_cell_formula_units_Z          2
_symmetry_space_group_name_H-M 'P n n 2'
_symmetry_Int_Tables_number    34
_refine_ls_R_factor_all        0
loop_
_symmetry_equiv_pos_site_id
_symmetry_equiv_pos_as_xyz
1 x,y,z
2 -x,-y,z
3 1/2-x,1/2+y,1/2+z
4 1/2+x,1/2-y,1/2+z
loop_
_atom_site_label
_atom_site_type_symbol
_atom_site_symmetry_multiplicity
_atom_site_fract_x
_atom_site_fract_y
_atom_site_fract_z
_atom_site_occupancy
H1 H 4 0.27228 0.38511 0.70453 1
H2 H 4 0.18558 0.90661 0.46279 1
H3 H 4 0.37886 0.13144 0.23135 1
C1 C 4 0.27109 0.28523 0.60681 1
C2 C 4 0.22963 0.04016 0.47810 1
C3 C 4 0.32579 0.15097 0.36373 1
N1 N 4 0.19209 0.12571 0.63209 1
N2 N 4 0.35382 0.30674 0.44623 1
Zn1 Zn 2 0.00000 0.00000 0.81581 1
#End of data
```

```
data_C6 H6 N4 Zn/C2
_audit_creation_date          2009-12-07
_audit_creation_method        'Igor Baburin'
_chemical_formula_moiety
;
C6 H6 N4 Zn/C2
;
_chemical_formula_sum          'C6 H6 N4 Zn1'
_citation_special_details
;
File: dia_C2
;
_cell_length_a                 18.2479
_cell_length_b                 9.8367
_cell_length_c                 9.8784
_cell_angle_alpha              90
_cell_angle_beta               124.88
_cell_angle_gamma              90
_cell_volume                   1454.618
_cell_formula_units_Z          4
_symmetry_space_group_name_H-M 'P 1'
_symmetry_Int_Tables_number    1
_refine_ls_R_factor_all        0
loop_
_symmetry_equiv_pos_site_id
_symmetry_equiv_pos_as_xyz
1 x,y,z
loop_
_atom_site_label
_atom_site_type_symbol
_atom_site_symmetry_multiplicity
_atom_site_fract_x
_atom_site_fract_y
_atom_site_fract_z
_atom_site_occupancy
H1 H 1 0.65566 0.10646 0.14009 1
H2 H 1 0.77097 0.88393 0.25453 1
H3 H 1 0.74325 0.01679 0.63040 1
H4 H 1 0.94018 0.02233 0.54470 1
H5 H 1 0.00000 0.61582 0.50000 1
H6 H 1 0.06266 0.06084 0.17069 1
H7 H 1 0.00000 0.65472 0.00000 1
H8 H 1 0.93734 0.06084 0.82931 1
H9 H 1 0.05982 0.02234 0.45530 1
H10 H 1 0.25674 0.01679 0.36960 1
H11 H 1 0.22902 0.88392 0.74547 1
H12 H 1 0.34434 0.10646 0.85991 1
H13 H 1 0.84434 0.60646 0.85991 1
H14 H 1 0.72902 0.38392 0.74547 1
H15 H 1 0.75674 0.51679 0.36960 1
H16 H 1 0.55982 0.52234 0.45529 1
H17 H 1 0.43734 0.56083 0.82931 1
H18 H 1 0.50000 0.15472 0.00000 1
H19 H 1 0.56266 0.56083 0.17069 1
H20 H 1 0.50000 0.11582 0.50000 1
H21 H 1 0.44018 0.52234 0.54470 1
H22 H 1 0.24325 0.51679 0.63040 1
H23 H 1 0.27097 0.38392 0.25453 1
H24 H 1 0.15566 0.60646 0.14009 1
C1 C 1 0.68969 0.05372 0.25825 1
C2 C 1 0.74709 0.94327 0.31517 1
C3 C 1 0.73454 0.01044 0.51164 1
C4 C 1 0.97049 0.93750 0.52267 1
C5 C 1 0.00000 0.72682 0.50000 1
C6 C 1 0.03128 0.97588 0.08490 1
```

```
C7 C 1 0.00000 0.76574 0.00000 1
C8 C 1 0.96872 0.97588 0.91509 1
C9 C 1 0.02951 0.93750 0.47734 1
C10 C 1 0.26545 0.01044 0.48836 1
C11 C 1 0.25291 0.94327 0.68483 1
C12 C 1 0.31030 0.05371 0.74175 1
C13 C 1 0.81030 0.55371 0.74175 1
C14 C 1 0.75291 0.44327 0.68483 1
C15 C 1 0.76546 0.51044 0.48837 1
C16 C 1 0.52951 0.43750 0.47733 1
C17 C 1 0.46872 0.47588 0.91509 1
C18 C 1 0.50000 0.26574 0.00000 1
C19 C 1 0.53128 0.47588 0.08490 1
C20 C 1 0.50000 0.22683 0.50000 1
C21 C 1 0.47049 0.43750 0.52267 1
C22 C 1 0.23454 0.51044 0.51163 1
C23 C 1 0.24709 0.44327 0.31517 1
C24 C 1 0.18969 0.55371 0.25825 1
N1 N 1 0.68157 0.09597 0.38331 1
N2 N 1 0.77560 0.91637 0.47620 1
N3 N 1 0.95167 0.80352 0.53687 1
N4 N 1 0.05110 0.84203 0.13829 1
N5 N 1 0.94890 0.84203 0.86171 1
N6 N 1 0.04833 0.80352 0.46313 1
N7 N 1 0.22440 0.91637 0.52380 1
N8 N 1 0.31843 0.09597 0.61669 1
N9 N 1 0.81843 0.59597 0.61669 1
N10 N 1 0.72440 0.41637 0.52380 1
N11 N 1 0.54833 0.30353 0.46313 1
N12 N 1 0.44890 0.34203 0.86171 1
N13 N 1 0.55110 0.34203 0.13829 1
N14 N 1 0.45167 0.30353 0.53687 1
N15 N 1 0.27560 0.41637 0.47620 1
N16 N 1 0.18157 0.59597 0.38331 1
Zn1 Zn 1 0.87352 0.77589 0.62229 1
Zn2 Zn 1 0.12648 0.77589 0.37771 1
Zn3 Zn 1 0.62648 0.27589 0.37771 1
Zn4 Zn 1 0.37352 0.27589 0.62229 1
#End of data
```

```
data_C6 H6 N4 Zn/Cc
_audit_creation_date          2009-12-07
_audit_creation_method        'Igor Baburin'
_chemical_formula_moiety
;
C6 H6 N4 Zn/Cc
;
_chemical_formula_sum          'C6 H6 N4 Zn1'
_citation_special_details
;
File: dia_Cc
;
_cell_length_a                 13.9069
_cell_length_b                 14.0549
_cell_length_c                 10.0678
_cell_angle_alpha              90
_cell_angle_beta               134.86
_cell_angle_gamma              90
_cell_volume                   1394.878
_cell_formula_units_Z          4
_symmetry_space_group_name_H-M 'P 1'
_symmetry_Int_Tables_number    1
_refine_ls_R_factor_all        0
loop_
_symmetry_equiv_pos_site_id
_symmetry_equiv_pos_as_xyz
1 x,y,z
loop_
_atom_site_label
_atom_site_type_symbol
_atom_site_symmetry_multiplicity
_atom_site_fract_x
_atom_site_fract_y
_atom_site_fract_z
_atom_site_occupancy
H1 H 1 0.68048 0.19840 0.54823 1
H2 H 1 0.00818 0.65393 0.19009 1
H3 H 1 0.77551 0.54167 0.94995 1
H4 H 1 0.80238 0.17789 0.32726 1
H5 H 1 0.79885 0.06189 0.09764 1
H6 H 1 0.05273 0.93770 0.63613 1
H7 H 1 0.05273 0.06230 0.13613 1
H8 H 1 0.79885 0.93811 0.59763 1
H9 H 1 0.80238 0.82211 0.82725 1
H10 H 1 0.77551 0.45833 0.44994 1
H11 H 1 0.00818 0.34607 0.69010 1
H12 H 1 0.68048 0.80160 0.04823 1
H13 H 1 0.18048 0.30160 0.04823 1
H14 H 1 0.50818 0.84607 0.69010 1
H15 H 1 0.27551 0.95833 0.44995 1
H16 H 1 0.30238 0.32211 0.82724 1
H17 H 1 0.29885 0.43811 0.59763 1
H18 H 1 0.55273 0.56230 0.13612 1
H19 H 1 0.55273 0.43770 0.63611 1
H20 H 1 0.29885 0.56189 0.09763 1
H21 H 1 0.30238 0.67790 0.32725 1
H22 H 1 0.27551 0.04167 0.94995 1
H23 H 1 0.50818 0.15392 0.19009 1
H24 H 1 0.18048 0.69840 0.54822 1
C1 C 1 0.78987 0.38775 0.50639 1
C2 C 1 0.90572 0.33192 0.62615 1
C3 C 1 0.73826 0.25415 0.55440 1
C4 C 1 0.85336 0.11046 0.35729 1
C5 C 1 0.85177 0.05315 0.24354 1
C6 C 1 0.98381 0.98762 0.52049 1
```

```
C7 C 1 0.98381 0.01238 0.02049 1
C8 C 1 0.85177 0.94685 0.74354 1
C9 C 1 0.85336 0.88954 0.85728 1
C10 C 1 0.73826 0.74586 0.05440 1
C11 C 1 0.90573 0.66808 0.12614 1
C12 C 1 0.78987 0.61225 0.00640 1
C13 C 1 0.28987 0.11225 0.00640 1
C14 C 1 0.40572 0.16807 0.12615 1
C15 C 1 0.23826 0.24586 0.05441 1
C16 C 1 0.35336 0.38954 0.85728 1
C17 C 1 0.35178 0.44685 0.74353 1
C18 C 1 0.48381 0.51238 0.02048 1
C19 C 1 0.48381 0.48762 0.52048 1
C20 C 1 0.35177 0.55315 0.24353 1
C21 C 1 0.35336 0.61046 0.35728 1
C22 C 1 0.23826 0.75414 0.55440 1
C23 C 1 0.40572 0.83192 0.62615 1
C24 C 1 0.28987 0.88775 0.50640 1
N1 N 1 0.87246 0.24714 0.65670 1
N2 N 1 0.18374 0.83802 0.46104 1
N3 N 1 0.93733 0.06847 0.53296 1
N4 N 1 0.93493 0.97520 0.34803 1
N5 N 1 0.93493 0.02480 0.84803 1
N6 N 1 0.93733 0.93154 0.03295 1
N7 N 1 0.18374 0.16198 0.96105 1
N8 N 1 0.87246 0.75286 0.15670 1
N9 N 1 0.37246 0.25286 0.15670 1
N10 N 1 0.68374 0.66198 0.96104 1
N11 N 1 0.43733 0.43154 0.03295 1
N12 N 1 0.43493 0.52480 0.84803 1
N13 N 1 0.43493 0.47520 0.34802 1
N14 N 1 0.43733 0.56846 0.53295 1
N15 N 1 0.68374 0.33802 0.46104 1
N16 N 1 0.37246 0.74714 0.65670 1
Zn1 Zn 1 0.98425 0.12529 0.76052 1
Zn2 Zn 1 0.98425 0.87471 0.26051 1
Zn3 Zn 1 0.48424 0.37471 0.26050 1
Zn4 Zn 1 0.48425 0.62529 0.76051 1
#End of data
```



```
data_C6 H6 N4 Zn/Fdd2
_audit_creation_date          2009-12-07
_audit_creation_method        'Igor Baburin'
_chemical_formula_moiety
;
C6 H6 N4 Zn/Fdd2
;
_chemical_formula_sum          'C6 H6 N4 Zn1'
_citation_special_details
;
File: dia_Fdd2
;
_cell_length_a                 14.0004
_cell_length_b                 14.2968
_cell_length_c                 14.418
_cell_angle_alpha              90
_cell_angle_beta               90
_cell_angle_gamma              90
_cell_volume                   2885.92
_cell_formula_units_Z          8
_symmetry_space_group_name_H-M 'P 1'
_symmetry_Int_Tables_number    1
_refine_ls_R_factor_all        0
loop_
_symmetry_equiv_pos_site_id
_symmetry_equiv_pos_as_xyz
1 x,y,z
loop_
_atom_site_label
_atom_site_type_symbol
_atom_site_symmetry_multiplicity
_atom_site_fract_x
_atom_site_fract_y
_atom_site_fract_z
_atom_site_occupancy
H1 H 1 0.71886 0.53290 0.86929 1
H2 H 1 0.71886 0.03290 0.36929 1
H3 H 1 0.21886 0.53290 0.36929 1
H4 H 1 0.82828 0.65159 0.98002 1
H5 H 1 0.82828 0.15159 0.48002 1
H6 H 1 0.32828 0.65159 0.48002 1
H7 H 1 0.55834 0.61104 0.10586 1
H8 H 1 0.55834 0.11105 0.60585 1
H9 H 1 0.05834 0.61105 0.60585 1
H10 H 1 0.44166 0.38896 0.10586 1
H11 H 1 0.44166 0.88896 0.60586 1
H12 H 1 0.94166 0.38896 0.60585 1
H13 H 1 0.69169 0.86104 0.35585 1
H14 H 1 0.69169 0.36104 0.85585 1
H15 H 1 0.19169 0.86104 0.85585 1
H16 H 1 0.80831 0.63896 0.35585 1
H17 H 1 0.80831 0.13896 0.85585 1
H18 H 1 0.30831 0.63896 0.85585 1
H19 H 1 0.17172 0.34841 0.98002 1
H20 H 1 0.17173 0.84841 0.48002 1
H21 H 1 0.67172 0.34841 0.48002 1
H22 H 1 0.42173 0.90159 0.23007 1
H23 H 1 0.42173 0.40159 0.73007 1
H24 H 1 0.92173 0.90159 0.73007 1
H25 H 1 0.07827 0.59841 0.23007 1
H26 H 1 0.07827 0.09841 0.73007 1
H27 H 1 0.57827 0.59841 0.73007 1
H28 H 1 0.28114 0.46710 0.86929 1
H29 H 1 0.28114 0.96710 0.36929 1
H30 H 1 0.78114 0.46710 0.36929 1
```

|     |   |   |         |         |         |   |
|-----|---|---|---------|---------|---------|---|
| H31 | H | 1 | 0.53113 | 0.78293 | 0.11930 | 1 |
| H32 | H | 1 | 0.53113 | 0.28293 | 0.61930 | 1 |
| H33 | H | 1 | 0.03113 | 0.78293 | 0.61930 | 1 |
| H34 | H | 1 | 0.96887 | 0.71707 | 0.11930 | 1 |
| H35 | H | 1 | 0.96887 | 0.21707 | 0.61930 | 1 |
| H36 | H | 1 | 0.46887 | 0.71707 | 0.61930 | 1 |
| H37 | H | 1 | 0.46887 | 0.21707 | 0.11930 | 1 |
| H38 | H | 1 | 0.03113 | 0.28293 | 0.11930 | 1 |
| H39 | H | 1 | 0.78114 | 0.96710 | 0.86929 | 1 |
| H40 | H | 1 | 0.57827 | 0.09841 | 0.23007 | 1 |
| H41 | H | 1 | 0.92173 | 0.40159 | 0.23007 | 1 |
| H42 | H | 1 | 0.67172 | 0.84841 | 0.98002 | 1 |
| H43 | H | 1 | 0.30831 | 0.13896 | 0.35585 | 1 |
| H44 | H | 1 | 0.19169 | 0.36104 | 0.35585 | 1 |
| H45 | H | 1 | 0.94166 | 0.88896 | 0.10586 | 1 |
| H46 | H | 1 | 0.05834 | 0.11104 | 0.10586 | 1 |
| H47 | H | 1 | 0.32827 | 0.15159 | 0.98002 | 1 |
| H48 | H | 1 | 0.21886 | 0.03290 | 0.86929 | 1 |
| C1  | C | 1 | 0.70167 | 0.56610 | 0.93531 | 1 |
| C2  | C | 1 | 0.70168 | 0.06610 | 0.43531 | 1 |
| C3  | C | 1 | 0.20168 | 0.56610 | 0.43531 | 1 |
| C4  | C | 1 | 0.75599 | 0.62517 | 0.99031 | 1 |
| C5  | C | 1 | 0.75599 | 0.12517 | 0.49031 | 1 |
| C6  | C | 1 | 0.25598 | 0.62517 | 0.49031 | 1 |
| C7  | C | 1 | 0.61715 | 0.60595 | 0.05635 | 1 |
| C8  | C | 1 | 0.61715 | 0.10595 | 0.55634 | 1 |
| C9  | C | 1 | 0.11715 | 0.60595 | 0.55634 | 1 |
| C10 | C | 1 | 0.38285 | 0.39405 | 0.05635 | 1 |
| C11 | C | 1 | 0.38285 | 0.89405 | 0.55635 | 1 |
| C12 | C | 1 | 0.88286 | 0.39405 | 0.55635 | 1 |
| C13 | C | 1 | 0.63288 | 0.85595 | 0.30635 | 1 |
| C14 | C | 1 | 0.63287 | 0.35595 | 0.80635 | 1 |
| C15 | C | 1 | 0.13287 | 0.85595 | 0.80635 | 1 |
| C16 | C | 1 | 0.86713 | 0.64405 | 0.30635 | 1 |
| C17 | C | 1 | 0.86713 | 0.14405 | 0.80635 | 1 |
| C18 | C | 1 | 0.36713 | 0.64405 | 0.80635 | 1 |
| C19 | C | 1 | 0.24401 | 0.37483 | 0.99031 | 1 |
| C20 | C | 1 | 0.24402 | 0.87483 | 0.49031 | 1 |
| C21 | C | 1 | 0.74402 | 0.37483 | 0.49031 | 1 |
| C22 | C | 1 | 0.49402 | 0.87518 | 0.24034 | 1 |
| C23 | C | 1 | 0.49402 | 0.37518 | 0.74034 | 1 |
| C24 | C | 1 | 0.99402 | 0.87518 | 0.74034 | 1 |
| C25 | C | 1 | 0.00598 | 0.62482 | 0.24034 | 1 |
| C26 | C | 1 | 0.00598 | 0.12482 | 0.74034 | 1 |
| C27 | C | 1 | 0.50598 | 0.62482 | 0.74034 | 1 |
| C28 | C | 1 | 0.29833 | 0.43390 | 0.93531 | 1 |
| C29 | C | 1 | 0.29833 | 0.93390 | 0.43531 | 1 |
| C30 | C | 1 | 0.79833 | 0.43390 | 0.43531 | 1 |
| C31 | C | 1 | 0.54833 | 0.81611 | 0.18532 | 1 |
| C32 | C | 1 | 0.54832 | 0.31611 | 0.68532 | 1 |
| C33 | C | 1 | 0.04832 | 0.81611 | 0.68532 | 1 |
| C34 | C | 1 | 0.95168 | 0.68389 | 0.18532 | 1 |
| C35 | C | 1 | 0.95168 | 0.18389 | 0.68532 | 1 |
| C36 | C | 1 | 0.45167 | 0.68389 | 0.68532 | 1 |
| C37 | C | 1 | 0.45167 | 0.18389 | 0.18532 | 1 |
| C38 | C | 1 | 0.04832 | 0.31611 | 0.18532 | 1 |
| C39 | C | 1 | 0.79833 | 0.93390 | 0.93531 | 1 |
| C40 | C | 1 | 0.50598 | 0.12482 | 0.24034 | 1 |
| C41 | C | 1 | 0.99402 | 0.37518 | 0.24034 | 1 |
| C42 | C | 1 | 0.74401 | 0.87483 | 0.99031 | 1 |
| C43 | C | 1 | 0.36713 | 0.14405 | 0.30635 | 1 |
| C44 | C | 1 | 0.13287 | 0.35595 | 0.30635 | 1 |
| C45 | C | 1 | 0.88285 | 0.89405 | 0.05635 | 1 |
| C46 | C | 1 | 0.11715 | 0.10595 | 0.05635 | 1 |
| C47 | C | 1 | 0.25598 | 0.12517 | 0.99031 | 1 |

```
C48 C 1 0.20167 0.06610 0.93531 1
N1 N 1 0.61341 0.55381 0.97762 1
N2 N 1 0.61341 0.05381 0.47762 1
N3 N 1 0.11341 0.55381 0.47762 1
N4 N 1 0.70205 0.65037 0.06703 1
N5 N 1 0.70205 0.15037 0.56703 1
N6 N 1 0.20206 0.65038 0.56703 1
N7 N 1 0.29794 0.34963 0.06703 1
N8 N 1 0.29794 0.84963 0.56703 1
N9 N 1 0.79795 0.34963 0.56703 1
N10 N 1 0.54797 0.90037 0.31705 1
N11 N 1 0.54797 0.40037 0.81705 1
N12 N 1 0.04797 0.90037 0.81705 1
N13 N 1 0.95204 0.59963 0.31705 1
N14 N 1 0.95203 0.09963 0.81705 1
N15 N 1 0.45203 0.59963 0.81705 1
N16 N 1 0.38659 0.44619 0.97762 1
N17 N 1 0.38660 0.94619 0.47762 1
N18 N 1 0.88660 0.44619 0.47762 1
N19 N 1 0.63660 0.80382 0.22762 1
N20 N 1 0.63660 0.30382 0.72762 1
N21 N 1 0.13660 0.80382 0.72762 1
N22 N 1 0.86340 0.69618 0.22762 1
N23 N 1 0.86340 0.19618 0.72762 1
N24 N 1 0.36340 0.69617 0.72762 1
N25 N 1 0.36340 0.19617 0.22762 1
N26 N 1 0.13660 0.30382 0.22762 1
N27 N 1 0.88659 0.94619 0.97762 1
N28 N 1 0.45204 0.09963 0.31705 1
N29 N 1 0.04797 0.40037 0.31705 1
N30 N 1 0.79795 0.84963 0.06703 1
N31 N 1 0.20205 0.15037 0.06703 1
N32 N 1 0.11341 0.05381 0.97762 1
Zn1 Zn 1 0.25000 0.75000 0.65935 1
Zn2 Zn 1 0.75000 0.25000 0.65935 1
Zn3 Zn 1 0.00000 0.00000 0.90937 1
Zn4 Zn 1 0.50000 0.50000 0.90937 1
Zn5 Zn 1 0.50000 0.00000 0.40937 1
Zn6 Zn 1 0.00000 0.50000 0.40937 1
Zn7 Zn 1 0.75000 0.75000 0.15935 1
Zn8 Zn 1 0.25000 0.25000 0.15935 1
#End of data
```

```
data_C6 H6 N4 Zn/I4122
_audit_creation_date          2009-12-07
_audit_creation_method        'Igor Baburin'
_chemical_formula_moiety
;
C6 H6 N4 Zn/I4122
;
_chemical_formula_sum          'C6 H6 N4 Zn1'
_citation_special_details
;
File: dia_I4122
;
_cell_length_a                 9.3279
_cell_length_b                 9.3279
_cell_length_c                 16.96
_cell_angle_alpha              90
_cell_angle_beta               90
_cell_angle_gamma              90
_cell_volume                   1475.685
_cell_formula_units_Z          4
_symmetry_space_group_name_H-M 'P 1'
_symmetry_Int_Tables_number    1
_refine_ls_R_factor_all        0
loop_
_symmetry_equiv_pos_site_id
_symmetry_equiv_pos_as_xyz
1 x,y,z
loop_
_atom_site_label
_atom_site_type_symbol
_atom_site_symmetry_multiplicity
_atom_site_fract_x
_atom_site_fract_y
_atom_site_fract_z
_atom_site_occupancy
H1 H 1 0.26560 0.85113 0.56432 1
H2 H 1 0.73390 0.14892 0.56435 1
H3 H 1 0.26557 0.64943 0.68547 1
H4 H 1 0.73398 0.35052 0.68552 1
H5 H 1 0.14914 0.73420 0.43552 1
H6 H 1 0.85038 0.26570 0.43555 1
H7 H 1 0.85091 0.23412 0.81436 1
H8 H 1 0.14884 0.76589 0.81438 1
H9 H 1 0.16245 0.25016 0.62461 1
H10 H 1 0.83706 0.74983 0.62465 1
H11 H 1 0.33707 0.24973 0.12464 1
H12 H 1 0.66248 0.75000 0.12468 1
H13 H 1 0.74987 0.83728 0.37469 1
H14 H 1 0.24959 0.16263 0.37463 1
H15 H 1 0.74956 0.66260 0.87470 1
H16 H 1 0.64873 0.26584 0.31437 1
H17 H 1 0.35077 0.73406 0.31437 1
H18 H 1 0.35055 0.76566 0.93552 1
H19 H 1 0.64926 0.23412 0.93553 1
H20 H 1 0.23397 0.85041 0.18550 1
H21 H 1 0.76556 0.14935 0.18548 1
H22 H 1 0.23392 0.64884 0.06432 1
H23 H 1 0.76562 0.35101 0.06432 1
H24 H 1 0.24980 0.33727 0.87463 1
C1 C 1 0.17617 0.80042 0.59486 1
C2 C 1 0.95408 0.75000 0.62470 1
C3 C 1 0.04544 0.25000 0.62468 1
C4 C 1 0.82335 0.19960 0.59487 1
C5 C 1 0.17615 0.69995 0.65483 1
C6 C 1 0.82339 0.30005 0.65485 1
```

```
C7 C 1 0.19966 0.82357 0.40486 1
C8 C 1 0.79984 0.17632 0.40489 1
C9 C 1 0.80021 0.32355 0.84490 1
C10 C 1 0.19947 0.67641 0.84490 1
C11 C 1 0.69939 0.17637 0.34489 1
C12 C 1 0.30012 0.82351 0.34489 1
C13 C 1 0.29995 0.67630 0.90487 1
C14 C 1 0.69975 0.32355 0.90489 1
C15 C 1 0.32339 0.79994 0.15485 1
C16 C 1 0.67615 0.19987 0.15484 1
C17 C 1 0.32336 0.69950 0.09486 1
C18 C 1 0.74978 0.95427 0.37473 1
C19 C 1 0.24972 0.04562 0.37472 1
C20 C 1 0.24980 0.45427 0.87471 1
C21 C 1 0.74973 0.54561 0.87477 1
C22 C 1 0.54546 0.75000 0.12472 1
C23 C 1 0.45409 0.24986 0.12471 1
C24 C 1 0.67619 0.30032 0.09486 1
N1 N 1 0.03483 0.83153 0.57538 1
N2 N 1 0.96467 0.16849 0.57537 1
N3 N 1 0.03482 0.66855 0.67413 1
N4 N 1 0.96473 0.33144 0.67413 1
N5 N 1 0.16830 0.96491 0.42415 1
N6 N 1 0.83118 0.03497 0.42417 1
N7 N 1 0.83131 0.46489 0.82543 1
N8 N 1 0.16827 0.53510 0.82540 1
N9 N 1 0.66824 0.03504 0.32540 1
N10 N 1 0.33127 0.96482 0.32540 1
N11 N 1 0.33127 0.53492 0.92415 1
N12 N 1 0.66835 0.46489 0.92420 1
N13 N 1 0.46473 0.83132 0.17415 1
N14 N 1 0.53482 0.16848 0.17414 1
N15 N 1 0.46469 0.66838 0.07539 1
N16 N 1 0.53487 0.33141 0.07538 1
Zn1 Zn 1 0.99976 0.00000 0.49974 1
Zn2 Zn 1 0.99980 0.50000 0.74974 1
Zn3 Zn 1 0.49978 0.49988 0.99976 1
Zn4 Zn 1 0.49979 0.00000 0.24976 1
#End of data
```

```
data_C6 H6 N4 Zn/I41
_audit_creation_date          2009-12-07
_audit_creation_method        'Igor Baburin'
_chemical_formula_moiety
;
C6 H6 N4 Zn/I41
;
_chemical_formula_sum          'C6 H6 N4 Zn1'
_citation_special_details
;
File: dia_I41
;
_cell_length_a                 10.0942
_cell_length_b                 10.0942
_cell_length_c                 15.2564
_cell_angle_alpha              90
_cell_angle_beta               90
_cell_angle_gamma              90
_cell_volume                   1554.518
_cell_formula_units_Z          4
_symmetry_space_group_name_H-M 'P 1'
_symmetry_Int_Tables_number    1
_refine_ls_R_factor_all        0
loop_
_symmetry_equiv_pos_site_id
_symmetry_equiv_pos_as_xyz
1 x,y,z
loop_
_atom_site_label
_atom_site_type_symbol
_atom_site_symmetry_multiplicity
_atom_site_fract_x
_atom_site_fract_y
_atom_site_fract_z
_atom_site_occupancy
H1 H 1 0.17229 0.25084 0.74532 1
H2 H 1 0.65912 0.52986 0.13643 1
H3 H 1 0.67686 0.39560 0.79215 1
H4 H 1 0.32291 0.60446 0.79222 1
H5 H 1 0.60470 0.17715 0.04221 1
H6 H 1 0.39536 0.82295 0.04222 1
H7 H 1 0.34067 0.47001 0.13639 1
H8 H 1 0.47017 0.15944 0.38635 1
H9 H 1 0.53003 0.84067 0.38631 1
H10 H 1 0.82768 0.74921 0.74526 1
H11 H 1 0.74919 0.67254 0.99527 1
H12 H 1 0.25074 0.32749 0.99527 1
H13 H 1 0.75088 0.82747 0.49527 1
H14 H 1 0.24932 0.17251 0.49528 1
H15 H 1 0.32778 0.24915 0.24531 1
H16 H 1 0.02988 0.34056 0.88634 1
H17 H 1 0.97003 0.65932 0.88632 1
H18 H 1 0.84097 0.97014 0.63642 1
H19 H 1 0.89536 0.32285 0.54220 1
H20 H 1 0.10471 0.67705 0.54221 1
H21 H 1 0.82324 0.10440 0.29217 1
H22 H 1 0.17715 0.89555 0.29222 1
H23 H 1 0.15939 0.02999 0.63639 1
H24 H 1 0.67236 0.75081 0.24527 1
C1 C 1 0.27287 0.53056 0.83263 1
C2 C 1 0.11293 0.23346 0.68682 1
C3 C 1 0.60673 0.62406 0.13244 1
C4 C 1 0.39316 0.37587 0.13240 1
C5 C 1 0.37603 0.10694 0.38239 1
C6 C 1 0.62426 0.89305 0.38235 1
```

```
C7 C 1 0.88718 0.76659 0.68682 1
C8 C 1 0.76647 0.61309 0.93678 1
C9 C 1 0.23336 0.38694 0.93681 1
C10 C 1 0.72694 0.46947 0.83260 1
C11 C 1 0.46927 0.77293 0.08264 1
C12 C 1 0.53078 0.22715 0.08264 1
C13 C 1 0.03079 0.72707 0.58263 1
C14 C 1 0.96928 0.27286 0.58264 1
C15 C 1 0.22721 0.96946 0.33263 1
C16 C 1 0.73358 0.88690 0.43678 1
C17 C 1 0.26671 0.11307 0.43681 1
C18 C 1 0.38714 0.26652 0.18682 1
C19 C 1 0.12403 0.39306 0.88239 1
C20 C 1 0.87580 0.60695 0.88235 1
C21 C 1 0.89333 0.87593 0.63244 1
C22 C 1 0.10690 0.12413 0.63240 1
C23 C 1 0.61289 0.73341 0.18683 1
C24 C 1 0.77313 0.03054 0.33260 1
N1 N 1 0.02484 0.32798 0.65537 1
N2 N 1 0.51573 0.64925 0.06612 1
N3 N 1 0.48420 0.35074 0.06609 1
N4 N 1 0.35086 0.01593 0.31607 1
N5 N 1 0.64948 0.98408 0.31605 1
N6 N 1 0.97517 0.67198 0.65535 1
N7 N 1 0.67187 0.52507 0.90533 1
N8 N 1 0.32795 0.47497 0.90536 1
N9 N 1 0.82819 0.97493 0.40533 1
N10 N 1 0.17212 0.02505 0.40536 1
N11 N 1 0.47524 0.17201 0.15537 1
N12 N 1 0.14920 0.48408 0.81607 1
N13 N 1 0.85058 0.51591 0.81605 1
N14 N 1 0.98433 0.85074 0.56612 1
N15 N 1 0.01586 0.14926 0.56610 1
N16 N 1 0.52489 0.82801 0.15536 1
Zn1 Zn 1 0.50020 0.00000 0.22212 1
Zn2 Zn 1 0.00000 0.00000 0.47213 1
Zn3 Zn 1 0.50000 0.50000 0.97213 1
Zn4 Zn 1 0.99989 0.50000 0.72211 1
#End of data
```

```
data_C6 H6 N4 Zn/I-42d
_audit_creation_date          2009-12-07
_audit_creation_method        'Igor Baburin'
_chemical_formula_moiety
;
C6 H6 N4 Zn/I-42d
;
_chemical_formula_sum          'C6 H6 N4 Zn1'
_citation_special_details
;
File: dia_I42d
;
_cell_length_a                 9.8488
_cell_length_b                 9.8488
_cell_length_c                 14.4373
_cell_angle_alpha              90
_cell_angle_beta               90
_cell_angle_gamma              90
_cell_volume                   1400.402
_cell_formula_units_Z          4
_symmetry_space_group_name_H-M 'P 1'
_symmetry_Int_Tables_number    1
_refine_ls_R_factor_all        0
loop_
_symmetry_equiv_pos_site_id
_symmetry_equiv_pos_as_xyz
1 x,y,z
loop_
_atom_site_label
_atom_site_type_symbol
_atom_site_symmetry_multiplicity
_atom_site_fract_x
_atom_site_fract_y
_atom_site_fract_z
_atom_site_occupancy
H1 H 1 0.36308 0.71383 0.31649 1
H2 H 1 0.11896 0.75000 0.62481 1
H3 H 1 0.87972 0.25000 0.62455 1
H4 H 1 0.63599 0.28568 0.31647 1
H5 H 1 0.36345 0.78566 0.93234 1
H6 H 1 0.63601 0.21369 0.93249 1
H7 H 1 0.71337 0.86365 0.56657 1
H8 H 1 0.28540 0.13639 0.56658 1
H9 H 1 0.28529 0.36386 0.68246 1
H10 H 1 0.71326 0.63636 0.68260 1
H11 H 1 0.21339 0.13627 0.18245 1
H12 H 1 0.78528 0.86345 0.18226 1
H13 H 1 0.78533 0.63601 0.06638 1
H14 H 1 0.21346 0.36331 0.06622 1
H15 H 1 0.13601 0.71379 0.43269 1
H16 H 1 0.86330 0.28561 0.43244 1
H17 H 1 0.13606 0.78592 0.81641 1
H18 H 1 0.37967 0.74952 0.12438 1
H19 H 1 0.61907 0.24952 0.12410 1
H20 H 1 0.24948 0.11946 0.37459 1
H21 H 1 0.74951 0.88000 0.37455 1
H22 H 1 0.24920 0.38015 0.87449 1
H23 H 1 0.74920 0.61941 0.87434 1
H24 H 1 0.86343 0.21385 0.81657 1
C1 C 1 0.30577 0.79841 0.34563 1
C2 C 1 0.00807 0.75000 0.62471 1
C3 C 1 0.99061 0.25000 0.62449 1
C4 C 1 0.69333 0.20104 0.34552 1
C5 C 1 0.30597 0.70116 0.90324 1
C6 C 1 0.69327 0.29832 0.90336 1
```



```
C7 C 1 0.79795 0.80629 0.59568 1
C8 C 1 0.20079 0.19379 0.59561 1
C9 C 1 0.20075 0.30647 0.65334 1
C10 C 1 0.79786 0.69368 0.65349 1
C11 C 1 0.29802 0.19346 0.15326 1
C12 C 1 0.70071 0.80604 0.15319 1
C13 C 1 0.70073 0.69337 0.09544 1
C14 C 1 0.29801 0.30595 0.09535 1
C15 C 1 0.19328 0.79840 0.40354 1
C16 C 1 0.80595 0.20104 0.40332 1
C17 C 1 0.19332 0.70125 0.84547 1
C18 C 1 0.49056 0.74963 0.12436 1
C19 C 1 0.50819 0.24960 0.12417 1
C20 C 1 0.24951 0.00857 0.37458 1
C21 C 1 0.74960 0.99089 0.37447 1
C22 C 1 0.24940 0.49104 0.87443 1
C23 C 1 0.74933 0.50852 0.87437 1
C24 C 1 0.80593 0.29840 0.84559 1
N1 N 1 0.34089 0.93217 0.32730 1
N2 N 1 0.65814 0.06728 0.32725 1
N3 N 1 0.34097 0.56737 0.92155 1
N4 N 1 0.65794 0.43207 0.92155 1
N5 N 1 0.93174 0.84141 0.57748 1
N6 N 1 0.06704 0.15857 0.57736 1
N7 N 1 0.06698 0.34160 0.67161 1
N8 N 1 0.93159 0.65851 0.67184 1
N9 N 1 0.43179 0.15826 0.17149 1
N10 N 1 0.56694 0.84117 0.17149 1
N11 N 1 0.56697 0.65815 0.07721 1
N12 N 1 0.43176 0.34100 0.07695 1
N13 N 1 0.15814 0.93216 0.42186 1
N14 N 1 0.84108 0.06729 0.42164 1
N15 N 1 0.15799 0.56752 0.82725 1
N16 N 1 0.84092 0.43219 0.82726 1
Zn1 Zn 1 0.99962 0.99988 0.49972 1
Zn2 Zn 1 0.99933 0.50000 0.74951 1
Zn3 Zn 1 0.49946 0.99975 0.24937 1
Zn4 Zn 1 0.49942 0.49966 0.99933 1
#End of data
```

```
data_C6 H6 N4 Zn/Ima2
_audit_creation_date          2009-12-07
_audit_creation_method        'Igor Baburin'
_chemical_formula_moiety
;
C6 H6 N4 Zn/Ima2
;
_chemical_formula_sum          'C6 H6 N4 Zn1'
_citation_special_details
;
File: dia_Ima2
;
_cell_length_a                 10.4847
_cell_length_b                 14.9471
_cell_length_c                 10.5487
_cell_angle_alpha              90
_cell_angle_beta               90
_cell_angle_gamma              90
_cell_volume                   1653.149
_cell_formula_units_Z          4
_symmetry_space_group_name_H-M 'P 1'
_symmetry_Int_Tables_number    1
_refine_ls_R_factor_all        0
loop_
_symmetry_equiv_pos_site_id
_symmetry_equiv_pos_as_xyz
1 x,y,z
loop_
_atom_site_label
_atom_site_type_symbol
_atom_site_symmetry_multiplicity
_atom_site_fract_x
_atom_site_fract_y
_atom_site_fract_z
_atom_site_occupancy
H1 H 1 0.59139 0.06431 0.49058 1
H2 H 1 0.50000 0.00000 0.87019 1
H3 H 1 0.75000 0.33253 0.69728 1
H4 H 1 0.75000 0.44026 0.90619 1
H5 H 1 0.75000 0.16899 0.02238 1
H6 H 1 0.25000 0.83100 0.02238 1
H7 H 1 0.25000 0.55973 0.90617 1
H8 H 1 0.25000 0.66748 0.69729 1
H9 H 1 0.00000 0.00000 0.87020 1
H10 H 1 0.40859 0.93571 0.49058 1
H11 H 1 0.90861 0.06430 0.49058 1
H12 H 1 0.09142 0.93570 0.49058 1
H13 H 1 0.59140 0.43569 0.99058 1
H14 H 1 0.40859 0.56429 0.99058 1
H15 H 1 0.90860 0.43569 0.99058 1
H16 H 1 0.50000 0.50000 0.37019 1
H17 H 1 0.75000 0.16747 0.19728 1
H18 H 1 0.75000 0.05973 0.40617 1
H19 H 1 0.75000 0.33100 0.52236 1
H20 H 1 0.25000 0.66899 0.52239 1
H21 H 1 0.25000 0.94024 0.40620 1
H22 H 1 0.25000 0.83252 0.19729 1
H23 H 1 0.00000 0.50000 0.37020 1
H24 H 1 0.09140 0.56429 0.99058 1
C1 C 1 0.54862 0.03075 0.57086 1
C2 C 1 0.50000 0.00000 0.76674 1
C3 C 1 0.75000 0.31369 0.79664 1
C4 C 1 0.75000 0.36751 0.90283 1
C5 C 1 0.75000 0.22932 0.96443 1
C6 C 1 0.25000 0.77066 0.96445 1
```

```
C7 C 1 0.25000 0.63248 0.90284 1
C8 C 1 0.25000 0.68631 0.79665 1
C9 C 1 0.00000 0.00000 0.76674 1
C10 C 1 0.45137 0.96925 0.57086 1
C11 C 1 0.95139 0.03075 0.57086 1
C12 C 1 0.04864 0.96925 0.57086 1
C13 C 1 0.54861 0.46924 0.07086 1
C14 C 1 0.45136 0.53074 0.07086 1
C15 C 1 0.95138 0.46923 0.07086 1
C16 C 1 0.50000 0.50000 0.26674 1
C17 C 1 0.75000 0.18630 0.29664 1
C18 C 1 0.75000 0.13247 0.40283 1
C19 C 1 0.75000 0.27066 0.46444 1
C20 C 1 0.25000 0.72932 0.46445 1
C21 C 1 0.25000 0.86751 0.40284 1
C22 C 1 0.25000 0.81368 0.29664 1
C23 C 1 0.00000 0.50000 0.26674 1
C24 C 1 0.04863 0.53073 0.07086 1
N1 N 1 0.58199 0.05001 0.69500 1
N2 N 1 0.75000 0.22537 0.83548 1
N3 N 1 0.75000 0.31418 0.01137 1
N4 N 1 0.25000 0.68581 0.01139 1
N5 N 1 0.25000 0.77463 0.83549 1
N6 N 1 0.41801 0.94999 0.69500 1
N7 N 1 0.91802 0.05000 0.69501 1
N8 N 1 0.08199 0.94998 0.69501 1
N9 N 1 0.58198 0.44998 0.19500 1
N10 N 1 0.41801 0.55000 0.19501 1
N11 N 1 0.91801 0.44998 0.19500 1
N12 N 1 0.75000 0.27462 0.33548 1
N13 N 1 0.75000 0.18580 0.51138 1
N14 N 1 0.25000 0.81417 0.51138 1
N15 N 1 0.25000 0.72536 0.33549 1
N16 N 1 0.08199 0.55000 0.19501 1
Zn1 Zn 1 0.75000 0.12513 0.70470 1
Zn2 Zn 1 0.25000 0.87485 0.70470 1
Zn3 Zn 1 0.75000 0.37485 0.20470 1
Zn4 Zn 1 0.25000 0.62512 0.20471 1
#End of data
```

```
data_C6 H6 N4 Zn/P1
_audit_creation_date          2009-12-07
_audit_creation_method        'Igor Baburin'
_chemical_formula_moiety
;
C6 H6 N4 Zn/P1
;
_chemical_formula_sum          'C6 H6 N4 Zn1'
_citation_special_details
;
File: dia_P1
;
_cell_length_a                 9.9802
_cell_length_b                 10.1065
_cell_length_c                 9.9842
_cell_angle_alpha              58.34
_cell_angle_beta               59.66
_cell_angle_gamma              59.29
_cell_volume                   697.2294
_cell_formula_units_Z          2
_symmetry_space_group_name_H-M 'P 1'
_symmetry_Int_Tables_number    1
_refine_ls_R_factor_all        0
loop_
_symmetry_equiv_pos_site_id
_symmetry_equiv_pos_as_xyz
1 x,y,z
loop_
_atom_site_label
_atom_site_type_symbol
_atom_site_symmetry_multiplicity
_atom_site_fract_x
_atom_site_fract_y
_atom_site_fract_z
_atom_site_occupancy
H1 H 1 0.11228 0.65892 0.52347 1
H2 H 1 0.22660 0.76818 0.63959 1
H3 H 1 0.61448 0.37792 0.47862 1
H4 H 1 0.80044 0.82168 0.27818 1
H5 H 1 0.14380 0.70627 0.15637 1
H6 H 1 0.97805 0.33114 0.59407 1
H7 H 1 0.85998 0.41360 0.84055 1
H8 H 1 0.73899 0.30519 0.18693 1
H9 H 1 0.35307 0.48577 0.00409 1
H10 H 1 0.49391 0.80028 0.86330 1
H11 H 1 0.37261 0.14541 0.75337 1
H12 H 1 0.45807 0.99493 0.38549 1
C1 C 1 0.23339 0.61566 0.53254 1
C2 C 1 0.29012 0.67005 0.58980 1
C3 C 1 0.49246 0.46896 0.50742 1
C4 C 1 0.88786 0.70185 0.32579 1
C5 C 1 0.05864 0.64450 0.26533 1
C6 C 1 0.97612 0.44953 0.49136 1
C7 C 1 0.73654 0.41171 0.92561 1
C8 C 1 0.67604 0.35864 0.09794 1
C9 C 1 0.47507 0.45117 0.00671 1
C10 C 1 0.46756 0.89191 0.74802 1
C11 C 1 0.40750 0.06285 0.69361 1
C12 C 1 0.45135 0.98855 0.50126 1
N1 N 1 0.36243 0.48791 0.48037 1
N2 N 1 0.45486 0.57640 0.57354 1
N3 N 1 0.83594 0.57763 0.46950 1
N4 N 1 0.11419 0.48378 0.37091 1
N5 N 1 0.60844 0.46986 0.86823 1
N6 N 1 0.50982 0.38428 0.14883 1
```

```
N7 N 1 0.49493 0.84546 0.62548 1  
N8 N 1 0.39748 0.12364 0.53670 1  
Zn1 Zn 1 0.34745 0.36286 0.38285 1  
Zn2 Zn 1 0.60149 0.60808 0.63110 1  
#End of data
```

```
data_C6 H6 N4 Zn/P212121
_audit_creation_date          2009-12-07
_audit_creation_method        'Igor Baburin'
_chemical_formula_moiety
;
C6 H6 N4 Zn/P212121
;
_chemical_formula_sum          'C6 H6 N4 Zn1'
_citation_special_details
;
File: dia_P212121
;
_cell_length_a                10.1421
_cell_length_b                9.5495
_cell_length_c                12.9073
_cell_angle_alpha             90
_cell_angle_beta              90
_cell_angle_gamma             90
_cell_volume                  1250.098
_cell_formula_units_Z         4
_symmetry_space_group_name_H-M 'P 1'
_symmetry_Int_Tables_number   1
_refine_ls_R_factor_all       0
loop_
_symmetry_equiv_pos_site_id
_symmetry_equiv_pos_as_xyz
1 x,y,z
loop_
_atom_site_label
_atom_site_type_symbol
_atom_site_symmetry_multiplicity
_atom_site_fract_x
_atom_site_fract_y
_atom_site_fract_z
_atom_site_occupancy
H1 H 1 0.66030 0.19091 0.87511 1
H2 H 1 0.83966 0.80904 0.37511 1
H3 H 1 0.16027 0.30903 0.12483 1
H4 H 1 0.58123 0.41932 0.99402 1
H5 H 1 0.91873 0.58062 0.49402 1
H6 H 1 0.08118 0.08058 0.00593 1
H7 H 1 0.46352 0.48279 0.68287 1
H8 H 1 0.03644 0.51718 0.18286 1
H9 H 1 0.96351 0.01714 0.31709 1
H10 H 1 0.68110 0.02898 0.13452 1
H11 H 1 0.81885 0.97098 0.63453 1
H12 H 1 0.18113 0.47100 0.86547 1
H13 H 1 0.44505 0.97028 0.03274 1
H14 H 1 0.05489 0.02968 0.53273 1
H15 H 1 0.94505 0.52964 0.96722 1
H16 H 1 0.72184 0.65102 0.96614 1
H17 H 1 0.77811 0.34892 0.46612 1
H18 H 1 0.22184 0.84893 0.03385 1
H19 H 1 0.27810 0.15103 0.53386 1
H20 H 1 0.55489 0.47031 0.46722 1
H21 H 1 0.31881 0.52896 0.36548 1
H22 H 1 0.53644 0.98280 0.81710 1
H23 H 1 0.41878 0.91936 0.50594 1
H24 H 1 0.33970 0.69091 0.62483 1
C1 C 1 0.60708 0.28517 0.85202 1
C2 C 1 0.89288 0.71479 0.35201 1
C3 C 1 0.10705 0.21477 0.14793 1
C4 C 1 0.56872 0.39947 0.91138 1
C5 C 1 0.93125 0.60048 0.41138 1
C6 C 1 0.06869 0.10046 0.08858 1
```

```
C7 C 1 0.50602 0.43439 0.75181 1
C8 C 1 0.99394 0.56557 0.25181 1
C9 C 1 0.00602 0.06556 0.24815 1
C10 C 1 0.65474 0.94108 0.08468 1
C11 C 1 0.84522 0.05887 0.58468 1
C12 C 1 0.15474 0.55888 0.91530 1
C13 C 1 0.53731 0.91157 0.03383 1
C14 C 1 0.96263 0.08841 0.53382 1
C15 C 1 0.03730 0.58838 0.96614 1
C16 C 1 0.67838 0.74555 0.99927 1
C17 C 1 0.82157 0.25441 0.49926 1
C18 C 1 0.17837 0.75440 0.00072 1
C19 C 1 0.32159 0.24555 0.50073 1
C20 C 1 0.46264 0.41156 0.46615 1
C21 C 1 0.34521 0.44109 0.41531 1
C22 C 1 0.49395 0.93440 0.74817 1
C23 C 1 0.43127 0.89949 0.58858 1
C24 C 1 0.39291 0.78518 0.64794 1
N1 N 1 0.56648 0.30782 0.75071 1
N2 N 1 0.93349 0.69212 0.25070 1
N3 N 1 0.06645 0.19214 0.24924 1
N4 N 1 0.50492 0.49432 0.84703 1
N5 N 1 0.99504 0.50563 0.34702 1
N6 N 1 0.00491 0.00562 0.15294 1
N7 N 1 0.74388 0.83512 0.06243 1
N8 N 1 0.75607 0.16484 0.56243 1
N9 N 1 0.24388 0.66484 0.93756 1
N10 N 1 0.55287 0.78691 0.97973 1
N11 N 1 0.94707 0.21305 0.47971 1
N12 N 1 0.05287 0.71303 0.02024 1
N13 N 1 0.44708 0.28692 0.52024 1
N14 N 1 0.25607 0.33510 0.43756 1
N15 N 1 0.49505 0.99433 0.65294 1
N16 N 1 0.43351 0.80783 0.74924 1
Zn1 Zn 1 0.42898 0.68628 0.87981 1
Zn2 Zn 1 0.07096 0.31365 0.37980 1
Zn3 Zn 1 0.92900 0.81367 0.12011 1
Zn4 Zn 1 0.57095 0.18629 0.62012 1
#End of data
```

```
data_P3121
_audit_creation_date          2010-03-02
_audit_creation_method        'Igor Baburin'
_chemical_formula_moiety
;
C6 H6 N4 Zn/dia_D final/0.001/-3764.5761
;
_chemical_formula_sum          'C6 H6 N4 Zn1'
_citation_special_details
;
File: dia_Dfinalsym.cif.
;
_cell_length_a                26.9495
_cell_length_b                26.9495
_cell_length_c                26.9495
_cell_angle_alpha             37.85
_cell_angle_beta              37.85
_cell_angle_gamma             37.85
_cell_volume                  6613.063
_cell_formula_units_Z         18
_symmetry_space_group_name_H-M 'P 1'
_symmetry_Int_Tables_number   1
_refine_ls_R_factor_all       0
loop_
_symmetry_equiv_pos_site_id
_symmetry_equiv_pos_as_xyz
1 x,y,z
loop_
_atom_site_label
_atom_site_type_symbol
_atom_site_symmetry_multiplicity
_atom_site_fract_x
_atom_site_fract_y
_atom_site_fract_z
_atom_site_occupancy
H1 H 1 0.17850 0.17308 0.09266 1
H2 H 1 0.87043 0.95628 0.95086 1
H3 H 1 0.39531 0.31488 0.40072 1
H4 H 1 0.77123 0.68538 0.76581 1
H5 H 1 0.57428 0.65470 0.66012 1
H6 H 1 0.21905 0.22857 0.21905 1
H7 H 1 0.11746 0.10794 0.10794 1
H8 H 1 0.62500 0.10418 0.10418 1
H9 H 1 0.32640 0.32640 0.84719 1
H10 H 1 0.68058 0.16359 0.83584 1
H11 H 1 0.28029 0.12500 0.60804 1
H12 H 1 0.38581 0.05807 0.90280 1
H13 H 1 0.44945 0.60472 0.93247 1
H14 H 1 0.16028 0.48803 0.00501 1
H15 H 1 0.56603 0.16069 0.67688 1
H16 H 1 0.45465 0.34380 0.93846 1
H17 H 1 0.38291 0.89910 0.78825 1
H18 H 1 0.18586 0.29671 0.78052 1
H19 H 1 0.18559 0.66940 0.07474 1
H20 H 1 0.06301 0.35720 0.01981 1
H21 H 1 0.46426 0.50745 0.80165 1
H22 H 1 0.91276 0.57537 0.61856 1
H23 H 1 0.32522 0.28202 0.61941 1
H24 H 1 0.83757 0.17497 0.88077 1
H25 H 1 0.05267 0.36229 0.86696 1
H26 H 1 0.31140 0.49712 0.80673 1
H27 H 1 0.25118 0.75585 0.94156 1
H28 H 1 0.42028 0.23457 0.72989 1
H29 H 1 0.45679 0.95211 0.64250 1
H30 H 1 0.50767 0.19806 0.01235 1
```



|     |   |   |         |         |         |   |
|-----|---|---|---------|---------|---------|---|
| H31 | H | 1 | 0.39719 | 0.10299 | 0.05980 | 1 |
| H32 | H | 1 | 0.22496 | 0.63030 | 0.74115 | 1 |
| H33 | H | 1 | 0.04358 | 0.56057 | 0.71583 | 1 |
| H34 | H | 1 | 0.88196 | 0.40274 | 0.88196 | 1 |
| H35 | H | 1 | 0.33016 | 0.33016 | 0.33968 | 1 |
| H36 | H | 1 | 0.21025 | 0.21567 | 0.12983 | 1 |
| H37 | H | 1 | 0.51183 | 0.50642 | 0.42599 | 1 |
| H38 | H | 1 | 0.20377 | 0.28961 | 0.28420 | 1 |
| H39 | H | 1 | 0.72864 | 0.64821 | 0.73405 | 1 |
| H40 | H | 1 | 0.10456 | 0.01872 | 0.09915 | 1 |
| H41 | H | 1 | 0.90761 | 0.98803 | 0.99345 | 1 |
| H42 | H | 1 | 0.55238 | 0.56190 | 0.55238 | 1 |
| H43 | H | 1 | 0.45079 | 0.44127 | 0.44127 | 1 |
| H44 | H | 1 | 0.95833 | 0.43751 | 0.43751 | 1 |
| H45 | H | 1 | 0.65974 | 0.65974 | 0.18052 | 1 |
| H46 | H | 1 | 0.01391 | 0.49692 | 0.16918 | 1 |
| H47 | H | 1 | 0.61362 | 0.45833 | 0.94137 | 1 |
| H48 | H | 1 | 0.71915 | 0.39140 | 0.23614 | 1 |
| H49 | H | 1 | 0.78279 | 0.93806 | 0.26581 | 1 |
| H50 | H | 1 | 0.49361 | 0.82136 | 0.33835 | 1 |
| H51 | H | 1 | 0.89936 | 0.49402 | 0.01021 | 1 |
| H52 | H | 1 | 0.78799 | 0.67713 | 0.27180 | 1 |
| H53 | H | 1 | 0.71624 | 0.23243 | 0.12158 | 1 |
| H54 | H | 1 | 0.51919 | 0.63004 | 0.11385 | 1 |
| H55 | H | 1 | 0.51893 | 0.00274 | 0.40808 | 1 |
| H56 | H | 1 | 0.39634 | 0.69054 | 0.35315 | 1 |
| H57 | H | 1 | 0.79759 | 0.84078 | 0.13498 | 1 |
| H58 | H | 1 | 0.24609 | 0.90870 | 0.95190 | 1 |
| H59 | H | 1 | 0.65855 | 0.61535 | 0.95275 | 1 |
| H60 | H | 1 | 0.17091 | 0.50830 | 0.21410 | 1 |
| H61 | H | 1 | 0.38601 | 0.69562 | 0.20030 | 1 |
| H62 | H | 1 | 0.64474 | 0.83045 | 0.14006 | 1 |
| H63 | H | 1 | 0.58451 | 0.08918 | 0.27490 | 1 |
| H64 | H | 1 | 0.75362 | 0.56791 | 0.06323 | 1 |
| H65 | H | 1 | 0.79013 | 0.28545 | 0.97584 | 1 |
| H66 | H | 1 | 0.84101 | 0.53139 | 0.34568 | 1 |
| H67 | H | 1 | 0.73052 | 0.43633 | 0.39313 | 1 |
| H68 | H | 1 | 0.55829 | 0.96363 | 0.07448 | 1 |
| H69 | H | 1 | 0.37692 | 0.89390 | 0.04917 | 1 |
| H70 | H | 1 | 0.21529 | 0.73608 | 0.21529 | 1 |
| H71 | H | 1 | 0.66349 | 0.66349 | 0.67301 | 1 |
| H72 | H | 1 | 0.54359 | 0.54901 | 0.46316 | 1 |
| H73 | H | 1 | 0.84517 | 0.83975 | 0.75932 | 1 |
| H74 | H | 1 | 0.53710 | 0.62295 | 0.61753 | 1 |
| H75 | H | 1 | 0.06197 | 0.98155 | 0.06739 | 1 |
| H76 | H | 1 | 0.43790 | 0.35205 | 0.43248 | 1 |
| H77 | H | 1 | 0.24094 | 0.32137 | 0.32678 | 1 |
| H78 | H | 1 | 0.88572 | 0.89524 | 0.88572 | 1 |
| H79 | H | 1 | 0.78412 | 0.77460 | 0.77460 | 1 |
| H80 | H | 1 | 0.29167 | 0.77085 | 0.77085 | 1 |
| H81 | H | 1 | 0.99307 | 0.99307 | 0.51385 | 1 |
| H82 | H | 1 | 0.34725 | 0.83026 | 0.50252 | 1 |
| H83 | H | 1 | 0.94695 | 0.79167 | 0.27470 | 1 |
| H84 | H | 1 | 0.05248 | 0.72474 | 0.56947 | 1 |
| H85 | H | 1 | 0.11612 | 0.27139 | 0.59914 | 1 |
| H86 | H | 1 | 0.82694 | 0.15469 | 0.67168 | 1 |
| H87 | H | 1 | 0.23269 | 0.82736 | 0.34354 | 1 |
| H88 | H | 1 | 0.12132 | 0.01047 | 0.60513 | 1 |
| H89 | H | 1 | 0.04958 | 0.56577 | 0.45491 | 1 |
| H90 | H | 1 | 0.85252 | 0.96337 | 0.44718 | 1 |
| H91 | H | 1 | 0.85226 | 0.33607 | 0.74141 | 1 |
| H92 | H | 1 | 0.72967 | 0.02387 | 0.68648 | 1 |
| H93 | H | 1 | 0.13092 | 0.17412 | 0.46831 | 1 |
| H94 | H | 1 | 0.57943 | 0.24204 | 0.28523 | 1 |
| H95 | H | 1 | 0.99188 | 0.94869 | 0.28608 | 1 |

H96 H 1 0.50424 0.84163 0.54744 1  
H97 H 1 0.71934 0.02895 0.53363 1  
H98 H 1 0.97807 0.16378 0.47340 1  
H99 H 1 0.91784 0.42252 0.60823 1  
H100 H 1 0.08695 0.90124 0.39656 1  
H101 H 1 0.12346 0.61878 0.30917 1  
H102 H 1 0.17434 0.86473 0.67901 1  
H103 H 1 0.06386 0.76966 0.72646 1  
H104 H 1 0.89162 0.29697 0.40781 1  
H105 H 1 0.71025 0.22724 0.38250 1  
H106 H 1 0.54863 0.06941 0.54863 1  
H107 H 1 0.99683 0.99683 0.00635 1  
H108 H 1 0.87692 0.88234 0.79650 1  
C1 C 1 0.21351 0.21194 0.04684 1  
C2 C 1 0.82462 0.99129 0.98972 1  
C3 C 1 0.43417 0.26906 0.43573 1  
C4 C 1 0.78753 0.62087 0.78597 1  
C5 C 1 0.50976 0.67486 0.67642 1  
C6 C 1 0.69712 0.06811 0.06811 1  
C7 C 1 0.29034 0.29034 0.91933 1  
C8 C 1 0.74504 0.10634 0.82201 1  
C9 C 1 0.26645 0.18949 0.55078 1  
C10 C 1 0.32856 0.04423 0.96727 1  
C11 C 1 0.51834 0.59530 0.87963 1  
C12 C 1 0.15086 0.43519 0.07389 1  
C13 C 1 0.18298 0.30071 0.18298 1  
C14 C 1 0.18960 0.07187 0.07187 1  
C15 C 1 0.62160 0.11253 0.64897 1  
C16 C 1 0.42674 0.39938 0.89030 1  
C17 C 1 0.33475 0.87119 0.84383 1  
C18 C 1 0.25510 0.28246 0.74602 1  
C19 C 1 0.17134 0.63490 0.14398 1  
C20 C 1 0.03658 0.37809 0.98684 1  
C21 C 1 0.43129 0.48103 0.82254 1  
C22 C 1 0.93365 0.54240 0.59214 1  
C23 C 1 0.32446 0.27472 0.66597 1  
C24 C 1 0.83028 0.22152 0.88001 1  
C25 C 1 0.03345 0.37935 0.90738 1  
C26 C 1 0.35182 0.47789 0.82379 1  
C27 C 1 0.26824 0.79627 0.92234 1  
C28 C 1 0.37555 0.24949 0.72146 1  
C29 C 1 0.47171 0.94368 0.59777 1  
C30 C 1 0.49924 0.15333 0.02726 1  
C31 C 1 0.44374 0.10224 0.05250 1  
C32 C 1 0.19046 0.69954 0.72690 1  
C33 C 1 0.29409 0.29409 0.41182 1  
C34 C 1 0.99074 0.62945 0.70641 1  
C35 C 1 0.84589 0.47488 0.84589 1  
C36 C 1 0.23042 0.23198 0.06531 1  
C37 C 1 0.54684 0.54528 0.38017 1  
C38 C 1 0.15795 0.32462 0.32306 1  
C39 C 1 0.76750 0.60239 0.76907 1  
C40 C 1 0.12087 0.95420 0.11930 1  
C41 C 1 0.84309 0.00819 0.00976 1  
C42 C 1 0.03045 0.40144 0.40144 1  
C43 C 1 0.62367 0.62367 0.25266 1  
C44 C 1 0.07838 0.43967 0.15534 1  
C45 C 1 0.59979 0.52283 0.88411 1  
C46 C 1 0.66190 0.37757 0.30060 1  
C47 C 1 0.85167 0.92864 0.21297 1  
C48 C 1 0.48419 0.76852 0.40723 1  
C49 C 1 0.51631 0.63404 0.51631 1  
C50 C 1 0.52293 0.40520 0.40520 1  
C51 C 1 0.95494 0.44586 0.98230 1  
C52 C 1 0.76007 0.73272 0.22364 1

|      |   |   |         |         |         |   |
|------|---|---|---------|---------|---------|---|
| C53  | C | 1 | 0.66808 | 0.20452 | 0.17716 | 1 |
| C54  | C | 1 | 0.58843 | 0.61579 | 0.07935 | 1 |
| C55  | C | 1 | 0.50468 | 0.96824 | 0.47732 | 1 |
| C56  | C | 1 | 0.36992 | 0.71143 | 0.32018 | 1 |
| C57  | C | 1 | 0.76462 | 0.81436 | 0.15587 | 1 |
| C58  | C | 1 | 0.26698 | 0.87573 | 0.92547 | 1 |
| C59  | C | 1 | 0.65779 | 0.60806 | 0.99930 | 1 |
| C60  | C | 1 | 0.16361 | 0.55486 | 0.21335 | 1 |
| C61  | C | 1 | 0.36678 | 0.71268 | 0.24071 | 1 |
| C62  | C | 1 | 0.68515 | 0.81122 | 0.15712 | 1 |
| C63  | C | 1 | 0.60157 | 0.12960 | 0.25567 | 1 |
| C64  | C | 1 | 0.70889 | 0.58282 | 0.05479 | 1 |
| C65  | C | 1 | 0.80504 | 0.27701 | 0.93111 | 1 |
| C66  | C | 1 | 0.83257 | 0.48666 | 0.36060 | 1 |
| C67  | C | 1 | 0.77708 | 0.43557 | 0.38583 | 1 |
| C68  | C | 1 | 0.52379 | 0.03287 | 0.06023 | 1 |
| C69  | C | 1 | 0.62742 | 0.62742 | 0.74515 | 1 |
| C70  | C | 1 | 0.32408 | 0.96279 | 0.03975 | 1 |
| C71  | C | 1 | 0.17922 | 0.80822 | 0.17922 | 1 |
| C72  | C | 1 | 0.56375 | 0.56532 | 0.39865 | 1 |
| C73  | C | 1 | 0.88017 | 0.87861 | 0.71351 | 1 |
| C74  | C | 1 | 0.49129 | 0.65795 | 0.65639 | 1 |
| C75  | C | 1 | 0.10084 | 0.93573 | 0.10240 | 1 |
| C76  | C | 1 | 0.45420 | 0.28754 | 0.45264 | 1 |
| C77  | C | 1 | 0.17642 | 0.34153 | 0.34309 | 1 |
| C78  | C | 1 | 0.36379 | 0.73478 | 0.73478 | 1 |
| C79  | C | 1 | 0.95700 | 0.95700 | 0.58599 | 1 |
| C80  | C | 1 | 0.41171 | 0.77301 | 0.48868 | 1 |
| C81  | C | 1 | 0.93312 | 0.85616 | 0.21745 | 1 |
| C82  | C | 1 | 0.99523 | 0.71090 | 0.63393 | 1 |
| C83  | C | 1 | 0.18501 | 0.26197 | 0.54630 | 1 |
| C84  | C | 1 | 0.81752 | 0.10185 | 0.74056 | 1 |
| C85  | C | 1 | 0.84965 | 0.96738 | 0.84965 | 1 |
| C86  | C | 1 | 0.85626 | 0.73853 | 0.73853 | 1 |
| C87  | C | 1 | 0.28827 | 0.77919 | 0.31563 | 1 |
| C88  | C | 1 | 0.09341 | 0.06605 | 0.55697 | 1 |
| C89  | C | 1 | 0.00142 | 0.53786 | 0.51050 | 1 |
| C90  | C | 1 | 0.92176 | 0.94912 | 0.41268 | 1 |
| C91  | C | 1 | 0.83801 | 0.30157 | 0.81065 | 1 |
| C92  | C | 1 | 0.70325 | 0.04476 | 0.65351 | 1 |
| C93  | C | 1 | 0.09796 | 0.14769 | 0.48920 | 1 |
| C94  | C | 1 | 0.60032 | 0.20907 | 0.25881 | 1 |
| C95  | C | 1 | 0.99113 | 0.94139 | 0.33264 | 1 |
| C96  | C | 1 | 0.49694 | 0.88819 | 0.54668 | 1 |
| C97  | C | 1 | 0.70011 | 0.04601 | 0.57404 | 1 |
| C98  | C | 1 | 0.01849 | 0.14456 | 0.49046 | 1 |
| C99  | C | 1 | 0.93490 | 0.46293 | 0.58900 | 1 |
| C100 | C | 1 | 0.04222 | 0.91615 | 0.38813 | 1 |
| C101 | C | 1 | 0.13837 | 0.61035 | 0.26444 | 1 |
| C102 | C | 1 | 0.16590 | 0.82000 | 0.69393 | 1 |
| C103 | C | 1 | 0.11041 | 0.76890 | 0.71917 | 1 |
| C104 | C | 1 | 0.85713 | 0.36621 | 0.39357 | 1 |
| C105 | C | 1 | 0.96076 | 0.96076 | 0.07849 | 1 |
| C106 | C | 1 | 0.65741 | 0.29612 | 0.37308 | 1 |
| C107 | C | 1 | 0.51256 | 0.14155 | 0.51256 | 1 |
| C108 | C | 1 | 0.89708 | 0.89864 | 0.73198 | 1 |
| N1   | N | 1 | 0.25118 | 0.24962 | 0.95391 | 1 |
| N2   | N | 1 | 0.73169 | 0.02896 | 0.02740 | 1 |
| N3   | N | 1 | 0.47185 | 0.17614 | 0.47341 | 1 |
| N4   | N | 1 | 0.83693 | 0.53966 | 0.83536 | 1 |
| N5   | N | 1 | 0.42856 | 0.72425 | 0.72581 | 1 |
| N6   | N | 1 | 0.76570 | 0.02077 | 0.89109 | 1 |
| N7   | N | 1 | 0.33554 | 0.21014 | 0.46521 | 1 |
| N8   | N | 1 | 0.24299 | 0.11332 | 0.98792 | 1 |
| N9   | N | 1 | 0.53621 | 0.66161 | 0.79128 | 1 |

|     |    |   |         |         |         |   |
|-----|----|---|---------|---------|---------|---|
| N10 | N  | 1 | 0.21716 | 0.34684 | 0.09177 | 1 |
| N11 | N  | 1 | 0.95296 | 0.44646 | 0.93189 | 1 |
| N12 | N  | 1 | 0.37633 | 0.39741 | 0.89090 | 1 |
| N13 | N  | 1 | 0.33535 | 0.82078 | 0.84185 | 1 |
| N14 | N  | 1 | 0.28765 | 0.26657 | 0.78114 | 1 |
| N15 | N  | 1 | 0.48879 | 0.00336 | 0.50987 | 1 |
| N16 | N  | 1 | 0.08643 | 0.33586 | 0.93906 | 1 |
| N17 | N  | 1 | 0.38350 | 0.53088 | 0.78031 | 1 |
| N18 | N  | 1 | 0.89142 | 0.49461 | 0.64199 | 1 |
| N19 | N  | 1 | 0.40109 | 0.25371 | 0.65052 | 1 |
| N20 | N  | 1 | 0.80926 | 0.20607 | 0.95665 | 1 |
| N21 | N  | 1 | 0.42829 | 0.17887 | 0.03149 | 1 |
| N22 | N  | 1 | 0.55892 | 0.06542 | 0.04435 | 1 |
| N23 | N  | 1 | 0.90239 | 0.64732 | 0.77272 | 1 |
| N24 | N  | 1 | 0.27981 | 0.28137 | 0.98410 | 1 |
| N25 | N  | 1 | 0.58452 | 0.58296 | 0.28725 | 1 |
| N26 | N  | 1 | 0.06503 | 0.36230 | 0.36073 | 1 |
| N27 | N  | 1 | 0.80518 | 0.50947 | 0.80674 | 1 |
| N28 | N  | 1 | 0.17026 | 0.87299 | 0.16870 | 1 |
| N29 | N  | 1 | 0.76189 | 0.05758 | 0.05915 | 1 |
| N30 | N  | 1 | 0.09903 | 0.35410 | 0.22443 | 1 |
| N31 | N  | 1 | 0.66887 | 0.54348 | 0.79854 | 1 |
| N32 | N  | 1 | 0.57632 | 0.44665 | 0.32126 | 1 |
| N33 | N  | 1 | 0.86955 | 0.99495 | 0.12462 | 1 |
| N34 | N  | 1 | 0.55050 | 0.68017 | 0.42510 | 1 |
| N35 | N  | 1 | 0.28629 | 0.77979 | 0.26522 | 1 |
| N36 | N  | 1 | 0.70967 | 0.73074 | 0.22423 | 1 |
| N37 | N  | 1 | 0.66868 | 0.15411 | 0.17519 | 1 |
| N38 | N  | 1 | 0.62098 | 0.59991 | 0.11448 | 1 |
| N39 | N  | 1 | 0.82213 | 0.33670 | 0.84320 | 1 |
| N40 | N  | 1 | 0.41977 | 0.66920 | 0.27239 | 1 |
| N41 | N  | 1 | 0.71683 | 0.86421 | 0.11364 | 1 |
| N42 | N  | 1 | 0.22475 | 0.82795 | 0.97533 | 1 |
| N43 | N  | 1 | 0.73443 | 0.58704 | 0.98385 | 1 |
| N44 | N  | 1 | 0.14260 | 0.53940 | 0.28998 | 1 |
| N45 | N  | 1 | 0.76163 | 0.51220 | 0.36482 | 1 |
| N46 | N  | 1 | 0.89225 | 0.39875 | 0.37768 | 1 |
| N47 | N  | 1 | 0.23573 | 0.98066 | 0.10605 | 1 |
| N48 | N  | 1 | 0.61314 | 0.61471 | 0.31744 | 1 |
| N49 | N  | 1 | 0.91785 | 0.91629 | 0.62058 | 1 |
| N50 | N  | 1 | 0.39836 | 0.69563 | 0.69407 | 1 |
| N51 | N  | 1 | 0.13851 | 0.84280 | 0.14007 | 1 |
| N52 | N  | 1 | 0.50359 | 0.20633 | 0.50203 | 1 |
| N53 | N  | 1 | 0.09522 | 0.39091 | 0.39248 | 1 |
| N54 | N  | 1 | 0.43237 | 0.68744 | 0.55776 | 1 |
| N55 | N  | 1 | 0.00221 | 0.87681 | 0.13188 | 1 |
| N56 | N  | 1 | 0.90965 | 0.77998 | 0.65459 | 1 |
| N57 | N  | 1 | 0.20288 | 0.32828 | 0.45795 | 1 |
| N58 | N  | 1 | 0.88383 | 0.01350 | 0.75844 | 1 |
| N59 | N  | 1 | 0.61963 | 0.11312 | 0.59856 | 1 |
| N60 | N  | 1 | 0.04300 | 0.06407 | 0.55757 | 1 |
| N61 | N  | 1 | 0.00201 | 0.48744 | 0.50852 | 1 |
| N62 | N  | 1 | 0.95431 | 0.93324 | 0.44781 | 1 |
| N63 | N  | 1 | 0.15546 | 0.67003 | 0.17653 | 1 |
| N64 | N  | 1 | 0.75310 | 0.00253 | 0.60572 | 1 |
| N65 | N  | 1 | 0.05017 | 0.19755 | 0.44697 | 1 |
| N66 | N  | 1 | 0.55809 | 0.16128 | 0.30866 | 1 |
| N67 | N  | 1 | 0.06776 | 0.92038 | 0.31718 | 1 |
| N68 | N  | 1 | 0.47593 | 0.87274 | 0.62331 | 1 |
| N69 | N  | 1 | 0.09496 | 0.84553 | 0.69815 | 1 |
| N70 | N  | 1 | 0.22559 | 0.73209 | 0.71102 | 1 |
| N71 | N  | 1 | 0.56906 | 0.31399 | 0.43939 | 1 |
| N72 | N  | 1 | 0.94647 | 0.94804 | 0.65077 | 1 |
| Zn1 | Zn | 1 | 0.52587 | 0.21552 | 0.55162 | 1 |
| Zn2 | Zn | 1 | 0.32939 | 0.30364 | 0.99329 | 1 |

```
Zn3 Zn 1 0.77107 0.10717 0.08142 1
Zn4 Zn 1 0.21942 0.24517 0.90907 1
Zn5 Zn 1 0.80073 0.46463 0.77498 1
Zn6 Zn 1 0.35352 0.66387 0.68962 1
Zn7 Zn 1 0.85920 0.54885 0.88495 1
Zn8 Zn 1 0.66273 0.63698 0.32663 1
Zn9 Zn 1 0.10441 0.44050 0.41475 1
Zn10 Zn 1 0.55276 0.57851 0.24241 1
Zn11 Zn 1 0.13406 0.79796 0.10831 1
Zn12 Zn 1 0.68685 0.99720 0.02295 1
Zn13 Zn 1 0.19253 0.88218 0.21828 1
Zn14 Zn 1 0.99606 0.97031 0.65996 1
Zn15 Zn 1 0.43774 0.77384 0.74809 1
Zn16 Zn 1 0.88609 0.91184 0.57574 1
Zn17 Zn 1 0.46739 0.13130 0.44165 1
Zn18 Zn 1 0.02018 0.33053 0.35628 1
#End of data_P3121
```

```
data_C6 H6 N4 Zn/P41212 - ..2
_audit_creation_date          2009-12-07
_audit_creation_method        'Igor Baburin'
_chemical_formula_moiety
;
C6 H6 N4 Zn/P41212 - ..2
;
_chemical_formula_sum          'C6 H6 N4 Zn1'
_citation_special_details
;
File: dia_P41212_small
;
_cell_length_a                 10.3414
_cell_length_b                 10.3414
_cell_length_c                 11.8156
_cell_angle_alpha              90
_cell_angle_beta               90
_cell_angle_gamma              90
_cell_volume                   1263.614
_cell_formula_units_Z          4
_symmetry_space_group_name_H-M 'P 1'
_symmetry_Int_Tables_number    1
_refine_ls_R_factor_all        0
loop_
_symmetry_equiv_pos_site_id
_symmetry_equiv_pos_as_xyz
1 x,y,z
loop_
_atom_site_label
_atom_site_type_symbol
_atom_site_symmetry_multiplicity
_atom_site_fract_x
_atom_site_fract_y
_atom_site_fract_z
_atom_site_occupancy
H1 H 1 0.81107 0.19962 0.46634 1
H2 H 1 0.18917 0.80045 0.96635 1
H3 H 1 0.68910 0.69951 0.78367 1
H4 H 1 0.31109 0.30033 0.28365 1
H5 H 1 0.80037 0.18916 0.03364 1
H6 H 1 0.19958 0.81105 0.53367 1
H7 H 1 0.30031 0.31108 0.71635 1
H8 H 1 0.76571 0.43564 0.35995 1
H9 H 1 0.23452 0.56441 0.85997 1
H10 H 1 0.73446 0.93556 0.89004 1
H11 H 1 0.26574 0.06429 0.39003 1
H12 H 1 0.56435 0.23452 0.14005 1
H13 H 1 0.43561 0.76569 0.64006 1
H14 H 1 0.06426 0.26570 0.60998 1
H15 H 1 0.71109 0.47870 0.71303 1
H16 H 1 0.28848 0.52111 0.21308 1
H17 H 1 0.78857 0.97880 0.53694 1
H18 H 1 0.21109 0.02121 0.03696 1
H19 H 1 0.52107 0.28853 0.78691 1
H20 H 1 0.47869 0.71117 0.28695 1
H21 H 1 0.02113 0.21117 0.96305 1
H22 H 1 0.97872 0.78868 0.46306 1
H23 H 1 0.93557 0.73437 0.10994 1
H24 H 1 0.69954 0.68901 0.21634 1
C1 C 1 0.78282 0.29238 0.50258 1
C2 C 1 0.21727 0.70762 0.00259 1
C3 C 1 0.71723 0.79231 0.74742 1
C4 C 1 0.28284 0.20755 0.24740 1
C5 C 1 0.70757 0.21727 0.99740 1
C6 C 1 0.29235 0.78281 0.49742 1
```

C7 C 1 0.20754 0.28284 0.75261 1  
C8 C 1 0.75947 0.40963 0.44926 1  
C9 C 1 0.24064 0.59039 0.94928 1  
C10 C 1 0.74060 0.90957 0.80073 1  
C11 C 1 0.25948 0.09030 0.30072 1  
C12 C 1 0.59035 0.24065 0.05072 1  
C13 C 1 0.40959 0.75946 0.55074 1  
C14 C 1 0.09028 0.25947 0.69929 1  
C15 C 1 0.73063 0.43485 0.63076 1  
C16 C 1 0.26913 0.56506 0.13080 1  
C17 C 1 0.76916 0.93486 0.61922 1  
C18 C 1 0.23065 0.06509 0.11924 1  
C19 C 1 0.56503 0.26916 0.86919 1  
C20 C 1 0.43482 0.73069 0.36924 1  
C21 C 1 0.06504 0.23070 0.88078 1  
C22 C 1 0.93484 0.76922 0.38077 1  
C23 C 1 0.90957 0.74056 0.19926 1  
C24 C 1 0.79233 0.71721 0.25258 1  
N1 N 1 0.76421 0.30880 0.61801 1  
N2 N 1 0.23566 0.69112 0.11806 1  
N3 N 1 0.73568 0.80879 0.63195 1  
N4 N 1 0.26425 0.19113 0.13194 1  
N5 N 1 0.69108 0.23567 0.88194 1  
N6 N 1 0.30878 0.76424 0.38198 1  
N7 N 1 0.19111 0.26429 0.86806 1  
N8 N 1 0.72618 0.49977 0.53119 1  
N9 N 1 0.27374 0.50017 0.03121 1  
N10 N 1 0.77372 0.99976 0.71879 1  
N11 N 1 0.22617 0.00016 0.21881 1  
N12 N 1 0.50013 0.27378 0.96878 1  
N13 N 1 0.49977 0.72620 0.46881 1  
N14 N 1 0.00014 0.22620 0.78121 1  
N15 N 1 0.99974 0.77374 0.28120 1  
N16 N 1 0.80878 0.73571 0.36803 1  
Zn1 Zn 1 0.80963 0.19027 0.75000 1  
Zn2 Zn 1 0.19024 0.80965 0.25000 1  
Zn3 Zn 1 0.30970 0.30969 0.00000 1  
Zn4 Zn 1 0.69029 0.69033 0.50000 1  
#End of data

```
data_C6 H6 N4 Zn/P41212
_audit_creation_date          2009-12-07
_audit_creation_method        'Igor Baburin'
_chemical_formula_moiety
;
C6 H6 N4 Zn/P41212
;
_chemical_formula_sum          'C6 H6 N4 Zn1'
_citation_special_details
;
File: P41212.cif.
;
_cell_length_a                 13.9293
_cell_length_b                 13.9293
_cell_length_c                 15.2321
_cell_angle_alpha              90
_cell_angle_beta               90
_cell_angle_gamma              90
_cell_volume                   2955.414
_cell_formula_units_Z          8
_symmetry_space_group_name_H-M 'P 1'
_symmetry_Int_Tables_number    1
_refine_ls_R_factor_all        0
loop_
_symmetry_equiv_pos_site_id
_symmetry_equiv_pos_as_xyz
1 x,y,z
loop_
_atom_site_label
_atom_site_type_symbol
_atom_site_symmetry_multiplicity
_atom_site_fract_x
_atom_site_fract_y
_atom_site_fract_z
_atom_site_occupancy
H1 H 1 0.61372 0.13992 0.78311 1
H2 H 1 0.38628 0.86008 0.28311 1
H3 H 1 0.88633 0.63999 0.46691 1
H4 H 1 0.11366 0.36001 0.96691 1
H5 H 1 0.86009 0.38627 0.71689 1
H6 H 1 0.13991 0.61373 0.21690 1
H7 H 1 0.36001 0.11367 0.03310 1
H8 H 1 0.52959 0.27122 0.89865 1
H9 H 1 0.47041 0.72878 0.39865 1
H10 H 1 0.97048 0.77116 0.35127 1
H11 H 1 0.02952 0.22884 0.85127 1
H12 H 1 0.72878 0.47041 0.60135 1
H13 H 1 0.27121 0.52959 0.10136 1
H14 H 1 0.22885 0.02952 0.14874 1
H15 H 1 0.67824 0.05929 0.04437 1
H16 H 1 0.32176 0.94071 0.54437 1
H17 H 1 0.82180 0.55909 0.20572 1
H18 H 1 0.17820 0.44092 0.70573 1
H19 H 1 0.94072 0.32176 0.45563 1
H20 H 1 0.05928 0.67824 0.95563 1
H21 H 1 0.44093 0.17820 0.29428 1
H22 H 1 0.57274 0.53082 0.31153 1
H23 H 1 0.42725 0.46918 0.81153 1
H24 H 1 0.92721 0.03082 0.93852 1
H25 H 1 0.07280 0.96919 0.43852 1
H26 H 1 0.46920 0.42727 0.18846 1
H27 H 1 0.53080 0.57272 0.68846 1
H28 H 1 0.96920 0.07278 0.56149 1
H29 H 1 0.72406 0.27594 0.25000 1
H30 H 1 0.27594 0.72406 0.75000 1
```



|     |   |   |         |         |         |   |
|-----|---|---|---------|---------|---------|---|
| H31 | H | 1 | 0.22408 | 0.22409 | 0.50000 | 1 |
| H32 | H | 1 | 0.45833 | 0.58580 | 0.96017 | 1 |
| H33 | H | 1 | 0.54167 | 0.41419 | 0.46016 | 1 |
| H34 | H | 1 | 0.04167 | 0.08570 | 0.28996 | 1 |
| H35 | H | 1 | 0.95833 | 0.91431 | 0.78996 | 1 |
| H36 | H | 1 | 0.41419 | 0.54167 | 0.53983 | 1 |
| H37 | H | 1 | 0.58581 | 0.45833 | 0.03982 | 1 |
| H38 | H | 1 | 0.91431 | 0.95833 | 0.21006 | 1 |
| H39 | H | 1 | 0.68080 | 0.68080 | 0.50000 | 1 |
| H40 | H | 1 | 0.31920 | 0.31920 | 0.00000 | 1 |
| H41 | H | 1 | 0.18086 | 0.81914 | 0.25000 | 1 |
| H42 | H | 1 | 0.81914 | 0.18086 | 0.75000 | 1 |
| H43 | H | 1 | 0.08570 | 0.04167 | 0.71006 | 1 |
| H44 | H | 1 | 0.77592 | 0.77592 | 0.00000 | 1 |
| H45 | H | 1 | 0.03080 | 0.92723 | 0.06150 | 1 |
| H46 | H | 1 | 0.55908 | 0.82180 | 0.79428 | 1 |
| H47 | H | 1 | 0.77115 | 0.97047 | 0.64873 | 1 |
| H48 | H | 1 | 0.63998 | 0.88632 | 0.53310 | 1 |
| C1  | C | 1 | 0.61520 | 0.14295 | 0.85466 | 1 |
| C2  | C | 1 | 0.38480 | 0.85705 | 0.35467 | 1 |
| C3  | C | 1 | 0.88485 | 0.64293 | 0.39535 | 1 |
| C4  | C | 1 | 0.11514 | 0.35707 | 0.89535 | 1 |
| C5  | C | 1 | 0.85706 | 0.38480 | 0.64534 | 1 |
| C6  | C | 1 | 0.14294 | 0.61521 | 0.14534 | 1 |
| C7  | C | 1 | 0.35708 | 0.11515 | 0.10466 | 1 |
| C8  | C | 1 | 0.57302 | 0.20781 | 0.91178 | 1 |
| C9  | C | 1 | 0.42698 | 0.79219 | 0.41179 | 1 |
| C10 | C | 1 | 0.92705 | 0.70773 | 0.33819 | 1 |
| C11 | C | 1 | 0.07294 | 0.29227 | 0.83819 | 1 |
| C12 | C | 1 | 0.79219 | 0.42698 | 0.58822 | 1 |
| C13 | C | 1 | 0.20781 | 0.57302 | 0.08823 | 1 |
| C14 | C | 1 | 0.29228 | 0.07295 | 0.16182 | 1 |
| C15 | C | 1 | 0.64903 | 0.09961 | 0.98903 | 1 |
| C16 | C | 1 | 0.35097 | 0.90038 | 0.48904 | 1 |
| C17 | C | 1 | 0.85104 | 0.59947 | 0.26102 | 1 |
| C18 | C | 1 | 0.14896 | 0.40053 | 0.76102 | 1 |
| C19 | C | 1 | 0.90039 | 0.35097 | 0.51097 | 1 |
| C20 | C | 1 | 0.09961 | 0.64903 | 0.01097 | 1 |
| C21 | C | 1 | 0.40054 | 0.14895 | 0.23899 | 1 |
| C22 | C | 1 | 0.58931 | 0.46242 | 0.28053 | 1 |
| C23 | C | 1 | 0.41069 | 0.53757 | 0.78053 | 1 |
| C24 | C | 1 | 0.91066 | 0.96241 | 0.96949 | 1 |
| C25 | C | 1 | 0.08935 | 0.03760 | 0.46949 | 1 |
| C26 | C | 1 | 0.53759 | 0.41071 | 0.21946 | 1 |
| C27 | C | 1 | 0.46241 | 0.58928 | 0.71946 | 1 |
| C28 | C | 1 | 0.03761 | 0.08933 | 0.53053 | 1 |
| C29 | C | 1 | 0.66866 | 0.33134 | 0.25000 | 1 |
| C30 | C | 1 | 0.33134 | 0.66866 | 0.75000 | 1 |
| C31 | C | 1 | 0.16869 | 0.16868 | 0.50000 | 1 |
| C32 | C | 1 | 0.44791 | 0.51158 | 0.98071 | 1 |
| C33 | C | 1 | 0.55209 | 0.48842 | 0.48071 | 1 |
| C34 | C | 1 | 0.05214 | 0.01150 | 0.26934 | 1 |
| C35 | C | 1 | 0.94787 | 0.98850 | 0.76934 | 1 |
| C36 | C | 1 | 0.48842 | 0.55208 | 0.51929 | 1 |
| C37 | C | 1 | 0.51158 | 0.44791 | 0.01928 | 1 |
| C38 | C | 1 | 0.98850 | 0.94787 | 0.23067 | 1 |
| C39 | C | 1 | 0.62533 | 0.62533 | 0.50000 | 1 |
| C40 | C | 1 | 0.37466 | 0.37466 | 0.00000 | 1 |
| C41 | C | 1 | 0.12540 | 0.87460 | 0.25000 | 1 |
| C42 | C | 1 | 0.87460 | 0.12540 | 0.75000 | 1 |
| C43 | C | 1 | 0.01150 | 0.05213 | 0.73067 | 1 |
| C44 | C | 1 | 0.83132 | 0.83132 | 0.00000 | 1 |
| C45 | C | 1 | 0.96240 | 0.91067 | 0.03053 | 1 |
| C46 | C | 1 | 0.59946 | 0.85104 | 0.73899 | 1 |
| C47 | C | 1 | 0.70773 | 0.92704 | 0.66181 | 1 |

```
C48 C 1 0.64292 0.88484 0.60465 1
N1 N 1 0.66346 0.07446 0.90393 1
N2 N 1 0.33654 0.92554 0.40393 1
N3 N 1 0.83659 0.57440 0.34614 1
N4 N 1 0.16341 0.42560 0.84614 1
N5 N 1 0.92554 0.33654 0.59607 1
N6 N 1 0.07445 0.66347 0.09608 1
N7 N 1 0.42561 0.16341 0.15386 1
N8 N 1 0.59452 0.18004 0.99726 1
N9 N 1 0.40548 0.81995 0.49726 1
N10 N 1 0.90557 0.67988 0.25273 1
N11 N 1 0.09443 0.32012 0.75273 1
N12 N 1 0.81996 0.40548 0.50274 1
N13 N 1 0.18004 0.59452 0.00275 1
N14 N 1 0.32013 0.09443 0.24727 1
N15 N 1 0.67221 0.41150 0.30096 1
N16 N 1 0.32779 0.58850 0.80097 1
N17 N 1 0.82774 0.91149 0.94905 1
N18 N 1 0.17226 0.08851 0.44906 1
N19 N 1 0.58851 0.32780 0.19903 1
N20 N 1 0.41149 0.67219 0.69904 1
N21 N 1 0.08852 0.17225 0.55095 1
N22 N 1 0.36114 0.46457 0.96776 1
N23 N 1 0.63886 0.53543 0.46776 1
N24 N 1 0.13890 0.96448 0.28232 1
N25 N 1 0.86110 0.03552 0.78231 1
N26 N 1 0.53543 0.63885 0.53224 1
N27 N 1 0.46457 0.36114 0.03224 1
N28 N 1 0.03552 0.86111 0.21769 1
N29 N 1 0.96448 0.13890 0.71769 1
N30 N 1 0.91148 0.82776 0.05095 1
N31 N 1 0.67988 0.90556 0.74727 1
N32 N 1 0.57439 0.83658 0.65387 1
Zn1 Zn 1 0.52861 0.24810 0.09955 1
Zn2 Zn 1 0.47139 0.75189 0.59957 1
Zn3 Zn 1 0.97140 0.74805 0.15042 1
Zn4 Zn 1 0.02860 0.25195 0.65042 1
Zn5 Zn 1 0.75190 0.47139 0.40045 1
Zn6 Zn 1 0.24810 0.52861 0.90046 1
Zn7 Zn 1 0.25197 0.02859 0.34958 1
Zn8 Zn 1 0.74804 0.97140 0.84957 1
#End of data
```

```
data_C6 H6 N4 Zn/P41
_audit_creation_date          2009-12-07
_audit_creation_method        'Igor Baburin'
_chemical_formula_moiety
;
C6 H6 N4 Zn/P41
;
_chemical_formula_sum          'C6 H6 N4 Zn1'
_citation_special_details
;
File: dia_P41
;
_cell_length_a                 9.8691
_cell_length_b                 9.8691
_cell_length_c                 13.2008
_cell_angle_alpha              90
_cell_angle_beta               90
_cell_angle_gamma              90
_cell_volume                   1285.746
_cell_formula_units_Z          4
_symmetry_space_group_name_H-M 'P 1'
_symmetry_Int_Tables_number    1
_refine_ls_R_factor_all        0
loop_
_symmetry_equiv_pos_site_id
_symmetry_equiv_pos_as_xyz
1 x,y,z
loop_
_atom_site_label
_atom_site_type_symbol
_atom_site_symmetry_multiplicity
_atom_site_fract_x
_atom_site_fract_y
_atom_site_fract_z
_atom_site_occupancy
H1 H 1 0.39446 0.95930 0.44170 1
H2 H 1 0.60558 0.04075 0.94170 1
H3 H 1 0.95944 0.60576 0.19175 1
H4 H 1 0.16432 0.89569 0.55557 1
H5 H 1 0.83572 0.10435 0.05557 1
H6 H 1 0.89545 0.83577 0.30563 1
H7 H 1 0.48994 0.64472 0.64754 1
H8 H 1 0.51010 0.35532 0.14755 1
H9 H 1 0.64476 0.51002 0.39755 1
H10 H 1 0.21257 0.91036 0.10137 1
H11 H 1 0.78748 0.08968 0.60138 1
H12 H 1 0.91033 0.78745 0.85134 1
H13 H 1 0.15606 0.67547 0.99025 1
H14 H 1 0.84399 0.32457 0.49025 1
H15 H 1 0.67541 0.84394 0.74025 1
H16 H 1 0.30952 0.97637 0.79284 1
H17 H 1 0.69052 0.02366 0.29285 1
H18 H 1 0.97631 0.69056 0.54282 1
H19 H 1 0.02373 0.30948 0.04282 1
H20 H 1 0.32463 0.15608 0.24025 1
H21 H 1 0.08970 0.21257 0.35134 1
H22 H 1 0.35528 0.49003 0.89754 1
H23 H 1 0.10459 0.16427 0.80563 1
H24 H 1 0.04060 0.39428 0.69175 1
C1 C 1 0.38004 0.88375 0.50100 1
C2 C 1 0.62000 0.11630 0.00101 1
C3 C 1 0.88381 0.62002 0.25102 1
C4 C 1 0.26601 0.85246 0.55778 1
C5 C 1 0.73405 0.14758 0.05778 1
C6 C 1 0.85236 0.73403 0.30779 1
```

```
C7 C 1 0.43217 0.72171 0.60675 1
C8 C 1 0.56787 0.27833 0.10675 1
C9 C 1 0.72175 0.56779 0.35674 1
C10 C 1 0.22464 0.88931 0.02073 1
C11 C 1 0.77540 0.11072 0.52074 1
C12 C 1 0.88930 0.77539 0.77071 1
C13 C 1 0.19626 0.77300 0.96552 1
C14 C 1 0.80378 0.22704 0.46552 1
C15 C 1 0.77296 0.80376 0.71553 1
C16 C 1 0.27568 0.92632 0.86219 1
C17 C 1 0.72436 0.07372 0.36220 1
C18 C 1 0.92630 0.72438 0.61217 1
C19 C 1 0.07374 0.27565 0.11217 1
C20 C 1 0.22708 0.19627 0.21552 1
C21 C 1 0.11073 0.22464 0.27071 1
C22 C 1 0.27829 0.43226 0.85674 1
C23 C 1 0.14768 0.26601 0.80779 1
C24 C 1 0.11623 0.38002 0.75102 1
N1 N 1 0.48520 0.80045 0.53233 1
N2 N 1 0.51484 0.19960 0.03233 1
N3 N 1 0.80057 0.51479 0.28235 1
N4 N 1 0.29969 0.74920 0.62476 1
N5 N 1 0.70036 0.25083 0.12476 1
N6 N 1 0.74914 0.70030 0.37475 1
N7 N 1 0.27500 0.98639 0.95468 1
N8 N 1 0.72504 0.01365 0.45469 1
N9 N 1 0.98637 0.72504 0.70465 1
N10 N 1 0.22899 0.79708 0.86488 1
N11 N 1 0.77105 0.20295 0.36488 1
N12 N 1 0.79706 0.77102 0.61488 1
N13 N 1 0.20298 0.22901 0.11487 1
N14 N 1 0.01366 0.27499 0.20466 1
N15 N 1 0.25091 0.29975 0.87475 1
N16 N 1 0.19947 0.48525 0.78235 1
Zn1 Zn 1 0.18269 0.68216 0.74102 1
Zn2 Zn 1 0.81736 0.31788 0.24103 1
Zn3 Zn 1 0.68213 0.81734 0.49109 1
Zn4 Zn 1 0.31791 0.18270 0.99109 1
#End of data
```

```
data_C6 H6 N4 Zn/P4322
_audit_creation_date          2009-12-07
_audit_creation_method        'Igor Baburin'
_chemical_formula_moiety
;
C6 H6 N4 Zn/P4322
;
_chemical_formula_sum          'C6 H6 N4 Zn1'
_citation_special_details
;
File: dia_P4322
;
_cell_length_a                 9.8724
_cell_length_b                 9.8724
_cell_length_c                 15.5143
_cell_angle_alpha              90
_cell_angle_beta               90
_cell_angle_gamma              90
_cell_volume                   1512.09
_cell_formula_units_Z          4
_symmetry_space_group_name_H-M 'P 1'
_symmetry_Int_Tables_number    1
_refine_ls_R_factor_all        0
loop_
_symmetry_equiv_pos_site_id
_symmetry_equiv_pos_as_xyz
1 x,y,z
loop_
_atom_site_label
_atom_site_type_symbol
_atom_site_symmetry_multiplicity
_atom_site_fract_x
_atom_site_fract_y
_atom_site_fract_z
_atom_site_occupancy
H1 H 1 0.00249 0.90176 0.06477 1
H2 H 1 0.99751 0.09824 0.56476 1
H3 H 1 0.00250 0.09823 0.93519 1
H4 H 1 0.59778 0.00000 0.00000 1
H5 H 1 0.99847 0.61395 0.05239 1
H6 H 1 0.00153 0.38605 0.55239 1
H7 H 1 0.99847 0.38603 0.94758 1
H8 H 1 0.59342 0.50000 0.00000 1
H9 H 1 0.40192 0.50291 0.68510 1
H10 H 1 0.59808 0.49709 0.18510 1
H11 H 1 0.40191 0.49711 0.31487 1
H12 H 1 0.50000 0.90187 0.25000 1
H13 H 1 0.88595 0.49854 0.80233 1
H14 H 1 0.11404 0.50147 0.30233 1
H15 H 1 0.88595 0.50146 0.19764 1
H16 H 1 0.00000 0.90656 0.25000 1
H17 H 1 0.00000 0.09344 0.75000 1
H18 H 1 0.11405 0.49854 0.69764 1
H19 H 1 0.50000 0.09813 0.75000 1
H20 H 1 0.59808 0.50289 0.81487 1
H21 H 1 0.40657 0.50000 0.50000 1
H22 H 1 0.00153 0.61397 0.44758 1
H23 H 1 0.40221 0.00000 0.50000 1
H24 H 1 0.99749 0.90177 0.43519 1
C1 C 1 0.91818 0.95160 0.03227 1
C2 C 1 0.08181 0.04840 0.53227 1
C3 C 1 0.91819 0.04840 0.96768 1
C4 C 1 0.70833 0.00000 0.00000 1
C5 C 1 0.91370 0.55720 0.02570 1
C6 C 1 0.08629 0.44281 0.52570 1
```

```
C7 C 1 0.91370 0.44278 0.97428 1
C8 C 1 0.70406 0.50000 0.00000 1
C9 C 1 0.45165 0.41859 0.71765 1
C10 C 1 0.54834 0.58141 0.21765 1
C11 C 1 0.45165 0.58142 0.28232 1
C12 C 1 0.50000 0.79131 0.25000 1
C13 C 1 0.94274 0.41376 0.77565 1
C14 C 1 0.05725 0.58624 0.27565 1
C15 C 1 0.94274 0.58623 0.22432 1
C16 C 1 0.00000 0.79590 0.25000 1
C17 C 1 0.00000 0.20410 0.75000 1
C18 C 1 0.05725 0.41377 0.72432 1
C19 C 1 0.50000 0.20869 0.75000 1
C20 C 1 0.54834 0.41858 0.78232 1
C21 C 1 0.29594 0.50000 0.50000 1
C22 C 1 0.08629 0.55722 0.47428 1
C23 C 1 0.29167 0.00000 0.50000 1
C24 C 1 0.08180 0.95161 0.46768 1
N1 N 1 0.78463 0.92117 0.05282 1
N2 N 1 0.21536 0.07883 0.55282 1
N3 N 1 0.78463 0.07882 0.94715 1
N4 N 1 0.78037 0.59289 0.04274 1
N5 N 1 0.21962 0.40712 0.54274 1
N6 N 1 0.78037 0.40710 0.95723 1
N7 N 1 0.42127 0.28501 0.69710 1
N8 N 1 0.57872 0.71499 0.19711 1
N9 N 1 0.42127 0.71500 0.30287 1
N10 N 1 0.90699 0.28040 0.79265 1
N11 N 1 0.09301 0.71960 0.29265 1
N12 N 1 0.90698 0.71959 0.20732 1
N13 N 1 0.09301 0.28041 0.70732 1
N14 N 1 0.57872 0.28501 0.80287 1
N15 N 1 0.21962 0.59290 0.45723 1
N16 N 1 0.21536 0.92118 0.44715 1
Zn1 Zn 1 0.74570 0.24584 0.87500 1
Zn2 Zn 1 0.25429 0.75416 0.37500 1
Zn3 Zn 1 0.74568 0.75413 0.12500 1
Zn4 Zn 1 0.25432 0.24587 0.62500 1
#End of data
```

```
data_C6 H6 N4 Zn/Pna21
_audit_creation_date          2009-12-07
_audit_creation_method        'Igor Baburin'
_chemical_formula_moiety
;
C6 H6 N4 Zn/Pna21
;
_chemical_formula_sum          'C6 H6 N4 Zn1'
_citation_special_details
;
File: dia_Pna21
;
_cell_length_a                 10.0637
_cell_length_b                 13.211
_cell_length_c                 10.3254
_cell_angle_alpha              90
_cell_angle_beta               90
_cell_angle_gamma              90
_cell_volume                   1372.778
_cell_formula_units_Z          4
_symmetry_space_group_name_H-M 'P 1'
_symmetry_Int_Tables_number    1
_refine_ls_R_factor_all        0
loop_
_symmetry_equiv_pos_site_id
_symmetry_equiv_pos_as_xyz
1 x,y,z
loop_
_atom_site_label
_atom_site_type_symbol
_atom_site_symmetry_multiplicity
_atom_site_fract_x
_atom_site_fract_y
_atom_site_fract_z
_atom_site_occupancy
H1 H 1 0.03672 0.83160 0.58862 1
H2 H 1 0.96324 0.16837 0.08868 1
H3 H 1 0.46324 0.33162 0.08866 1
H4 H 1 0.94550 0.57510 0.45942 1
H5 H 1 0.05441 0.42489 0.95940 1
H6 H 1 0.55444 0.07511 0.95941 1
H7 H 1 0.09724 0.36949 0.73650 1
H8 H 1 0.90283 0.63052 0.23653 1
H9 H 1 0.40280 0.86950 0.23649 1
H10 H 1 0.05830 0.26820 0.50297 1
H11 H 1 0.94176 0.73181 0.00300 1
H12 H 1 0.44172 0.76817 0.00298 1
H13 H 1 0.74006 0.68721 0.81275 1
H14 H 1 0.25993 0.31282 0.31271 1
H15 H 1 0.75992 0.18720 0.31272 1
H16 H 1 0.80758 0.95194 0.59166 1
H17 H 1 0.19238 0.04804 0.09170 1
H18 H 1 0.69238 0.45195 0.09169 1
H19 H 1 0.30759 0.54805 0.59170 1
H20 H 1 0.24005 0.81282 0.81272 1
H21 H 1 0.55826 0.23183 0.50297 1
H22 H 1 0.59720 0.13050 0.73648 1
H23 H 1 0.44553 0.92488 0.45941 1
H24 H 1 0.53673 0.66839 0.58865 1
C1 C 1 0.98126 0.50483 0.50275 1
C2 C 1 0.01869 0.49516 0.00273 1
C3 C 1 0.51871 0.00484 0.00274 1
C4 C 1 0.05945 0.39780 0.64440 1
C5 C 1 0.94059 0.60220 0.14441 1
C6 C 1 0.44058 0.89780 0.14439 1
```

```
C7 C 1 0.04013 0.34714 0.52825 1
C8 C 1 0.95990 0.65287 0.02826 1
C9 C 1 0.45988 0.84712 0.02823 1
C10 C 1 0.78960 0.74304 0.75154 1
C11 C 1 0.21039 0.25697 0.25153 1
C12 C 1 0.71039 0.24304 0.25153 1
C13 C 1 0.82751 0.87899 0.63715 1
C14 C 1 0.17246 0.12100 0.13718 1
C15 C 1 0.67246 0.37900 0.13717 1
C16 C 1 0.94085 0.81915 0.63523 1
C17 C 1 0.05912 0.18082 0.13527 1
C18 C 1 0.55913 0.31916 0.13525 1
C19 C 1 0.44086 0.68084 0.63525 1
C20 C 1 0.32752 0.62100 0.63717 1
C21 C 1 0.28959 0.75697 0.75153 1
C22 C 1 0.54011 0.15287 0.52824 1
C23 C 1 0.55941 0.10220 0.64438 1
C24 C 1 0.48128 0.99516 0.50273 1
N1 N 1 0.02161 0.49796 0.62781 1
N2 N 1 0.97838 0.50203 0.12781 1
N3 N 1 0.47838 0.99797 0.12780 1
N4 N 1 0.99061 0.41564 0.43837 1
N5 N 1 0.00936 0.58436 0.93837 1
N6 N 1 0.50936 0.91563 0.93835 1
N7 N 1 0.73190 0.83029 0.71124 1
N8 N 1 0.26807 0.16972 0.21123 1
N9 N 1 0.76808 0.33029 0.21125 1
N10 N 1 0.91621 0.73284 0.70806 1
N11 N 1 0.08377 0.26715 0.20807 1
N12 N 1 0.58377 0.23284 0.20806 1
N13 N 1 0.41620 0.76717 0.70806 1
N14 N 1 0.23190 0.66971 0.71124 1
N15 N 1 0.49062 0.08437 0.43836 1
N16 N 1 0.52161 0.00204 0.62780 1
Zn1 Zn 1 0.04486 0.61815 0.74914 1
Zn2 Zn 1 0.95513 0.38185 0.24913 1
Zn3 Zn 1 0.45506 0.11817 0.24918 1
Zn4 Zn 1 0.54488 0.88184 0.74915 1
#End of data
```



```
data_C6 H6 N4 Zn/Pnc2
_audit_creation_date          2009-12-07
_audit_creation_method        'Igor Baburin'
_chemical_formula_moiety
;
C6 H6 N4 Zn/Pnc2
;
_chemical_formula_sum          'C6 H6 N4 Zn1'
_citation_special_details
;
File: dia_Pnc2
;
_cell_length_a                 9.8932
_cell_length_b                 14.905
_cell_length_c                 10.0067
_cell_angle_alpha              90
_cell_angle_beta               90
_cell_angle_gamma              90
_cell_volume                   1475.569
_cell_formula_units_Z          4
_symmetry_space_group_name_H-M 'P 1'
_symmetry_Int_Tables_number    1
_refine_ls_R_factor_all        0
loop_
_symmetry_equiv_pos_site_id
_symmetry_equiv_pos_as_xyz
1 x,y,z
loop_
_atom_site_label
_atom_site_type_symbol
_atom_site_symmetry_multiplicity
_atom_site_fract_x
_atom_site_fract_y
_atom_site_fract_z
_atom_site_occupancy
H1 H 1 0.60833 0.05992 0.76960 1
H2 H 1 0.39164 0.94005 0.76959 1
H3 H 1 0.39168 0.55992 0.26960 1
H4 H 1 0.50000 0.00000 0.16862 1
H5 H 1 0.10239 0.93563 0.77059 1
H6 H 1 0.89758 0.06430 0.77060 1
H7 H 1 0.89761 0.43563 0.27059 1
H8 H 1 0.00000 0.00000 0.17013 1
H9 H 1 0.51328 0.25579 0.45123 1
H10 H 1 0.48673 0.74418 0.45124 1
H11 H 1 0.48673 0.75579 0.95123 1
H12 H 1 0.50769 0.14348 0.22894 1
H13 H 1 0.49230 0.85648 0.22895 1
H14 H 1 0.49231 0.64349 0.72894 1
H15 H 1 0.90196 0.24982 0.27525 1
H16 H 1 0.09805 0.75014 0.27526 1
H17 H 1 0.09805 0.74982 0.77525 1
H18 H 1 0.90196 0.25014 0.77525 1
H19 H 1 0.50771 0.35648 0.72895 1
H20 H 1 0.51328 0.24418 0.95124 1
H21 H 1 0.00000 0.50000 0.67013 1
H22 H 1 0.10242 0.56431 0.27060 1
H23 H 1 0.50000 0.50000 0.66862 1
H24 H 1 0.60836 0.44005 0.26959 1
C1 C 1 0.55430 0.02938 0.85298 1
C2 C 1 0.44566 0.97058 0.85298 1
C3 C 1 0.44570 0.52938 0.35298 1
C4 C 1 0.50000 0.00000 0.05951 1
C5 C 1 0.05044 0.96773 0.85400 1
C6 C 1 0.94955 0.03221 0.85400 1
```

```
C7 C 1 0.94957 0.46773 0.35400 1
C8 C 1 0.00000 0.00000 0.06105 1
C9 C 1 0.59393 0.23722 0.38234 1
C10 C 1 0.40609 0.76275 0.38234 1
C11 C 1 0.40608 0.73722 0.88234 1
C12 C 1 0.59144 0.18098 0.27226 1
C13 C 1 0.40855 0.81899 0.27226 1
C14 C 1 0.40857 0.68098 0.77226 1
C15 C 1 0.79518 0.23574 0.29305 1
C16 C 1 0.20483 0.76422 0.29306 1
C17 C 1 0.20483 0.73575 0.79305 1
C18 C 1 0.79518 0.26421 0.79306 1
C19 C 1 0.59146 0.31899 0.77226 1
C20 C 1 0.59392 0.26275 0.88234 1
C21 C 1 0.00000 0.50000 0.56105 1
C22 C 1 0.05046 0.53221 0.35400 1
C23 C 1 0.50000 0.50000 0.55951 1
C24 C 1 0.55434 0.47058 0.35298 1
N1 N 1 0.58870 0.04787 0.98454 1
N2 N 1 0.41129 0.95210 0.98454 1
N3 N 1 0.41131 0.54787 0.48454 1
N4 N 1 0.08200 0.94726 0.98575 1
N5 N 1 0.91798 0.05269 0.98575 1
N6 N 1 0.91801 0.44726 0.48575 1
N7 N 1 0.72333 0.27200 0.39514 1
N8 N 1 0.27669 0.72797 0.39514 1
N9 N 1 0.27668 0.77199 0.89514 1
N10 N 1 0.71979 0.17975 0.21585 1
N11 N 1 0.28020 0.82021 0.21585 1
N12 N 1 0.28021 0.67975 0.71585 1
N13 N 1 0.71980 0.32021 0.71585 1
N14 N 1 0.72332 0.22797 0.89514 1
N15 N 1 0.08203 0.55269 0.48575 1
N16 N 1 0.58872 0.45210 0.48454 1
Zn1 Zn 1 0.75283 0.12682 0.03239 1
Zn2 Zn 1 0.24718 0.87315 0.03237 1
Zn3 Zn 1 0.24717 0.62682 0.53238 1
Zn4 Zn 1 0.75284 0.37315 0.53237 1
#End of data
```
